# Supplementary material
Source: PubMed Central journal article supplement (PMC8212940)
Supplement: NIHMS1711402-supplement-Supporting_Information.pdf [file NIHMS1711402-supplement-Supporting_Information.pdf]

## Endogenous Enzymes Enable Antimicrobial Activity

Kenton J. Hetrick,<sup>†,‡</sup> Miguel A. Aguilar Ramos,<sup>†</sup> and Ronald T. Raines<sup>\*,†,‡</sup>

<sup>†</sup>Department of Chemistry, Massachusetts Institute of Technology, Cambridge, Massachusetts 02139, USA

<sup>‡</sup>Broad Institute of MIT and Harvard, Cambridge, Massachusetts 02142, United States

\*Corresponding author: rtraines@mit.edu

| Content                                                                                                 | Page |
|---------------------------------------------------------------------------------------------------------|------|
| Table of Contents                                                                                       | S1   |
| Materials                                                                                               | S2   |
| Instruments                                                                                             | S2   |
| Synthetic Methods                                                                                       | S2   |
| Biological Methods                                                                                      | S11  |
| <b>Table S1.</b> Annotated Carboxylesterases in the Sequence Similarity Network in Figure 3A            | S15  |
| <b>Figure S1.</b> Esterase activity of bacterial cell lysates                                           | S21  |
| <b>Figure S2.</b> Screen of antimicrobial esters against <i>E. coli</i>                                 | S22  |
| <b>Figure S3.</b> Screen of antimicrobial esters against <i>M. smegmatis</i>                            | S23  |
| <b>Figure S4.</b> Screen of alcohol compounds against <i>E. coli</i>                                    | S24  |
| <b>Figure S5.</b> Screen of alcohol compounds against <i>B. subtilis</i>                                | S25  |
| <b>Figure S6.</b> Screen of alcohol compounds against <i>M. smegmatis</i>                               | S26  |
| <b>Figure S7.</b> Calibration of sulfurol ester:sulfurol peak-area ratio versus % hydrolyzed            | S27  |
| <b>Figure S8.</b> LC–MS spectra and calibration curves of <i>trans</i> -3-(4-chlorobenzoyl)acrylic acid | S27  |
| <b>Figure S9.</b> Determination of the E-value threshold for SSN                                        | S29  |
| <b>Figure S10.</b> Viability curves of <i>E. coli</i> DH10B cells                                       | S30  |
| <b>Figure S11.</b> Extracted ion chromatograms of sulfurol ester <b>3</b>                               | S30  |
| NMR Spectra                                                                                             | S31  |
| References                                                                                              | S53  |

## Materials and Methods

**Materials.** Chemicals were purchased from Sigma–Aldrich (Milwaukee, WI), Acros Organics (New Jersey, NJ) or Combi-Blocks (San Diego, CA) and used without further purification. All glassware was flame- or oven-dried, and all reactions were performed under a N<sub>2</sub>(g) atmosphere unless indicated otherwise. Dichloromethane (DCM), tetrahydrofuran (THF), diethyl ether (Et<sub>2</sub>O), and triethylamine (TEA) were dried over a column of activated alumina and accessed under a blanket of Ar(g). Dimethylformamide (DMF) was dried over a column of activated alumina, purified further through an isocyanate scrubbing column, and accessed under a blanket of Ar(g). Dry acetone was obtained by shaking with activated Drierite (Ca<sub>2</sub>SO<sub>4</sub>(s)) and subsequent distillation from fresh Drierite under an atmosphere of N<sub>2</sub>(g). Column chromatography was performed using 40–63 Å silica gel, 230–400 mesh from Silicycle (Québec City, Canada). Thin-layer chromatography (TLC) was performed with EMD 250-µm silica gel 60-F<sub>254</sub> plates and visualized by using UV light or staining with KMnO<sub>4</sub>, bromocresol green, or ceric ammonium nitrate.

**Conditions.** All reactions were performed in air at ambient temperature (~22 °C) and pressure (1.0 atm) unless indicated otherwise.

**Solvent Removal.** The phrase “under reduced pressure” refers to removal of solvent and other volatile materials with a rotary evaporator at water-aspirator pressure (<20 torr) and a water bath at <40 °C. Residual solvent was removed from samples at high vacuum (<0.1 torr). The phrase “high vacuum” refers to the vacuum achieved by using a mechanical belt-drive oil pump.

**NMR Spectroscopy.** <sup>1</sup>H and <sup>13</sup>C NMR spectra were obtained at ambient temperature with an Avance Neo (500 MHz) or Avance-III HD Nanobay spectrometer (400 MHz) from Bruker (Billerica, MA) at the Department of Chemistry Instrumentation Facility (DCIF) and were referenced to TMS or residual protic solvent.

**Mass Spectrometry.** High-resolution mass spectrometry data were obtained with an AccuTOF 4G LC-plus from JEOL (Tokyo, Japan) equipped with an ionSense (Saugus, MA) DART (Direct Analysis in Real Time) at the Department of Chemistry Instrumentation Facility (DCIF). LC–MS data were acquired with a 6125B mass spectrometer from Agilent Technologies (Santa Clara, CA) attached to an Agilent 1260 Infinity LC with an electrospray ionization source in the positive mode.

**UV–Vis Spectroscopy.** Absorbance measurements were made with an infinite M1000 plate reader from Tecan (Männedorf, Switzerland).

## Synthetic Methods

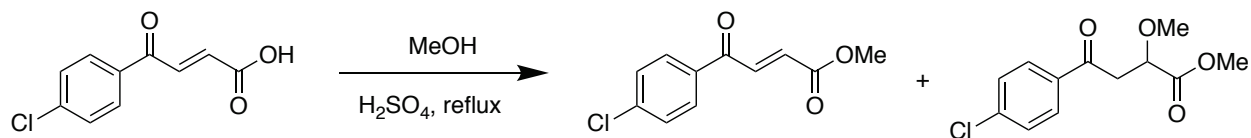

**Methyl (*E*)-4-(4-chlorophenyl)-4-oxobut-2-enoate (2).** (*E*)-4-(4-Chlorophenyl)-4-oxobut-2-enoic acid (210 mg, 1.0 mmol) was dissolved in methanol (10 mL). Concentrated sulfuric acid (0.1 mL) was added, and the solution was heated at reflux under air for 6 h. The reaction mixture was concentrated under reduced pressure and taken up into ethyl acetate. The organic phase was extracted with saturated aqueous NaHCO<sub>3</sub> (2×), H<sub>2</sub>O (2×), and brine (1×), dried with MgSO<sub>4</sub>(s), and filtered before the solvent was removed under reduced pressure. The products were separated

by column chromatography to afford methyl (*E*)-4-(4-chlorophenyl)-4-oxobut-2-enoate (25% yield,  $R_f = 0.25$  in 10% v/v EtOAc in hexanes) as a light yellow solid and methyl 4-(4-chlorophenyl)-2-methoxy-4-oxobutanoate (73% yield,  $R_f = 0.17$  in 10% v/v EtOAc in hexanes) as a white solid. *Methyl (E)-4-(4-chlorophenyl)-4-oxobut-2-enoate (2)*:  $^1\text{H NMR}$  (400 MHz,  $\text{CDCl}_3$ ,  $\delta$ ): 7.97–7.93 (m, 2H), 7.88 (d,  $J = 15.6$  Hz, 1H), 7.52–7.47 (m, 2H), 6.90 (d,  $J = 15.6$  Hz, 1H), 3.86 (s, 3H).  $^{13}\text{C NMR}$  (101 MHz,  $\text{CDCl}_3$ ,  $\delta$ ): 195.95, 179.92, 139.31, 136.15, 135.04, 132.67, 130.38, 129.43, 52.58. **HRMS–DART** ( $m/z$ ):  $[\text{M} + \text{H}]^+$  calcd for  $\text{C}_{11}\text{H}_{10}\text{ClO}_3^+$ , 225.0313; found, 225.0316. *Methyl 4-(4-chlorophenyl)-2-methoxy-4-oxobutanoate (SI)*:  $^1\text{H NMR}$  (400 MHz,  $\text{CDCl}_3$ ,  $\delta$ ): 7.90–7.85 (m, 2H), 7.46–7.40 (m, 2H), 4.41 (dd,  $J = 7.9, 4.3$  Hz, 1H), 3.78 (s, 3H), 3.46 (s, 3H), 3.45–3.39 (m, 1H), 3.28 (dd,  $J = 17.0, 4.3$  Hz, 1H).  $^{13}\text{C NMR}$  (101 MHz,  $\text{CDCl}_3$ ,  $\delta$ ): 195.20, 172.56, 140.04, 135.02, 129.73, 129.10, 76.38, 59.08, 52.36, 41.54. **HRMS–DART** ( $m/z$ ):  $[\text{M} + \text{H}]^+$  calcd for  $\text{C}_{12}\text{H}_{13}\text{ClO}_4^+$ , 257.0575; found, 257.0574.

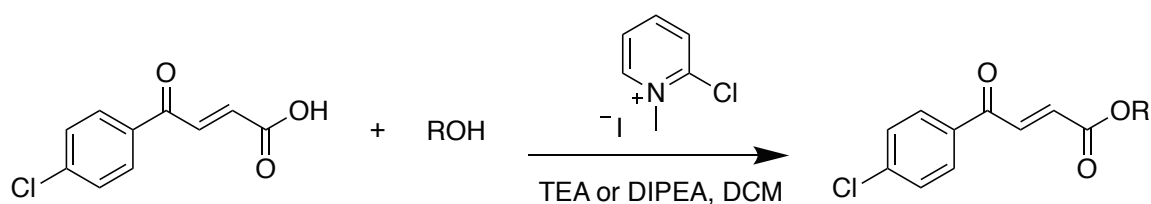

**General Procedure A for the Synthesis of Esters Derived from (*E*)-4-(4-Chlorophenyl)-4-oxobut-2-enoic acid.** (*E*)-4-(4-Chlorophenyl)-4-oxobut-2-enoic acid (210 mg, 1.0 mmol), an alcohol (1.0 mmol), and Mukaiyama's reagent (307 mg, 1.2 mmol) were dissolved in DCM (10 mL). TEA (0.28 mL, 2.0 mmol) was added in one portion, and the resulting solution was stirred until the reaction was complete according to TLC (4–8 h). Solvent was removed under reduced pressure, and the residue was dissolved by sonication in ethyl acetate. The organic phase was extracted with 3 M HCl (1 $\times$ ), saturated aqueous  $\text{NaHCO}_3$  (2 $\times$ ),  $\text{H}_2\text{O}$  (1 $\times$ ), and brine (1 $\times$ ), dried with  $\text{MgSO}_4(\text{s})$ , and filtered before solvent was removed under reduced pressure. Column chromatography was performed with a gradient of hexanes/EtOAc to afford pure compounds.

**General Procedure B for the Synthesis of Esters Derived from (*E*)-4-(4-Chlorophenyl)-4-oxobut-2-enoic acid.** (*E*)-4-(4-Chlorophenyl)-4-oxobut-2-enoic acid (210 mg, 1.0 mmol), an alcohol (1.0 mmol), and Mukaiyama's reagent (307 mg, 1.2 mmol) were dissolved in DCM (10 mL). DIPEA (0.52 mL, 3.0 mmol) was added in one portion, and the resulting solution was stirred overnight. Solvent was removed under reduced pressure, and the residue was dissolved by sonication in DCM. The organic phase was extracted with saturated aqueous  $\text{NaHCO}_3$  (2 $\times$ ),  $\text{H}_2\text{O}$  (1 $\times$ ), and brine (1 $\times$ ), dried with  $\text{MgSO}_4(\text{s})$ , and filtered before solvent was removed under reduced pressure. Column chromatography was performed with a gradient of DCM/MeOH to afford pure compounds.

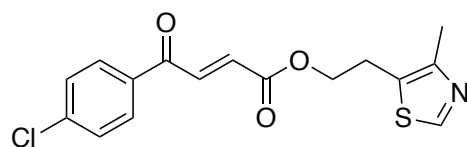

**2-(4-Methylthiazol-5-yl)ethyl (*E*)-4-(4-Chlorophenyl)-4-oxobut-2-enoate (3).** Following general procedure A, the title product was obtained as a brown solid (90% yield,  $R_f = 0.36$  in 50%

v/v EtOAc in hexanes).  $^1\text{H NMR}$  (400 MHz,  $\text{CDCl}_3$ ,  $\delta$ ): 8.61 (s, 1H), 7.97–7.91 (m, 2H), 7.87 (d,  $J = 15.5$  Hz, 1H), 7.54–7.47 (m, 2H), 6.89 (d,  $J = 15.5$  Hz, 1H), 4.41 (t,  $J = 6.6$  Hz, 2H), 3.20 (t,  $J = 6.6$  Hz, 2H), 2.44 (s, 3H).  $^{13}\text{C NMR}$  (101 MHz,  $\text{CDCl}_3$ ,  $\delta$ ): 188.14, 165.27, 150.30, 150.14, 140.76, 136.50, 134.98, 132.44, 130.37, 129.47, 126.40, 65.07, 25.88, 15.12. **HRMS–DART** ( $m/z$ ):  $[\text{M} + \text{H}]^+$  calcd for  $\text{C}_{16}\text{H}_{15}\text{ClNO}_3\text{S}^+$ , 336.0456; found, 336.0458.

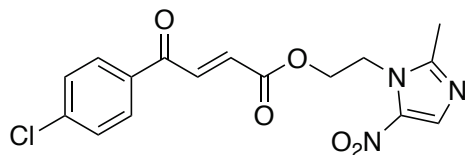

**2-(2-Methyl-5-nitro-1H-imidazol-1-yl)ethyl (E)-4-(4-Chlorophenyl)-4-oxobut-2-enoate (4).**

Following general procedure B, the title product was obtained as a brown solid (86% yield,  $R_f = 0.29$  in 5% v/v MeOH in DCM).  $^1\text{H NMR}$  (400 MHz,  $\text{CDCl}_3$ ,  $\delta$ ): 7.98 (s, 1H), 7.96–7.91 (m, 2H), 7.84 (d,  $J = 15.5$  Hz, 1H), 7.53–7.47 (m, 2H), 6.82 (d,  $J = 15.5$  Hz, 1H), 4.68 (t,  $J = 5.2$  Hz, 2H), 4.59 (t,  $J = 5.3$  Hz, 2H), 2.53 (s, 3H).  $^{13}\text{C NMR}$  (101 MHz,  $\text{CDCl}_3$ ,  $\delta$ ): 187.68, 164.89, 157.22, 150.88, 140.95, 137.24, 134.78, 133.46, 131.26, 130.39, 129.52, 63.56, 45.06, 14.58. **HRMS–DART** ( $m/z$ ):  $[\text{M} + \text{H}]^+$  calcd for  $\text{C}_{16}\text{H}_{15}\text{ClN}_3\text{O}_5^+$ , 364.0695; found, 364.0693.

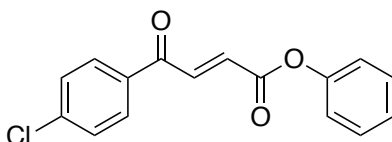

**Phenyl (E)-4-(4-Chlorophenyl)-4-oxobut-2-enoate (5).** Following general procedure A, the title product was obtained as a light pink solid (88% yield,  $R_f = 0.34$  in 10% v/v EtOAc in hexanes).  $^1\text{H NMR}$  (500 MHz,  $\text{CDCl}_3$ ,  $\delta$ ): 8.04 (d,  $J = 15.5$  Hz, 1H), 8.01–7.97 (m, 2H), 7.54–7.49 (m, 2H), 7.46–7.40 (m, 2H), 7.33–7.26 (m, 1H), 7.20–7.15 (m, 2H), 7.10 (d,  $J = 15.5$  Hz, 1H).  $^{13}\text{C NMR}$  (126 MHz,  $\text{CDCl}_3$ ,  $\delta$ ): 188.06, 164.01, 150.49, 140.84, 137.46, 134.93, 132.31, 130.44, 129.74, 129.50, 126.45, 121.45. **HRMS–DART** ( $m/z$ ):  $[\text{M} + \text{H}]^+$  calcd for  $\text{C}_{16}\text{H}_{12}\text{ClO}_3^+$ , 287.0472; found, 287.0469.

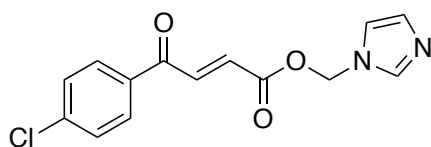

**(1H-Imidazol-1-yl)methyl (E)-4-(4-Chlorophenyl)-4-oxobut-2-enoate (6).** Following general procedure B, the title product was obtained as a light orange solid (36% yield,  $R_f = 0.54$  in 10% v/v MeOH in DCM).  $^1\text{H NMR}$  (400 MHz,  $\text{CDCl}_3$ ,  $\delta$ ): 8.61 (s, 2H), 7.30 (d,  $J = 1.2$  Hz, 2H), 7.08 (s, 1H), 7.11–7.00 (m, 1H), 6.93 (d,  $J = 1.4$  Hz, 2H), 5.40 (s, 4H).  $^{13}\text{C NMR}$  (101 MHz,  $\text{CDCl}_3$ ,  $\delta$ ): 188.19, 165.37, 141.20, 137.30, 132.05, 130.69, 129.82, 128.29, 119.62, 64.39, 44.56, 20.55, 12.57. **HRMS–DART** ( $m/z$ ):  $[\text{M} + \text{H}]^+$  calcd for  $\text{C}_{14}\text{H}_{12}\text{ClN}_2\text{O}_3^+$ , 291.0533; found, 291.0531.

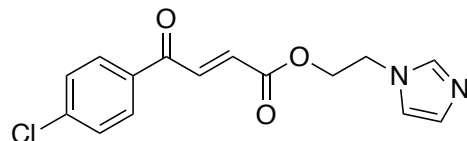

**2-(1*H*-imidazol-1-yl)ethyl (E)-4-(4-Chlorophenyl)-4-oxobut-2-enoate (7).** Following general procedure B, the title product was obtained as a light brown solid (75% yield,  $R_f = 0.45$  in 10% v/v MeOH in DCM).  $^1\text{H NMR}$  (400 MHz,  $\text{CDCl}_3$ ,  $\delta$ ): 7.95–7.90 (m, 2H), 7.85 (d,  $J = 15.5$  Hz, 1H), 7.53 (s, 1H), 7.52–7.47 (m, 2H), 7.10 (s, 1H), 6.98 (s, 1H), 6.88 (d,  $J = 15.5$  Hz, 1H), 4.51 (t,  $J = 5.3$  Hz, 2H), 4.29 (t,  $J = 5.3$  Hz, 2H).  $^{13}\text{C NMR}$  (101 MHz,  $\text{CDCl}_3$ ,  $\delta$ ): 187.89, 164.98, 140.86, 137.51, 137.05, 134.85, 131.71, 130.38, 130.23, 129.50, 119.19, 64.24, 45.74. **HRMS–DART** ( $m/z$ ):  $[\text{M} + \text{H}]^+$  calcd for  $\text{C}_{15}\text{H}_{14}\text{ClN}_2\text{O}_3^+$ , 305.0687; found, 305.0689.

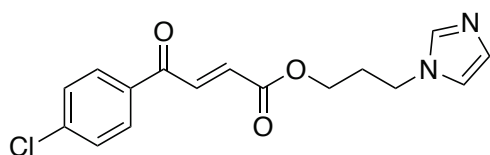

**3-(1*H*-imidazol-1-yl)propyl (E)-4-(4-Chlorophenyl)-4-oxobut-2-enoate (8).** Following general procedure B, the title product was obtained as an orange semisolid (50% yield,  $R_f = 0.42$  in 10% v/v MeOH in DCM).  $^1\text{H NMR}$  (400 MHz,  $\text{CDCl}_3$ ,  $\delta$ ): 7.98–7.93 (m, 2H), 7.87 (d,  $J = 15.5$  Hz, 1H), 7.53–7.48 (m, 3H), 7.09 (s, 1H), 6.94 (s, 1H), 6.90 (d,  $J = 15.5$  Hz, 1H), 4.25 (t,  $J = 6.0$  Hz, 2H), 4.10 (t,  $J = 6.9$  Hz, 2H), 2.21 (p,  $J = 6.5$  Hz, 2H).  $^{13}\text{C NMR}$  (101 MHz,  $\text{CDCl}_3$ ,  $\delta$ ): 188.13, 165.33, 140.82, 137.32, 136.69, 134.93, 132.25, 130.41, 130.09, 129.48, 118.89, 62.07, 43.77, 30.31. **HRMS–DART** ( $m/z$ ):  $[\text{M} + \text{H}]^+$  calcd for  $\text{C}_{16}\text{H}_{16}\text{ClN}_2\text{O}_3^+$ , 319.0844; found, 319.0844.

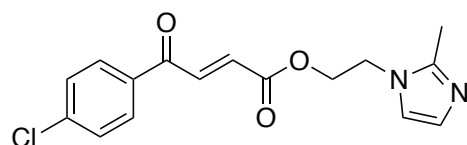

**2-(2-Methyl-1*H*-imidazol-1-yl)ethyl (E)-4-(4-Chlorophenyl)-4-oxobut-2-enoate (9).** Following general procedure B, the title product was obtained as an orange solid (51% yield,  $R_f = 0.44$  in 10% v/v MeOH in DCM).  $^1\text{H NMR}$  (400 MHz,  $\text{CDCl}_3$ ,  $\delta$ ): 7.95–7.91 (m, 2H), 7.85 (d,  $J = 15.5$  Hz, 1H), 7.53–7.47 (m, 2H), 6.95–6.84 (m, 3H), 4.48 (t,  $J = 5.6$  Hz, 2H), 4.19 (t,  $J = 5.6$  Hz, 2H), 2.43 (s, 3H).  $^{13}\text{C NMR}$  (101 MHz,  $\text{CDCl}_3$ ,  $\delta$ ): 186.00, 165.04, 162.72, 137.01, 134.86, 131.72, 130.37, 129.51, 127.94, 127.70, 119.45, 64.00, 44.68, 13.24. **HRMS–DART** ( $m/z$ ):  $[\text{M} + \text{H}]^+$  calcd for  $\text{C}_{16}\text{H}_{15}\text{ClN}_2\text{O}_3^+$ , 319.0844; found, 319.0845.

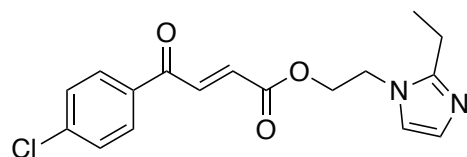

**2-(2-Ethyl-1*H*-imidazol-1-yl)ethyl (E)-4-(4-Chlorophenyl)-4-oxobut-2-enoate (10).** Following general procedure B, the title product was obtained as an orange solid (84% yield,  $R_f =$

0.47 in 10% v/v MeOH in DCM). **<sup>1</sup>H NMR** (400 MHz, CDCl<sub>3</sub>, δ): 7.95–7.90 (m, 2H), 7.85 (d, *J* = 15.5 Hz, 1H), 7.53–7.47 (m, 2H), 6.98 (d, *J* = 1.4 Hz, 1H), 6.89–6.84 (m, 2H), 4.48 (t, *J* = 5.6 Hz, 2H), 4.20 (t, *J* = 5.6 Hz, 2H), 2.72 (q, *J* = 7.5 Hz, 2H), 1.37 (t, *J* = 7.5 Hz, 3H). **<sup>13</sup>C NMR** (101 MHz, CDCl<sub>3</sub>, δ): 188.19, 165.37, 149.84, 141.20, 137.30, 135.17, 132.06, 130.69, 129.82, 128.29, 119.63, 77.48, 64.39, 44.56, 20.56, 12.57. **HRMS–DART** (*m/z*): [M + H]<sup>+</sup> calcd for C<sub>17</sub>H<sub>18</sub>ClN<sub>2</sub>O<sub>3</sub>, 333.1001; found, 333.1002.

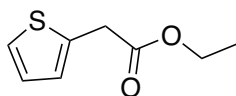

**Ethyl 2-(Thiophen-2-yl)acetate.** Ethyl 2-(thiophen-2-yl)acetate was prepared as described previously.<sup>1</sup>

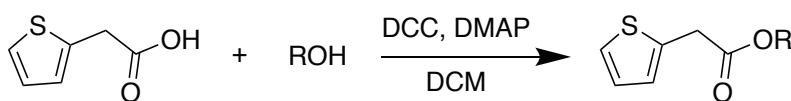

**General procedure for the Synthesis of Esters Derived from Thiophen-2-yl-acetic acid.**

Thiophen-2-yl-acetic acid (142 mg, 1.0 mmol), 4-dimethylaminopyridine (3.0 mg, 0.025 mmol) and alcohol (2.0 mmol) were cooled to 0 °C. A solution of dicyclohexylcarbodiimide (227 mg, 1.1 mmol) in DCM (1.1 mL) was added, and the resulting solution was stirred on ice for 15 min and then at room temperature for 3 h. The reaction mixture was filtered, and the filtrate was concentrated under reduced pressure. The crude mixture was taken up in EtOAc and washed twice with 1 M HCl (2×) (except for reactions involving imidazolyl alcohols), twice with saturated aqueous NaHCO<sub>3</sub> (1×), and brine (1×). The organic layer was dried over MgSO<sub>4</sub>(s), concentrated under reduced pressure, and purified by chromatography on silica gel, eluting with a gradient of hexanes/EtOAc or DCM/MeOH to afford pure compounds.

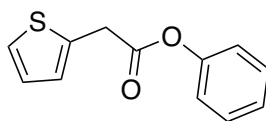

**Phenyl 2-(Thiophen-2-yl)acetate (S2).** Following the general procedure, the title compound was obtained as a white solid (95% yield, *R<sub>f</sub>* = 0.17 in 10% v/v EtOAc in hexanes). **<sup>1</sup>H NMR** (500 MHz, CDCl<sub>3</sub>, δ): 7.44–7.39 (m, 2H), 7.32–7.27 (m, 2H), 7.17–7.13 (m, 2H), 7.11–7.08 (m, 1H), 7.06–7.03 (m, 1H), 4.12 (s, 2H). **<sup>13</sup>C NMR** (126 MHz, CDCl<sub>3</sub>, δ): 168.92, 150.68, 134.40, 129.46, 127.17, 126.98, 126.02, 125.35, 121.42, 35.61. **HRMS–DART** (*m/z*): [M + H]<sup>+</sup> calcd for C<sub>12</sub>H<sub>11</sub>O<sub>2</sub>S<sup>+</sup>, 219.0474; found, 219.0470.

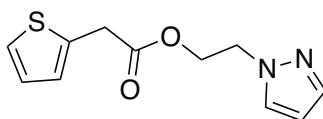

**2-(1H-Pyrazol-1-yl)ethyl 2-(Thiophen-2-yl)acetate (S3).** Following the general procedure, the title compound was obtained as a pale yellow oil (76% yield, *R<sub>f</sub>* = 0.20 in 30% v/v EtOAc in

hexanes). **<sup>1</sup>H NMR** (400 MHz, CDCl<sub>3</sub>, δ): 7.51 (d, *J* = 1.8 Hz, 1H), 7.20 (d, *J* = 5.2 Hz, 1H), 6.94 (dd, *J* = 5.2, 3.6 Hz, 1H), 6.89 (d, *J* = 3.5 Hz, 1H), 6.21 (t, *J* = 2.1 Hz, 1H), 4.47 (t, *J* = 5.3 Hz, 2H), 4.35 (t, *J* = 5.3 Hz, 2H), 3.81 (s, 2H). **<sup>13</sup>C NMR** (101 MHz, CDCl<sub>3</sub>, δ): 170.01, 139.90, 134.56, 129.84, 127.08, 126.94, 125.18, 105.80, 63.61, 50.67, 35.26. **HRMS–DART** (*m/z*): [M + H]<sup>+</sup> calcd for C<sub>11</sub>H<sub>13</sub>N<sub>2</sub>O<sub>2</sub>S<sup>+</sup>, 237.0692; found, 237.0691.

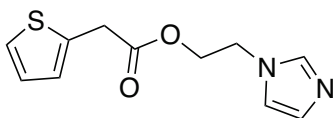

**2-(1*H*-imidazol-1-yl)ethyl 2-(thiophen-2-yl)acetate (S4)**. Following the general procedure, the title compound was obtained as a brown oil (61% yield, *R<sub>f</sub>* = 0.45 in 10% v/v MeOH in DCM). **<sup>1</sup>H NMR** (400 MHz, CDCl<sub>3</sub>, δ): 7.39 (s, 1H), 7.22 (dd, *J* = 5.2, 1.2 Hz, 1H), 7.03 (s, 1H), 6.96 (dd, *J* = 5.2, 3.5 Hz, 1H), 6.92–6.89 (m, 1H), 6.84 (s, 1H), 4.35 (dd, *J* = 5.8, 4.7 Hz, 2H), 4.17 (dd, *J* = 5.8, 4.7 Hz, 2H), 3.83 (s, 2H). **<sup>13</sup>C NMR** (101 MHz, CDCl<sub>3</sub>, δ): 170.00, 137.44, 134.28, 129.87, 127.25, 127.08, 125.40, 119.10, 64.00, 45.69, 35.30. **HRMS–DART** (*m/z*): [M + H]<sup>+</sup> calcd for C<sub>11</sub>H<sub>13</sub>N<sub>2</sub>O<sub>2</sub>S<sup>+</sup>, 237.0692; found, 237.0690.

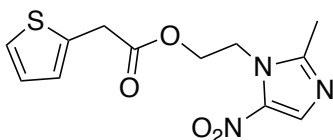

**2-(2-methyl-5-nitro-1*H*-imidazol-1-yl)ethyl 2-(thiophen-2-yl)acetate (S5)**. Following the general procedure, the title compound was obtained as a light brown solid (68% yield, *R<sub>f</sub>* = 0.17 in 50% v/v EtOAc in hexanes). **<sup>1</sup>H NMR** (500 MHz, CDCl<sub>3</sub>, δ): 7.95 (s, 1H), 7.22 (d, *J* = 5.2 Hz, 1H), 6.95 (dd, *J* = 5.1, 3.6 Hz, 1H), 6.87 (d, *J* = 3.6 Hz, 1H), 4.57 (t, *J* = 5.1 Hz, 2H), 4.47 (t, *J* = 5.1 Hz, 2H), 3.80 (s, 2H), 2.35 (s, 3H). **<sup>13</sup>C NMR** (126 MHz, CDCl<sub>3</sub>, δ): 169.98, 151.08, 138.59, 134.05, 133.38, 127.35, 127.18, 125.56, 63.43, 45.08, 35.30, 14.26. **HRMS–DART** (*m/z*): [M + H]<sup>+</sup> calcd for C<sub>12</sub>H<sub>14</sub>N<sub>3</sub>O<sub>4</sub>S<sup>+</sup>; found, 296.0700 296.0669.

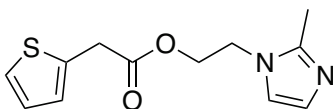

**2-(2-methyl-1*H*-imidazol-1-yl)ethyl 2-(thiophen-2-yl)acetate (S6)**. Following the general procedure, the title compound was obtained as a brown oil (70% yield, *R<sub>f</sub>* = 0.31 in 10% v/v MeOH in DCM). **<sup>1</sup>H NMR** (400 MHz, CDCl<sub>3</sub>, δ): 7.22 (dd, *J* = 5.2, 1.2 Hz, 1H), 6.95 (dd, *J* = 5.1, 3.5 Hz, 1H), 6.91–6.87 (m, 2H), 6.75 (d, *J* = 1.4 Hz, 1H), 4.33 (t, *J* = 5.5 Hz, 2H), 4.09 (t, *J* = 5.5 Hz, 2H), 3.82 (s, 2H), 2.34 (s, 3H). **<sup>13</sup>C NMR** (101 MHz, CDCl<sub>3</sub>, δ): 170.11, 144.81, 134.28, 127.72, 127.25, 127.08, 125.40, 119.31, 63.82, 44.60, 35.29, 13.09. **HRMS–DART** (*m/z*): [M + H]<sup>+</sup> calcd for C<sub>12</sub>H<sub>15</sub>N<sub>2</sub>O<sub>2</sub>S<sup>+</sup>, 251.0849; found, 251.0847.

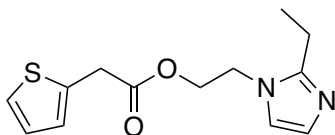

**2-(2-Ethyl-1H-imidazol-1-yl)ethyl 2-(Thiophen-2-yl)acetate (S7).** Following the general procedure, the title compound was obtained as a brown oil (86% yield,  $R_f = 0.39$  in 10% v/v MeOH in DCM).  $^1\text{H NMR}$  (400 MHz,  $\text{CDCl}_3$ ,  $\delta$ ): 7.22 (dd,  $J = 5.2, 1.3$  Hz, 1H), 6.96 (dd,  $J = 5.2, 3.5$  Hz, 1H), 6.93 (d,  $J = 1.4$  Hz, 1H), 6.90 (dd,  $J = 3.5, 1.3$  Hz, 1H), 6.76 (d,  $J = 1.4$  Hz, 1H), 4.34 (t,  $J = 5.6$  Hz, 2H), 4.10 (t,  $J = 5.6$  Hz, 2H), 3.83 (s, 2H), 2.65 (q,  $J = 7.5$  Hz, 2H), 1.33 (t,  $J = 7.5$  Hz, 3H).  $^{13}\text{C NMR}$  (101 MHz,  $\text{CDCl}_3$ ,  $\delta$ ): 170.16, 149.45, 134.31, 127.76, 127.26, 127.09, 125.42, 119.23, 63.91, 44.19, 35.32, 20.12, 12.19. **HRMS-DART** ( $m/z$ ):  $[\text{M} + \text{H}]^+$  calcd for  $\text{C}_{13}\text{H}_{17}\text{N}_2\text{O}_2\text{S}^+$ , 265.1005; found, 265.1005.

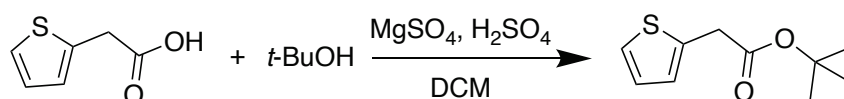

**Synthesis of *tert*-Butyl 2-(Thiophen-2-yl)acetate (S8).** Sulfuric acid (0.11 mL, 2.0 mmol) was added to dry magnesium sulfate (0.96g, 2.0 mmol) in dichloromethane (5 mL), and the resulting solution was stirred for 15 min. After this time, thiophen-2-yl-acetic acid (284 mg, 2.0 mmol) and *tert*-butanol (0.96mL, 10.0 mmol) were added sequentially, and the resulting solution was stirred for 18 h at room temperature. The reaction was quenched with a sodium bicarbonate solution, and extracted with ethyl acetate. The organic phase was dried with  $\text{MgSO}_4(\text{s})$  and the solvent was removed under reduced pressure. The residue was separated via column chromatography to obtain the desired product as a brown solid. (22% yield,  $R_f = 0.39$  in 20% v/v EtOAc in hexanes).  $^1\text{H NMR}$  (500 MHz,  $\text{CDCl}_3$ ,  $\delta$ ): 7.20 (dd,  $J = 5.1, 1.3$  Hz, 1H), 6.95 (dd,  $J = 5.2, 3.4$  Hz, 1H), 6.92 (dq,  $J = 3.4, 1.0$  Hz, 1H), 3.74 (d,  $J = 1.0$  Hz, 2H), 1.47 (s, 10H).  $^{13}\text{C NMR}$  (126 MHz,  $\text{CDCl}_3$ ,  $\delta$ ): 169.56, 135.76, 126.51, 126.33, 124.68, 81.25, 36.73, 27.88. **HRMS-DART** ( $m/z$ ):  $[\text{M} + \text{H}]^+$  calcd for  $\text{C}_{10}\text{H}_{15}\text{O}_2\text{S}^+$ , 199.0787; found, 199.0785.

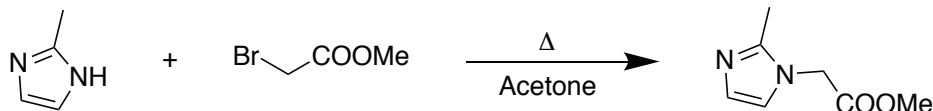

**Synthesis of Methyl 2-(2-Methyl-1H-imidazol-1-yl)acetate (S9).** 2-Methylimidazole (4.11 g, 0.05 mol) were dissolved in warm dry acetone (250 mL), and methylbromoacetate (5.7 mL, 0.06 mol) was added to the resulting solution in a single portion. The mixture was heated at reflux for 3 h, when the mixture turned into a milky white suspension. Solvent was removed under reduced pressure, and the residue was redissolved in methanol (50 mL) and heated at reflux for 1 h to quench unreacted methylbromoacetate. Solvent was removed under reduced pressure and co-evaporated twice with acetone to remove the last traces of methanol. The gooey solid was triturated with  $\text{Et}_2\text{O}$  ( $3 \times 20$  mL) with mechanical stirring, and dissolved in  $\text{Et}_2\text{O}$  (100 mL) with ammonia in MeOH (7 M, 20 mL) with stirring for 1 h. Solvent was removed under reduced pressure and co-evaporated with DCM under high vacuum. The product was isolated by column chromatography under an isocratic system (2% v/v MeOH in DCM) to give the title compound as a light orange oil (29% yield,  $R_f = 0.28$  in 10% v/v MeOH in DCM).  $^1\text{H NMR}$  (500 MHz,  $\text{CDCl}_3$ ,  $\delta$ ): 6.92 (s, 1H),



6.82 (s, 1H), 4.59 (s, 2H), 3.77 (s, 3H), 2.33 (s, 3H).  $^{13}\text{C}$  NMR (126 MHz,  $\text{CDCl}_3$ ,  $\delta$ ): 168.04, 145.37, 127.75, 120.25, 52.89, 47.42, 12.94. **HRMS–DART** ( $m/z$ ):  $[\text{M} + \text{H}]^+$  for  $\text{C}_7\text{H}_{11}\text{N}_2\text{O}_2^+$ , 155.0815; found, 155.0819.

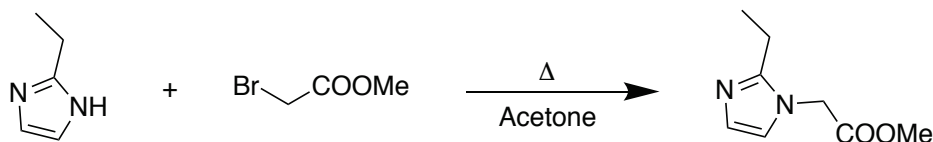

**Synthesis of Methyl 2-(2-Ethyl-1H-imidazol-1-yl)acetate (S10).** 2-Ethylimidazole (4.81 g, 0.05 mol) were dissolved in warm dry acetone (250 mL). Methylbromoacetate (5.7 mL, 0.06 mol) was added to the resulting solution in a single portion. The mixture was heated at reflux for 3 h until the mixture turned into a milky white suspension. Solvent was removed under reduced pressure, and the residue was redissolved in methanol (50 mL) and heated at reflux for 1 h to quench unreacted methylbromoacetate. Solvent was removed under reduced pressure and co-evaporated twice with acetone to remove the last traces of methanol. The gooey solid was triturated with  $\text{Et}_2\text{O}$  ( $3 \times 20$  mL) with mechanical stirring, and dissolved in  $\text{Et}_2\text{O}$  (100 mL) with ammonia in MeOH (7 M, 20 mL) under stirring for 1 h. Solvent was removed under reduced pressure and co-evaporated with DCM under high vacuum. The product was isolated by column chromatography under an isocratic system (2% v/v MeOH in DCM) to give the title compound as a yellow oil (33% yield,  $R_f = 0.35$  in 10% v/v MeOH in DCM).  $^1\text{H}$  NMR (400 MHz,  $\text{CDCl}_3$ ,  $\delta$ ): 6.90 (d,  $J = 1.4$  Hz, 1H), 6.77 (d,  $J = 1.5$  Hz, 1H), 4.56 (s, 2H), 3.71 (s, 3H), 2.55 (q,  $J = 7.5$  Hz, 2H), 1.26 (t,  $J = 7.5$  Hz, 3H).  $^{13}\text{C}$  NMR (101 MHz,  $\text{CDCl}_3$ ,  $\delta$ ): 168.07, 149.68, 127.50, 120.10, 52.71, 46.88, 19.85, 11.71. **HRMS–DART** ( $m/z$ ):  $[\text{M} + \text{H}]^+$  calcd for  $\text{C}_8\text{H}_{13}\text{N}_2\text{O}_2^+$ , 169.0972; found, 169.0972.

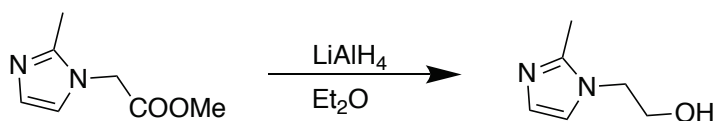

**Synthesis of 2-(2-Methyl-1H-imidazol-1-yl)ethan-1-ol (S11).** Lithium aluminum hydride (0.76 g, 20 mmol) was dissolved in  $\text{Et}_2\text{O}$  (70 mL), and the resulting solution was cooled to  $0^\circ\text{C}$ . The solution was added dropwise to a solution of methyl 2-(2-methyl-1H-imidazol-1-yl)acetate (1.70 g, 11.0 mmol) in  $\text{Et}_2\text{O}$  (40 mL) on ice over 15 min, and allowed to stir at room temperature  $>1$  h. The solution was cooled on an ice bath, and an aqueous solution (3.0 mL) of 1.5 M NaOH was added dropwise with concomitant evolution of heat. Once all the solution was added, the resulting solution was allowed to stir for 30 min, and solvent was removed under reduced pressure. The residue was dissolved in DCM, dried with  $\text{Na}_2\text{SO}_4(\text{s})$ , and filtered. Solvent was removed to afford pure product as an off-pink solid (quantitative).  $^1\text{H}$  NMR (400 MHz,  $\text{CDCl}_3$ ,  $\delta$ ): 6.79 (d,  $J = 1.4$  Hz, 1H), 6.67 (d,  $J = 1.4$  Hz, 1H), 5.93 (s, 1H), 3.91 (t,  $J = 5.1$  Hz, 2H), 3.82 (t,  $J = 5.0$  Hz, 2H), 2.26 (s, 3H).  $^{13}\text{C}$  NMR (101 MHz,  $\text{CDCl}_3$ ,  $\delta$ ): 144.89, 126.58, 119.65, 61.34, 48.97, 13.03. **HRMS–DART** ( $m/z$ ):  $[\text{M} + \text{H}]^+$  calcd for  $\text{C}_6\text{H}_{10}\text{N}_2\text{O}^+$ , 127.0866; found, 127.0870.

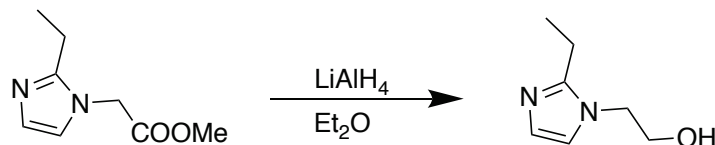

**Synthesis of 2-(2-Ethyl-1H-imidazol-1-yl)ethan-1-ol (S12).** Lithium aluminum hydride (0.76 g, 20.0 mmol) was dissolved in Et<sub>2</sub>O (70 mL), and the resulting solution was cooled to 0 °C. The solution was added dropwise to a solution of methyl 2-(2-methyl-1H-imidazol-1-yl)acetate (1.70 g, 11.0 mmol) in Et<sub>2</sub>O (40 mL) on ice over 15 min, and allowed to stir at room temperature >1 h. The solution was cooled down on an ice bath, and an aqueous solution (3.0 mL) of 1.5 M NaOH was added dropwise with concomitant evolution of heat. Once all the solution was added, it was allowed to stir for 30 min, and solvent was removed under reduced pressure. The residue was dissolved in DCM, dried with Na<sub>2</sub>SO<sub>4</sub>(s), and filtered. Solvent was removed under reduced pressure to afford pure product as an off-yellow solid (quantitative). <sup>1</sup>H NMR (400 MHz, CDCl<sub>3</sub>, δ): 6.82 (d, *J* = 1.4 Hz, 1H), 6.73 (d, *J* = 1.4 Hz, 1H), 5.36 (s, 1H), 3.94 (t, *J* = 5.3 Hz, 2H), 3.83 (t, *J* = 5.3 Hz, 2H), 2.61 (q, *J* = 7.6 Hz, 2H), 1.23 (t, *J* = 7.6 Hz, 3H). <sup>13</sup>C NMR (101 MHz, CDCl<sub>3</sub>, δ): 149.54, 126.70, 119.63, 61.50, 48.49, 20.12, 12.18. HRMS–DART (*m/z*): [M + H]<sup>+</sup> calcd for C<sub>7</sub>H<sub>13</sub>N<sub>2</sub>O<sup>+</sup>, 141.1022; found, 141.1021.

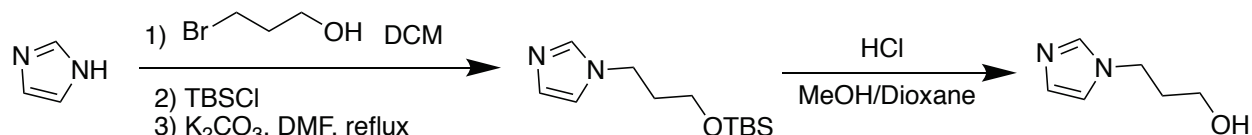

**Synthesis of 3-(1H-imidazol-1-yl)propan-1-ol (S13).** Imidazole (1.50 g, 22.0 mmol) was dissolved in DCM (20 mL) and 3-bromopropanol (1 mL, 11.0 mmol) was added in one portion to this mixture and it was allowed to stir for 3 h. TBSCl (1.66 g, 11.0 mmol) was added in one portion, and allowed to stir overnight. The solvent was removed under reduced pressure with a water bath at room temperature. K<sub>2</sub>CO<sub>3</sub> (5.00 g, 36.1 mmol) was added. The residue was dissolved in DMF (10 mL), and the resulting solution was heated at reflux for 6 h. The reaction mixture was partitioned into DCM and water, the organic layer was washed with a saturated LiCl solution in water (5×), dried with Na<sub>2</sub>SO<sub>4</sub>(s), and filtered. Solvent was removed under reduced pressure, and purified using column chromatography under an isocratic system (6% v/v MeOH in DCM) to give 1-(3-((*tert*-butyldimethylsilyl)oxy)propyl)-1H-imidazole as a volatile yellow semisolid (44% yield, *R<sub>f</sub>* = 0.43 in 6% v/v MeOH in DCM) that was used immediately in the next step. 1-(3-((*tert*-butyldimethylsilyl)oxy)propyl)-1H-imidazole (1.14 g, 4.74 mmol) was dissolved in MeOH (10 mL). 4 M HCl in dioxane (1.5 mL) was added dropwise to the resulting solution, and the mixture was allowed to stir overnight. NaHCO<sub>3</sub>(s) was added until a pH ~8 was attained, and solvent was removed under reduced pressure. The residue was taken up in DCM and removed under reduced pressure. The resulting oil was triturated with hexanes (2×) to afford the title product as a light-orange oil (quantitative). <sup>1</sup>H NMR (500 MHz, CDCl<sub>3</sub>, δ): 7.47 (s, 1H), 7.17–6.85 (m, 2H), 4.12 (t, *J* = 6.7 Hz, 2H), 3.59 (t, *J* = 5.8 Hz, 2H), 3.12 (s, 1H), 1.99 (p, *J* = 6.3 Hz, 2H). <sup>13</sup>C NMR (126 MHz, CDCl<sub>3</sub>, δ): 137.21, 128.59, 119.12, 57.55, 43.55, 33.45. HRMS–DART (*m/z*): [M + H]<sup>+</sup> for C<sub>6</sub>H<sub>11</sub>N<sub>2</sub>O<sup>+</sup>, 127.0866; found, 127.0865.

## Biological Methods

**Esterase Activity Screen with 2-Thiopheneacetic Acid (2TA).** Bacterial cells (*M. smegmatis* mc<sup>2</sup>155, or *E. coli* DH10B) from an overnight culture were inoculated at 1% v/v into 15 mL of Luria–Bertani medium. The resulting culture were grown in a shaking incubator at 37 °C to log phase (OD<sub>600 nm</sub> = 0.4–0.8) and then removed from the shaking incubator. Cells were pelleted by centrifugation at 3260g for 3 min, and the supernatant was discarded. The cell pellet was resuspended in 5 mL of water and pelleted again. The resulting pellet was resuspended in 1.5 mL of water (thereby concentrating the cells 10-fold), and 45 µL of this suspension was combined with 5 µL of ester substrate and 50 µL of 2× assay buffer (which was 10 mM HEPES–NaOH buffer, pH 7.4, containing 8 mM TbCl<sub>3</sub>, 700 µM TOPO, and 0.2% w/v Triton X-100), and the luminescence was measured immediately. A blank solution lacking the analyte but including 45 µL of cell suspension, 5 µL of water, and 50 µL of 2× assay buffer was also prepared in triplicate. A calibration curve was prepared by combining 45 µL of cell suspension, a known amount of 2TA, 50 µL of 2× assay buffer, and water to a final volume of 100 µL. The luminescence of samples, blanks, and calibration-curve solutions was then monitored. The luminescence of the sample solutions was normalized against that of the blank solutions, and the concentration of liberated 2TA in the sample solutions was determined by using the slope of the calibration curve.

**General Procedure for Viability Assay with Resazurin Dye.** A 5-mL culture of bacterial cells was inoculated from a single colony taken from solid medium. The culture was allowed to grow overnight. Then, the OD<sub>600 nm</sub> was measured, and the culture was diluted to OD<sub>600 nm</sub> = 0.02 (for *E. coli* and *B. subtilis*) or 0.04 (for *M. smegmatis*). Stocks of compounds to be tested were prepared at 50 mM in DMSO and then diluted to 1 mM working stocks in medium. To each well of a sterile 96-well plate, 10 µL of resazurin dye (AlamarBlue from Bio-Rad Laboratories) was added, and then the appropriate amount of compound working stock was added to designated wells. Medium was added as needed to bring the volume of each well to 20 µL, then 80 µL of diluted overnight culture was added to each well. The plate was then sealed with clear polyolefin sealing tape (Thermo Fisher Scientific) and placed in the plate reader, pre-heated to 37 °C. The plate reader was programmed to shake the plate for 3 s before every measurement and take measurements every 2–3 min with an excitation wavelength of 545 nm and emission wavelength of 590 nm.

**Determination of Sulfurol Ester Cleavage in Bacterial Lysates.** To prepare bacterial lysate, a 5-mL culture of bacterial cells was inoculated from a single colony taken from solid medium. The culture was allowed to grow overnight and then lysed with a Qsonica sonicator set to 80% amplitude using 10 cycles of 1 s on, 1 s off.

To determine the accuracy and recovery of the methodology, authentic solutions of sulfurol ester, sulfurol, and *trans*-3-(4-chlorobenzoyl)acrylic acid were spiked into cell lysate in the concentrations described in the table below. Stock solutions of sulfurol esters was prepared at a concentration of 50 mM in DMSO, and stock solutions of sulfurol and *trans*-3-(4-chlorobenzoyl)acrylic acid were prepared at a concentration of 100 µM in DMSO. Aliquots (10 µL) of these stock solutions were then added to 1.5-mL sterile Eppendorf tube, and 490 µL of lysate was added to yield a total volume of 500 µL and the targeted concentrations. A blank sample was prepared by combining 10 µL of DMSO and 490 µL of lysate. Each tube was then mixed by inversion, and 300 µL of dichloromethane was added immediately to each tube to extract the spiked compounds. The tubes were mixed by inversion, and the dichloromethane was allowed to settle to the bottom. A pipettor was used to extract 150 µL of the settled dichloromethane and

transfer it into a fresh 1.5- $\mu$ L Eppendorf tube. The solvent was removed under a stream of  $N_2(g)$ , and 75  $\mu$ L of 1:1 acetonitrile/water were then added to each tube. The tube was mixed vigorously by vortexing and then subjected to centrifugation at 23100g for 3 min. Following centrifugation, 50  $\mu$ L was transferred to an HPLC vial equipped with a vial insert.

| % hydrolyzed | [sulfurol ester] ( $\mu$ M) | [sulfurol] ( $\mu$ M) | [ <i>trans</i> -3-(4-chlorobenzoyl)acrylic acid] ( $\mu$ M) |
|--------------|-----------------------------|-----------------------|-------------------------------------------------------------|
| 0            | 200                         | 0                     | 0                                                           |
| 10           | 180                         | 20                    | 20                                                          |
| 25           | 150                         | 50                    | 50                                                          |
| 50           | 100                         | 100                   | 100                                                         |
| 75           | 50                          | 150                   | 150                                                         |
| 90           | 20                          | 180                   | 180                                                         |
| 100          | 0                           | 200                   | 200                                                         |

Samples to determine the extent of hydrolysis in the lysate were prepared by adding 490  $\mu$ L of lysate to a 1.5-mL Eppendorf vial and then adding sulfurol ester in DMSO to a final concentration of 200  $\mu$ M. The volume was brought to 500  $\mu$ L with DMSO to match the total volume of DMSO that was used to obtain the standard curve. The vial was then incubated at 37  $^{\circ}$ C for 2 h. After incubation, 300  $\mu$ L of dichloromethane was added to each vial. The vials were mixed with inversion, and the dichloromethane was allowed to settle to the bottom. A pipettor was used to extract 150  $\mu$ L of the settled dichloromethane and transfer it into a fresh 1.5- $\mu$ L Eppendorf tube. The solvent was removed under a stream of  $N_2(g)$ , and 75  $\mu$ L of 1:1 acetonitrile/water were then added to each tube. The tube was mixed vigorously by vortexing and then pelleted via centrifugation at 23100g for 3 min. Following centrifugation, 50  $\mu$ L was transferred to an HPLC vial equipped with a vial insert.

Samples and calibration samples were transferred to the LC–MS instrument. Separation was achieved on an Agilent Poroshell 120 SB C18 (50 mm  $\times$  2.1 mm i.d., 2.7  $\mu$ m pore size) running a linear gradient of 0.1% v/v formic acid in 90:10 to 10:90 water/acetonitrile over 6 min, followed by a 1-min equilibration at the initial conditions.

Calibration curves and hydrolysis samples were prepared in the above manner in lysate from *E. coli* DH10B, *B. subtilis* OI1085, and *M. smegmatis* mc<sup>2</sup>155. Peaks correlating to the sulfurol ester, sulfurol, or *trans*-3-(4-chlorobenzoyl)acrylic acid were integrated using SpectraGryph software. The acid peak was found to be too variable, particularly from *M. smegmatis* lysate, for reliable quantification (see: Figure S8); however, the ratio of the area of the sulfurol ester to the sulfurol peak was found to be linear in all lysates from 25–100% hydrolyzed (Figure S7), where % hydrolyzed was calculated as moles of sulfurol divided by moles of sulfurol ester. These calibration curves were then used to determine the % hydrolyzed in the samples.

**Determination of Minimum Inhibitory Concentration.** A 5-mL culture of bacterial cells was inoculated from a single colony taken from solid medium and allowed to grow overnight. After overnight growth, the bacteria was diluted to OD<sub>600 nm</sub> 0.02–0.04. Wells were prepared in triplicate. Solutions of antibiotic were prepared at a 50 mM concentration in DMSO then diluted to 0.5 mM in medium. Final antibiotic compound concentrations were 400, 300, 200, 100, and 50  $\mu$ M. Control wells containing no antibiotic and medium alone were also prepared and monitored to ensure bacterial cell growth and non-contamination, respectively. The OD<sub>600 nm</sub> was determined at the initial time point and after 24 h. For *M. smegmatis*, an additional 30-h time point was taken due to slower growth of *M. smegmatis* cells. Values for the MIC of acid **1** and sulfurol ester **3** were

>400  $\mu\text{M}$  for *E. coli* DH10B, 400 and 200  $\mu\text{M}$  (respectively) for *B. subtilis* OI1085, and >400 and 300  $\mu\text{M}$  (respectively) for *M. smegmatis* mc2155. Notably, the solubility limit of sulfurol ester **3** was 400  $\mu\text{M}$ .

**Creation of Sequence Similarity Network (SSN).** Annotated carboxylesterase enzymes were identified by searching the NCBI protein database using the search term “carboxylesterase” and the desired species (*Bacillus subtilis* subsp. subtilis str. 168, *Escherichia coli* str. K-12 substr. DH10B, or *Mycobacterium smegmatis* MC2 155). The resulting sequences were analyzed with the Enzyme Function Initiative’s Enzyme Similarity Tool (EFI-EST; <http://efi.igb.illinois.edu/efi-est/index.php>)<sup>2</sup> and subsequently analyzed using Cytoscape 3.8.1.<sup>3</sup> To determine the appropriate edge threshold, E-values were tested in increments of 5 ranging from 15 to 85 (Figure S9). In the range from 35–80, one and only one esterase from *B. subtilis* was observed to persist in a cluster containing esterases from *M. smegmatis* as well. Therefore, a final threshold was set at 37, which is just above the E-value at which multiple clusters exhibited esterases from both *M. smegmatis* and *B. subtilis* but unlikely to be too discriminatory.

**Creation of pET22b-pnbA and pET22b-MSmegEsterase.** A culture of *B. subtilis* subsp. *subtilis* 168 cells was inoculated from a single colony on an LB agar plate. The culture was grown overnight, then 1.5 mL was pelleted by centrifugation at 23100g. The spent medium was removed by aspiration, and the pellet was resuspended in 50  $\mu\text{L}$  of DMSO. The resuspended pellet was held at 98 °C for 5 min to lyse the bacteria and liberate genomic DNA. The mixture was then cooled to room temperature and pelleted again at 23100g for 5 min to remove cellular debris. The supernatant was removed and saved for use as template DNA. The *pnbA* gene was cloned by the polymerase chain reaction (PCR) using primers pnbA\_fp and pnbA\_rp. The PCR reaction product was purified by using a GeneJET PCR purification kit from Thermo Fisher Scientific. Empty plasmid pET-22b(+) (Novagen) was digested with *Sall*-HF (NEB) and *NdeI* (NEB) as per the manufacturer’s directions, and the restriction enzymes were heat-inactivated. The *pnbA* PCR product was then combined with the digested vector in an isothermal assembly with Gibson Assembly 2 $\times$  Master Mix (NEB) to yield pET22b-pnbA.

Using the same technique, pET22b-MSmegEsterase was created by inoculating a culture from a single colony taken from an 7H10 agar plate and growing overnight. From this culture, 1.5 mL was pelleted by centrifugation at 23100g. The spent medium was removed by aspiration, and the pellet was resuspended in 50  $\mu\text{L}$  of DMSO. The resuspended pellet was held at 98 °C for 5 min to lyse the bacteria and liberate the genomic DNA. The mixture was then cooled to room temperature and pelleted again at 23100g for 5 min to remove cellular debris. The supernatant was removed and saved for use as template DNA. The gene encoding A0QYI2 was cloned by the PCR using primers A0QYI2\_f and A0QYI2\_r. The PCR reaction product was purified by using a GeneJET PCR purification kit from Thermo Fisher Scientific. Empty plasmid pET-22b(+) (Novagen) was digested with *Sall*-HF (NEB) and *NdeI* (NEB) as per the manufacturer’s directions, and the restriction enzymes were heat-inactivated. The PCR product encoding A0QYI2 was then combined with the digested vector in an isothermal assembly with Gibson Assembly 2 $\times$  Master Mix (NEB) to yield pET22b-MSmegEsterase.

### Primers (5'→3')

pnbA\_fp: GTTTAACTTTAAGAAGGAGATATACATATGACTCATCAAATAGTAACG

pnbA\_rp: GCGGCCGCAAGCTTGTCGACTTATTCTCCTTTTGAAGGG

A0QYI2\_f: tttgtttaactttaagaaggagatatacatATGGCGAACGCCCGCCGGATC

A0QYI2\_r: ggtgctcgagtgccggccgaagcttgctcgaTTACCGGAAGTTGAGTACCTGGTCACCCC

**Heterologous Expression of Esterases in *E. coli* DH10B.** Chemically competent *E. coli* DH10B was transformed with plasmids pET22b-pnbA and pCS6 or pET22b-MSmegEsterase. Plasmid pCS6 was a gift from Matthew Bennett (Addgene plasmid #55752; <http://n2t.net/addgene:55752>; RRID:Addgene\_55752) and directs the expression of a gene encoding T7 RNA polymerase (T7RNAP) under the control of an arabinose promoter.<sup>4</sup> Transformants were plated on LB agar medium containing ampicillin (100 µg/mL) and spectinomycin (25 µg/mL). An overnight culture was inoculated in LB medium containing ampicillin (100 µg/mL), spectinomycin (25 µg/mL), and glucose (2% w/v). From this overnight, cultures for viability assays were inoculated to OD<sub>600 nm</sub> = 0.02. Cultures intended for “leaky” expression contained CAMHB, ampicillin (100 µg/mL), and spectinomycin (25 µg/mL). Cultures intended for expression contained ampicillin (100 µg/mL), spectinomycin (25 µg/mL), and arabinose (0.05% w/v).

To generate a control strain that expressed T7RNAP but not pnbA, the procedure described above was followed except that empty pET-22b(+) was used instead of pET22b-pnbA.

**Lysates of pnbA-Expressing *E. coli* DH10B.** *E. coli* DH10B cells expressing the esterase from either *M. smegmatis* mc<sup>2</sup>155 or *B. subtilis* subsp. *subtilis* 168 were lysed as described above. As a control, *E. coli* DH10B cells expressing pCS6 and empty pET-22b(+) were treated in the same manner.

**Nonlinear Regression Fit of Viability Curves.** Fits were performed with R software using the minpack.lm nonlinear least-squares regression package. Data were fitted to eq 1, where  $a$  = the upper asymptote,  $v$  = parameter affecting near which asymptote the maximum growth occurs,  $k$  = the growth rate, and  $l$  = the point of inflection on the ordinate. The variable  $t$  represents the time in minutes and is plotted on the ordinate. The fit was used solely to determine the ordinate inflection point (variable  $l$ ), and no conclusions about growth rates were drawn from the fit.

$$\text{RFU} = a(l + ve^{k(l-t)})^{(-1/v)} \quad (1)$$

**Table S1. Annotated Carboxylesterases in the Sequence Similarity Network in Figure 3A. Each Carboxylesterase is Indicated in Figure 3A as a Circle or “Node.” A UniProt ID can be Associated with Multiple NCBI IDs with Identical Protein Sequences.**

| UniProt ID | Organism                                                               | PFAM            | Description                               | Associated NCBI IDs                                       |
|------------|------------------------------------------------------------------------|-----------------|-------------------------------------------|-----------------------------------------------------------|
| P96688     | <i>Bacillus subtilis</i> (strain 168)                                  | PF12697         | Uncharacterized carboxylesterase nap      | NP_388425.1 BAA19378.1 CAB12351.1 P96688.1 WP_003242638.1 |
| P94407     | <i>Bacillus subtilis</i> (strain 168)                                  | PF00561         | AB hydrolase superfamily protein YcIE     | CAB12160.2 P94407.2 WP_003246662.1 NP_388248.2            |
| P94396     | <i>Bacillus subtilis</i> (strain 168)                                  | PF00561         | Uncharacterized hydrolase YegS            | P94396.2 WP_003246384.1 CAB12120.1 NP_388208.1            |
| P70981     | <i>Bacillus subtilis</i> (strain 168)                                  | PF12146         | Probable aminopeptidase YbaC              | WP_003235060.1 BAA11005.1 P70981.2 NP_387995.2 CAB11890.2 |
| P70948     | <i>Bacillus subtilis</i> (strain 168)                                  | PF00326         | Putative esterase YitV                    | NP_388996.1 CAB12955.1                                    |
| P54549     | <i>Bacillus subtilis</i> (strain 168)                                  | PF12146         | Uncharacterized protein YqjL              | P54549.1 CAB14315.1 NP_390264.1 WP_003230373.1            |
| P37967     | <i>Bacillus subtilis</i> (strain 168)                                  | PF00135         | Para-nitrobenzyl esterase                 | WP_003243926.1 P37967.2 AAB39889.1 NP_391319.1 CAB15444.1 |
| O52202     | <i>Mycobacterium smegmatis</i>                                         | None            | Uncharacterized protein                   | AAB96637.1                                                |
| O34592     | <i>Bacillus subtilis</i> (strain 168)                                  | PF12697         | AB hydrolase superfamily protein Ydjp     | CAB12447.1 O34592.1 NP_388509.1 WP_003244040.1            |
| O32234     | <i>Bacillus subtilis</i> (strain 168)                                  | PF00561         | AB hydrolase superfamily protein YvaM     | O32234.1 CAB15369.1 NP_391244.1 WP_003228381.1            |
| O32232     | <i>Bacillus subtilis</i> (strain 168)                                  | PF12146         | Carboxylesterase                          | WP_003242610.1 CAB15367.2 O32232.2                        |
| O31581     | <i>Bacillus subtilis</i> (strain 168)                                  | PF00561         | AB hydrolase superfamily protein YfhM     | NP_388739.1 WP_003243419.1 O31581.1 CAB12687.1            |
| O31452     | <i>Bacillus subtilis</i> (strain 168)                                  | PF12697         | Carboxylesterase YbfK                     | CAB12020.1 NP_388108.1 O31452.1 BAA33123.1 WP_003246261.1 |
| O31431     | <i>Bacillus subtilis</i> (strain 168)                                  | PF00561         | Uncharacterized protein YbdG              | BAA33096.1 WP_003234896.1 CAB11993.2 O31431.2 NP_388081.2 |
| O07937     | <i>Bacillus subtilis</i> (strain 168)                                  | PF00561         | Uncharacterized hydrolase YraK            | NP_390568.2 CAB14632.2 O07937.2 WP_003229849.1            |
| O07015     | <i>Bacillus subtilis</i> (strain 168)                                  | PF12697         | Sigma factor SigB regulation protein RsbQ | CAB15415.1 O07015.1 WP_003228292.1 NP_391290.1            |
| O06734     | <i>Bacillus subtilis</i> (strain 168)                                  | PF00561 PF08386 | AB hydrolase superfamily protein YisY     | NP_388971.1 WP_003245141.1 CAB12930.1 O06734.1            |
| O05235     | <i>Bacillus subtilis</i> (strain 168)                                  | PF00561 PF08386 | Uncharacterized hydrolase YugF            | CAB07918.1 O05235.1 NP_391020.1 CAB15131.1 WP_003228858.1 |
| I7GGN0     | <i>Mycobacterium smegmatis</i> (strain ATCC 700084 / mc <sup>2</sup> ) | PF00561         | Alpha/beta hydrolase fold protein         | AFP42964.1                                                |
| I7GGJ9     | <i>Mycobacterium smegmatis</i> (strain ATCC 700084 / mc <sup>2</sup> ) | PF12697         | Alpha/beta fold hydrolase                 | AFP42834.1                                                |

|        |                                                                                 |                     |                                                                                 |                           |
|--------|---------------------------------------------------------------------------------|---------------------|---------------------------------------------------------------------------------|---------------------------|
| I7GGB1 | <i>Mycoliticibacterium smegmatis</i><br>(strain ATCC 700084 / mc <sup>2</sup> ) | PF00135             | Carboxylic ester hydrolase                                                      | AFP42569.1                |
| I7GG82 | <i>Mycoliticibacterium smegmatis</i><br>(strain ATCC 700084 / mc <sup>2</sup> ) | PF06441             | Epoxide hydrolase                                                               | AFP43101.1                |
| I7GFL3 | <i>Mycoliticibacterium smegmatis</i><br>(strain ATCC 700084 / mc <sup>2</sup> ) | PF06441             | Epoxide hydrolase                                                               | AFP41949.1                |
| I7GE94 | <i>Mycoliticibacterium smegmatis</i><br>(strain ATCC 700084 / mc <sup>2</sup> ) | PF12697             | Alpha/beta hydrolase fold protein                                               | AFP41184.1                |
| I7GCR4 | <i>Mycoliticibacterium smegmatis</i><br>(strain ATCC 700084 / mc <sup>2</sup> ) | PF00561             | Alpha/beta hydrolase fold protein                                               | AFP41041.1 WP_011730025.1 |
| I7GCD6 | <i>Mycoliticibacterium smegmatis</i><br>(strain ATCC 700084 / mc <sup>2</sup> ) | PF00561             | Alpha/beta hydrolase fold protein                                               | AFP40259.1                |
| I7GBY1 | <i>Mycoliticibacterium smegmatis</i><br>(strain ATCC 700084 / mc <sup>2</sup> ) | PF12697             | Alpha/beta hydrolase fold protein                                               | AFP43147.1                |
| I7GBL2 | <i>Mycoliticibacterium smegmatis</i><br>(strain ATCC 700084 / mc <sup>2</sup> ) | PF00561             | Alpha/beta hydrolase fold protein                                               | WP_011731517.1 AFP43007.1 |
| I7GBG7 | <i>Mycoliticibacterium smegmatis</i><br>(strain ATCC 700084 / mc <sup>2</sup> ) | PF00561             | Haloacetate dehalogenase H-1                                                    | WP_011731476.1 AFP42952.1 |
| I7GAN5 | <i>Mycoliticibacterium smegmatis</i><br>(strain ATCC 700084 / mc <sup>2</sup> ) | PF00135             | Carboxylic ester hydrolase                                                      | AFP40216.1 WP_011729367.1 |
| I7G9U1 | <i>Mycoliticibacterium smegmatis</i><br>(strain ATCC 700084 / mc <sup>2</sup> ) | PF00561             | Alpha/beta hydrolase fold protein                                               | AFP39891.1                |
| I7G952 | <i>Mycoliticibacterium smegmatis</i><br>(strain ATCC 700084 / mc <sup>2</sup> ) | PF12697             | Alpha/beta hydrolase fold protein                                               | AFP39716.1                |
| I7G7E3 | <i>Mycoliticibacterium smegmatis</i><br>(strain ATCC 700084 / mc <sup>2</sup> ) | PF00561             | Alpha/beta hydrolase fold protein                                               | AFP39176.1 WP_011728576.1 |
| I7G7D2 | <i>Mycoliticibacterium smegmatis</i><br>(strain ATCC 700084 / mc <sup>2</sup> ) | PF12697             | AB hydrolase-1 domain-containing protein                                        | AFP39166.1                |
| I7G720 | <i>Mycoliticibacterium smegmatis</i><br>(strain ATCC 700084 / mc <sup>2</sup> ) | PF12697             | Putative peroxidase (Non-heme peroxidase) [BpoB]<br>alpha/beta hydrolase family | AFP41517.1 WP_011730384.1 |
| I7G6F9 | <i>Mycoliticibacterium smegmatis</i><br>(strain ATCC 700084 / mc <sup>2</sup> ) | PF12697             | Salicylate esterase                                                             | AFP38224.1 WP_011727914.1 |
| I7G5M0 | <i>Mycoliticibacterium smegmatis</i><br>(strain ATCC 700084 / mc <sup>2</sup> ) | PF00135             | Carboxylic ester hydrolase                                                      | WP_011727668.1 AFP37869.1 |
| I7G5G0 | <i>Mycoliticibacterium smegmatis</i><br>(strain ATCC 700084 / mc <sup>2</sup> ) | PF00561             | Alpha/beta hydrolase fold protein                                               | AFP38411.1                |
| I7G5A2 | <i>Mycoliticibacterium smegmatis</i><br>(strain ATCC 700084 / mc <sup>2</sup> ) | PF00211 <br>PF00561 | Lignin peroxidase LipJ                                                          | AFP40822.1                |
| I7G4B5 | <i>Mycoliticibacterium smegmatis</i><br>(strain ATCC 700084 / mc <sup>2</sup> ) | PF12146             | Alpha/beta hydrolase fold protein                                               | AFP38011.1                |
| I7G3B1 | <i>Mycoliticibacterium smegmatis</i><br>(strain ATCC 700084 / mc <sup>2</sup> ) | PF00135             | Carboxylic ester hydrolase                                                      | WP_011726970.1            |
| I7G317 | <i>Mycoliticibacterium smegmatis</i><br>(strain ATCC 700084 / mc <sup>2</sup> ) | PF12697             | Bromoperoxidase BpoC                                                            | WP_014876968.1 AFP37556.1 |



|        |                                                                               |                     |                                         |                           |
|--------|-------------------------------------------------------------------------------|---------------------|-----------------------------------------|---------------------------|
| I7G2M2 | <i>Mycolicibacterium smegmatis</i><br>(strain ATCC 700084 / mc <sup>2</sup> ) | PF06441             | Epoxide hydrolase                       | WP_011726720.1 AFP36659.1 |
| I7G234 | <i>Mycolicibacterium smegmatis</i><br>(strain ATCC 700084 / mc <sup>2</sup> ) | PF00135             | Carboxylic ester hydrolase              | WP_011727065.1 AFP37076.1 |
| I7G086 | <i>Mycolicibacterium smegmatis</i><br>(strain ATCC 700084 / mc <sup>2</sup> ) | PF12697             | Putative hydrolase                      | AFP38942.1                |
| I7FXZ7 | <i>Mycolicibacterium smegmatis</i><br>(strain ATCC 700084 / mc <sup>2</sup> ) | PF00561             | Lipase/esterase lipG                    | AFP37787.1                |
| I7FVK9 | <i>Mycolicibacterium smegmatis</i><br>(strain ATCC 700084 / mc <sup>2</sup> ) | PF00561             | Alpha/beta hydrolase fold protein       | AFP42963.1 WP_011731487.1 |
| I7FP61 | <i>Mycolicibacterium smegmatis</i><br>(strain ATCC 700084 / mc <sup>2</sup> ) | PF12697             | Alpha/beta hydrolase fold protein       | AFP43075.1 WP_011731568.1 |
| I7FP13 | <i>Mycolicibacterium smegmatis</i><br>(strain ATCC 700084 / mc <sup>2</sup> ) | PF12697             | Alpha/beta hydrolase fold protein       | AFP40438.1 WP_011729531.1 |
| I7FNE2 | <i>Mycolicibacterium smegmatis</i><br>(strain ATCC 700084 / mc <sup>2</sup> ) | PF00486 <br>PF00561 | Alpha/beta hydrolase fold protein       | AFP40223.1                |
| I7FMU7 | <i>Mycolicibacterium smegmatis</i><br>(strain ATCC 700084 / mc <sup>2</sup> ) | PF00135             | Carboxylesterase                        | AFP40043.1                |
| I7FMD4 | <i>Mycolicibacterium smegmatis</i><br>(strain ATCC 700084 / mc <sup>2</sup> ) | PF00561             | Epoxide hydrolase EphE                  | AFP42455.1                |
| I7FM79 | <i>Mycolicibacterium smegmatis</i><br>(strain ATCC 700084 / mc <sup>2</sup> ) | PF00561             | Epoxide hydrolase EphA                  | WP_011731041.1 AFP42380.1 |
| I7FM61 | <i>Mycolicibacterium smegmatis</i><br>(strain ATCC 700084 / mc <sup>2</sup> ) | PF12697             | Alpha/beta hydrolase fold protein       | AFP42360.1                |
| I7FJS6 | <i>Mycolicibacterium smegmatis</i><br>(strain ATCC 700084 / mc <sup>2</sup> ) | None                | Conserved hypothetical membrane protein | AFP38998.1                |
| I7FID2 | <i>Mycolicibacterium smegmatis</i><br>(strain ATCC 700084 / mc <sup>2</sup> ) | None                | Uncharacterized protein                 | AFP41135.1                |
| I7FGW1 | <i>Mycolicibacterium smegmatis</i><br>(strain ATCC 700084 / mc <sup>2</sup> ) | PF12697             | Alpha/beta hydrolase fold protein       | WP_011727803.1 AFP38088.1 |
| I7FGP2 | <i>Mycolicibacterium smegmatis</i><br>(strain ATCC 700084 / mc <sup>2</sup> ) | PF00561             | Alpha/beta hydrolase fold protein       | AFP38023.1                |
| I7FDF1 | <i>Mycolicibacterium smegmatis</i><br>(strain ATCC 700084 / mc <sup>2</sup> ) | PF12697             | Alpha/beta hydrolase fold protein       | AFP36928.1                |
| I7FD31 | <i>Mycolicibacterium smegmatis</i><br>(strain ATCC 700084 / mc <sup>2</sup> ) | PF00135             | Carboxylic ester hydrolase              | AFP39390.1                |
| I7FCR0 | <i>Mycolicibacterium smegmatis</i><br>(strain ATCC 700084 / mc <sup>2</sup> ) | PF00561             | Alpha/beta hydrolase fold protein       | AFP39305.1                |
| I7FC89 | <i>Mycolicibacterium smegmatis</i><br>(strain ATCC 700084 / mc <sup>2</sup> ) | PF12697             | Alpha/beta hydrolase fold protein       | AFP39145.1                |
| I7FBN9 | <i>Mycolicibacterium smegmatis</i><br>(strain ATCC 700084 / mc <sup>2</sup> ) | PF00561             | Alpha/beta hydrolase fold protein       | AFP38925.1                |
| I7FA07 | <i>Mycolicibacterium smegmatis</i><br>(strain ATCC 700084 / mc <sup>2</sup> ) | PF12697             | Putative hydrolase alpha/beta fold LipV | AFP38370.1                |

|        |                                                                               |         |                                                       |                           |
|--------|-------------------------------------------------------------------------------|---------|-------------------------------------------------------|---------------------------|
| I7F8W6 | <i>Mycolicibacterium smegmatis</i><br>(strain ATCC 700084 / mc <sup>2</sup> ) | PF12697 | Carboxylesterase                                      | AFP38005.1                |
| C4ZUR7 | <i>Escherichia coli</i><br>(strain K12 / MC4100 / BW2952)                     | PF00561 | Pimeloyl-[acyl-carrier protein] methyl ester esterase | WP_001060070.1            |
| B1X758 | <i>Escherichia coli</i><br>(strain K12 / DH10B)                               | PF00561 | Pimeloyl-[acyl-carrier protein] methyl ester esterase | B1X758.1 ACB04470.1       |
| A0R7G7 | <i>Mycolicibacterium smegmatis</i><br>(strain ATCC 700084 / mc <sup>2</sup> ) | PF12697 | Putative hydrolase                                    | ABK71430.1 WP_011731621.1 |
| A0R7C4 | <i>Mycolicibacterium smegmatis</i><br>(strain ATCC 700084 / mc <sup>2</sup> ) | PF06441 | Epoxide hydrolase 1                                   | ABK74036.1                |
| A0R797 | <i>Mycolicibacterium smegmatis</i><br>(strain ATCC 700084 / mc <sup>2</sup> ) | PF12697 | Hydrolase  alpha/beta hydrolase fold family protein   | ABK71718.1                |
| A0R733 | <i>Mycolicibacterium smegmatis</i><br>(strain ATCC 700084 / mc <sup>2</sup> ) | PF00561 | Oxidoreductase                                        | ABK74727.1                |
| A0R6Z0 | <i>Mycolicibacterium smegmatis</i><br>(strain ATCC 700084 / mc <sup>2</sup> ) | PF00561 | Epoxide hydrolase                                     | WP_011731488.1 ABK74436.1 |
| A0R6Y9 | <i>Mycolicibacterium smegmatis</i><br>(strain ATCC 700084 / mc <sup>2</sup> ) | PF00561 | Epoxide hydrolase                                     | ABK73666.1                |
| A0R6X8 | <i>Mycolicibacterium smegmatis</i><br>(strain ATCC 700084 / mc <sup>2</sup> ) | PF00561 | Epoxide hydrolase                                     | ABK72816.1                |
| A0R6L0 | <i>Mycolicibacterium smegmatis</i><br>(strain ATCC 700084 / mc <sup>2</sup> ) | PF12697 | Alpha/beta hydrolase  putative                        | WP_011731381.1 ABK70030.1 |
| A0R619 | <i>Mycolicibacterium smegmatis</i><br>(strain ATCC 700084 / mc <sup>2</sup> ) | PF01083 | Cutinase domain-containing protein                    | A0R619.1                  |
| A0R5T4 | <i>Mycolicibacterium smegmatis</i><br>(strain ATCC 700084 / mc <sup>2</sup> ) | PF00135 | Carboxylic ester hydrolase                            | WP_011731192.1            |
| A0R5G5 | <i>Mycolicibacterium smegmatis</i><br>(strain ATCC 700084 / mc <sup>2</sup> ) | PF00561 | Hydrolase  alpha/beta fold family protein             | ABK73054.1 WP_011731100.1 |
| A0R589 | <i>Mycolicibacterium smegmatis</i><br>(strain ATCC 700084 / mc <sup>2</sup> ) | PF00561 | Epoxide hydrolase                                     | ABK70428.1                |
| A0R568 | <i>Mycolicibacterium smegmatis</i><br>(strain ATCC 700084 / mc <sup>2</sup> ) | PF12697 | Hydrolase  alpha/beta hydrolase fold family protein   | WP_011731027.1 ABK70319.1 |
| A0R403 | <i>Mycolicibacterium smegmatis</i><br>(strain ATCC 700084 / mc <sup>2</sup> ) | PF06441 | Epoxide hydrolase                                     | ABK72315.1                |
| A0R2R7 | <i>Mycolicibacterium smegmatis</i><br>(strain ATCC 700084 / mc <sup>2</sup> ) | PF12697 | Hydrolase  alpha/beta fold family protein             | ABK74195.1                |
| A0R1M8 | <i>Mycolicibacterium smegmatis</i><br>(strain ATCC 700084 / mc <sup>2</sup> ) | None    | Uncharacterized protein                               | WP_011730102.1 ABK74316.1 |
| A0R1C9 | <i>Mycolicibacterium smegmatis</i><br>(strain ATCC 700084 / mc <sup>2</sup> ) | PF00561 | Non-heme bromoperoxidase BPO-A2                       | ABK71131.1                |
| A0R1A3 | <i>Mycolicibacterium smegmatis</i><br>(strain ATCC 700084 / mc <sup>2</sup> ) | PF00144 | Carboxylesterase  putative                            | ABK71637.1                |

|        |                                                                               |                 |                                                     |                           |
|--------|-------------------------------------------------------------------------------|-----------------|-----------------------------------------------------|---------------------------|
| A0R0R2 | <i>Mycolicibacterium smegmatis</i><br>(strain ATCC 700084 / mc <sup>2</sup> ) | PF00211 PF00561 | Hydrolase  alpha/beta hydrolase fold family protein | ABK75261.1 WP_011729865.1 |
| A0QZM4 | <i>Mycolicibacterium smegmatis</i><br>(strain ATCC 700084 / mc <sup>2</sup> ) | PF12697         | Putative hydrolase                                  | ABK72475.1                |
| A0QZ43 | <i>Mycolicibacterium smegmatis</i><br>(strain ATCC 700084 / mc <sup>2</sup> ) | PF00561         | Hydrolase                                           | ABK74851.1 WP_011729398.1 |
| A0QZ01 | <i>Mycolicibacterium smegmatis</i><br>(strain ATCC 700084 / mc <sup>2</sup> ) | PF00135         | Carboxylic ester hydrolase                          | ABK75312.1                |
| A0QY12 | <i>Mycolicibacterium smegmatis</i><br>(strain ATCC 700084 / mc <sup>2</sup> ) | PF00135         | Carboxylic ester hydrolase                          | WP_011729246.1 ABK69668.1 |
| A0QY24 | <i>Mycolicibacterium smegmatis</i><br>(strain ATCC 700084 / mc <sup>2</sup> ) | PF00561         | Hydrolase  alpha/beta hydrolase fold family protein | ABK71451.1                |
| A0QXK5 | <i>Mycolicibacterium smegmatis</i><br>(strain ATCC 700084 / mc <sup>2</sup> ) | PF12697         | Hydrolase                                           | ABK73823.1 WP_011728989.1 |
| A0QWN1 | <i>Mycolicibacterium smegmatis</i><br>(strain ATCC 700084 / mc <sup>2</sup> ) | PF00135         | Carboxylic ester hydrolase                          | WP_011728750.1 ABK73819.1 |
| A0QWE5 | <i>Mycolicibacterium smegmatis</i><br>(strain ATCC 700084 / mc <sup>2</sup> ) | PF00561         | Hydrolase                                           | ABK69734.1 WP_011728682.1 |
| A0QW20 | <i>Mycolicibacterium smegmatis</i><br>(strain ATCC 700084 / mc <sup>2</sup> ) | PF00561         | Alpha/beta hydrolase fold                           | ABK72302.1                |
| A0QW10 | <i>Mycolicibacterium smegmatis</i><br>(strain ATCC 700084 / mc <sup>2</sup> ) | PF12697         | AB hydrolase-1 domain-containing protein            | WP_011728568.1 ABK70069.1 |
| A0QVJ1 | <i>Mycolicibacterium smegmatis</i><br>(strain ATCC 700084 / mc <sup>2</sup> ) | None            | Uncharacterized protein                             | WP_011728457.1 ABK75569.1 |
| A0QVD3 | <i>Mycolicibacterium smegmatis</i><br>(strain ATCC 700084 / mc <sup>2</sup> ) | PF12697         | Putative carboxylesterase protein                   | ABK74379.1 WP_011728413.1 |
| A0QVB5 | <i>Mycolicibacterium smegmatis</i><br>(strain ATCC 700084 / mc <sup>2</sup> ) | PF00561         | Hydrolase  alpha/beta fold family protein  putative | WP_011728396.1 ABK76041.1 |
| A0QTW0 | <i>Mycolicibacterium smegmatis</i><br>(strain ATCC 700084 / mc <sup>2</sup> ) | PF00561         | Haloacetate dehalogenase H-1                        | ABK70097.1 WP_011728061.1 |
| A0QTR8 | <i>Mycolicibacterium smegmatis</i><br>(strain ATCC 700084 / mc <sup>2</sup> ) | PF12697         | Hydrolase  alpha/beta fold family protein           | ABK72057.1 WP_011728027.1 |
| A0QTD1 | <i>Mycolicibacterium smegmatis</i><br>(strain ATCC 700084 / mc <sup>2</sup> ) | PF12697         | Salicylate esterase                                 | ABK72895.1                |
| A0QSZ4 | <i>Mycolicibacterium smegmatis</i><br>(strain ATCC 700084 / mc <sup>2</sup> ) | PF12697         | Hydrolase  alpha/beta fold family protein  putative | ABK73343.1                |
| A0QSS9 | <i>Mycolicibacterium smegmatis</i><br>(strain ATCC 700084 / mc <sup>2</sup> ) | PF00561         | Alpha/beta hydrolase fold                           | WP_011727758.1 ABK70732.1 |
| A0QSR7 | <i>Mycolicibacterium smegmatis</i><br>(strain ATCC 700084 / mc <sup>2</sup> ) | PF12146         | Alpha/beta hydrolase fold                           | WP_011727748.1 ABK75088.1 |
| A0QSR0 | <i>Mycolicibacterium smegmatis</i><br>(strain ATCC 700084 / mc <sup>2</sup> ) | PF12697         | Carboxylesterase                                    | ABK72861.1 WP_011727741.1 |
| A0QSC7 | <i>Mycolicibacterium smegmatis</i><br>(strain ATCC 700084 / mc <sup>2</sup> ) | PF00135         | Carboxylic ester hydrolase                          | ABK75119.1                |

|                |                                                                               |         |                                                     |                           |
|----------------|-------------------------------------------------------------------------------|---------|-----------------------------------------------------|---------------------------|
| A0QS51         | <i>Mycolicibacterium smegmatis</i><br>(strain ATCC 700084 / mc <sup>2</sup> ) | PF00561 | Hydrolase  alpha/beta fold family protein           | ABK71811.1                |
| A0QRG4         | <i>Mycolicibacterium smegmatis</i><br>(strain ATCC 700084 / mc <sup>2</sup> ) | PF12697 | Hydrolase  alpha/beta fold family protein           | ABK75828.1                |
| A0QQ34         | <i>Mycolicibacterium smegmatis</i><br>(strain ATCC 700084 / mc <sup>2</sup> ) | PF00135 | Carboxylic ester hydrolase                          | ABK75576.1                |
| A0QPN5         | <i>Mycolicibacterium smegmatis</i><br>(strain ATCC 700084 / mc <sup>2</sup> ) | PF12697 | Alpha/beta hydrolase fold                           | ABK74583.1 WP_011726959.1 |
| A0QNW0         | <i>Mycolicibacterium smegmatis</i><br>(strain ATCC 700084 / mc <sup>2</sup> ) | PF06441 | Epoxide hydrolase 1                                 | ABK72822.1                |
| A0A2U9Q<br>0T8 | <i>Mycolicibacterium smegmatis</i><br>(strain MKD8)                           | PF06441 | Epoxide hydrolase 1                                 | WP_003898281.1            |
| A0A2U9P<br>XN4 | <i>Mycolicibacterium smegmatis</i><br>(strain MKD8)                           | PF06441 | Epoxide hydrolase                                   | WP_003897072.1            |
| A0A2U9P<br>RT3 | <i>Mycolicibacterium smegmatis</i><br>(strain MKD8)                           | PF00561 | Hydrolase  alpha/beta hydrolase fold family protein | WP_003894961.1            |
| A0A2U9P<br>L24 | <i>Mycolicibacterium smegmatis</i><br>(strain MKD8)                           | PF00561 | Hydrolase  alpha/beta fold family protein           | WP_003892740.1            |

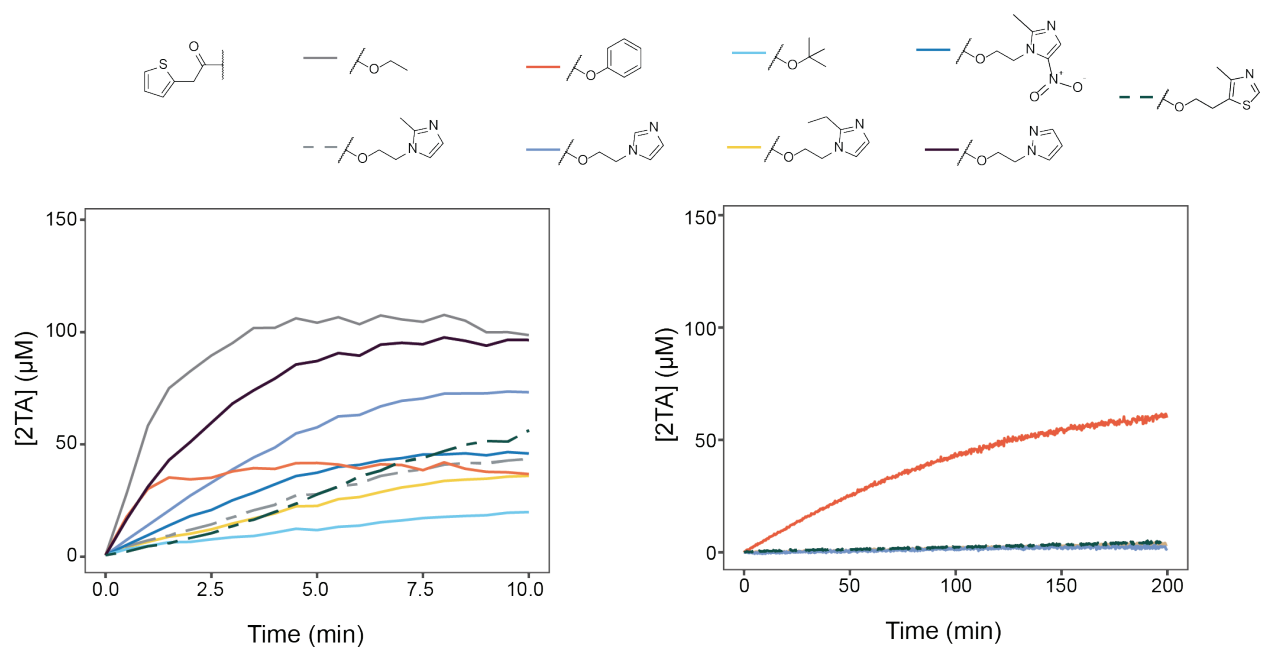

**Figure S1.** Graphs showing esterase activity of lysates from *M. smegmatis* mc<sup>2</sup>155 and *E. coli* DH10B cells. Although all esters were cleaved to some degree in the *M. smegmatis* lysate, only the phenol ester was hydrolyzed in the *E. coli* cell lysate. Note: Only the ethyl, imidazole, sulfurol, and phenol esters were tested in *E. coli*.

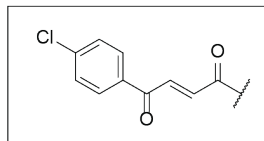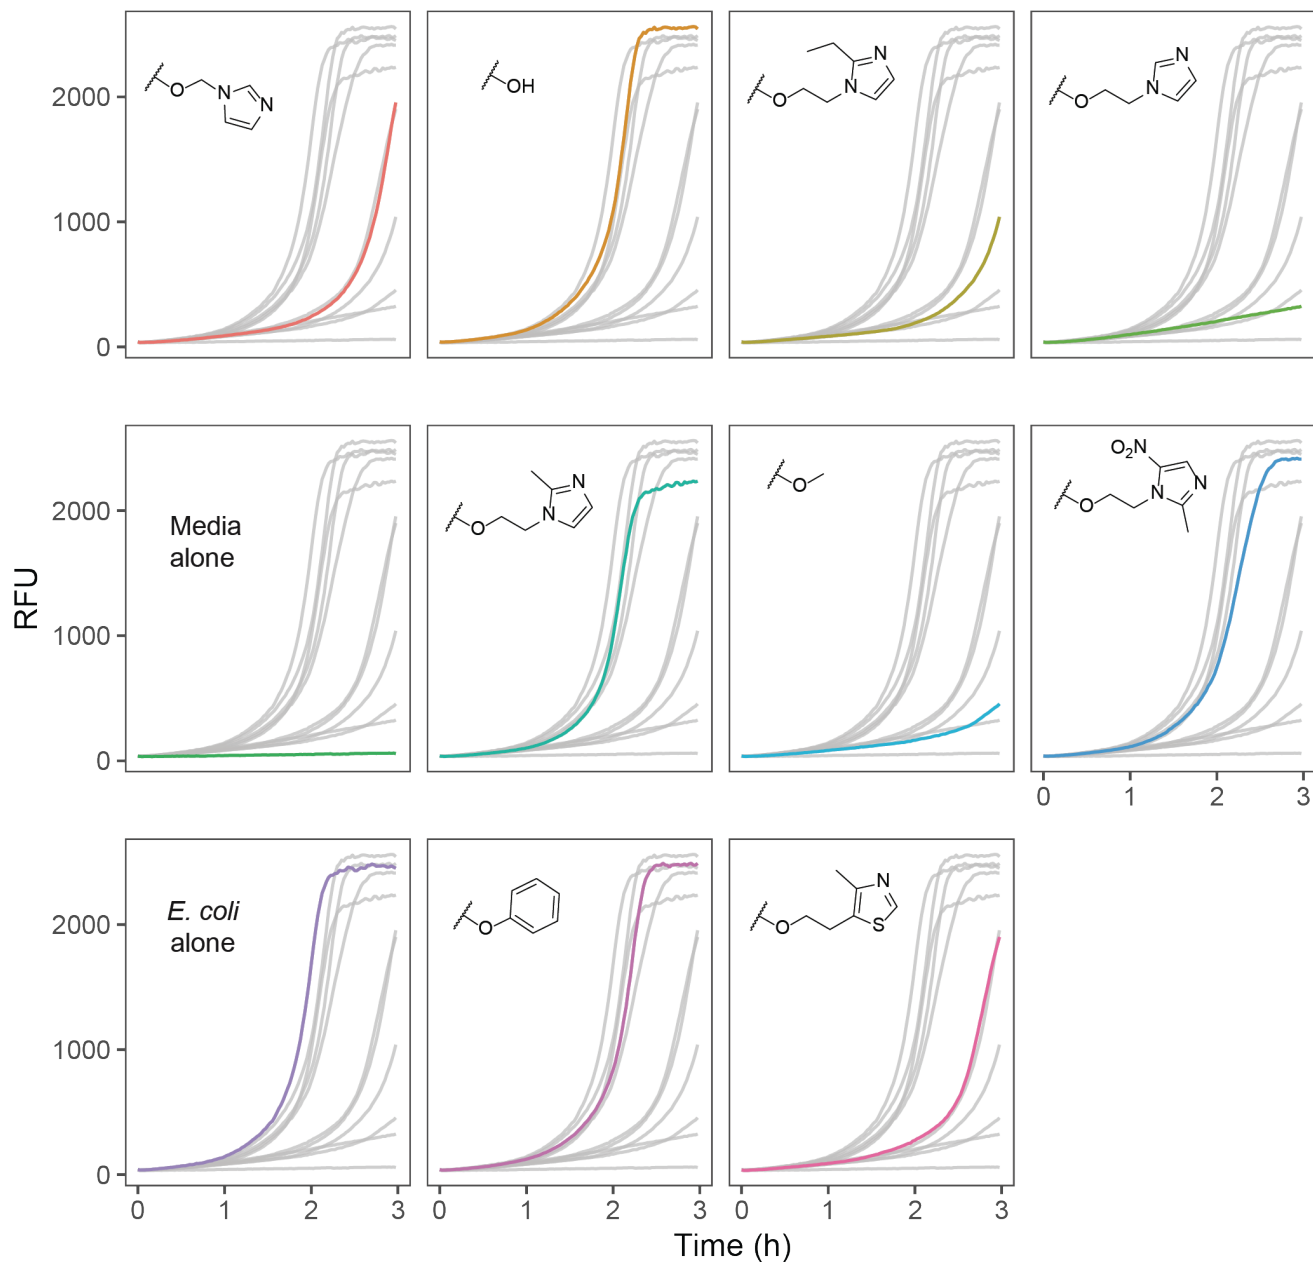

**Figure S2.** Graphs showing a screen of the antibacterial activity of esters of *trans*-3-(4-chlorobenzoyl)acrylic acid against *E. coli* DH10B cells. Compounds were at a concentration of 50  $\mu$ M. Lines represent the average of triplicate or duplicate preparations. Colored lines represent the compound drawn in the inset; gray lines represent the other compounds.

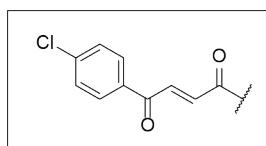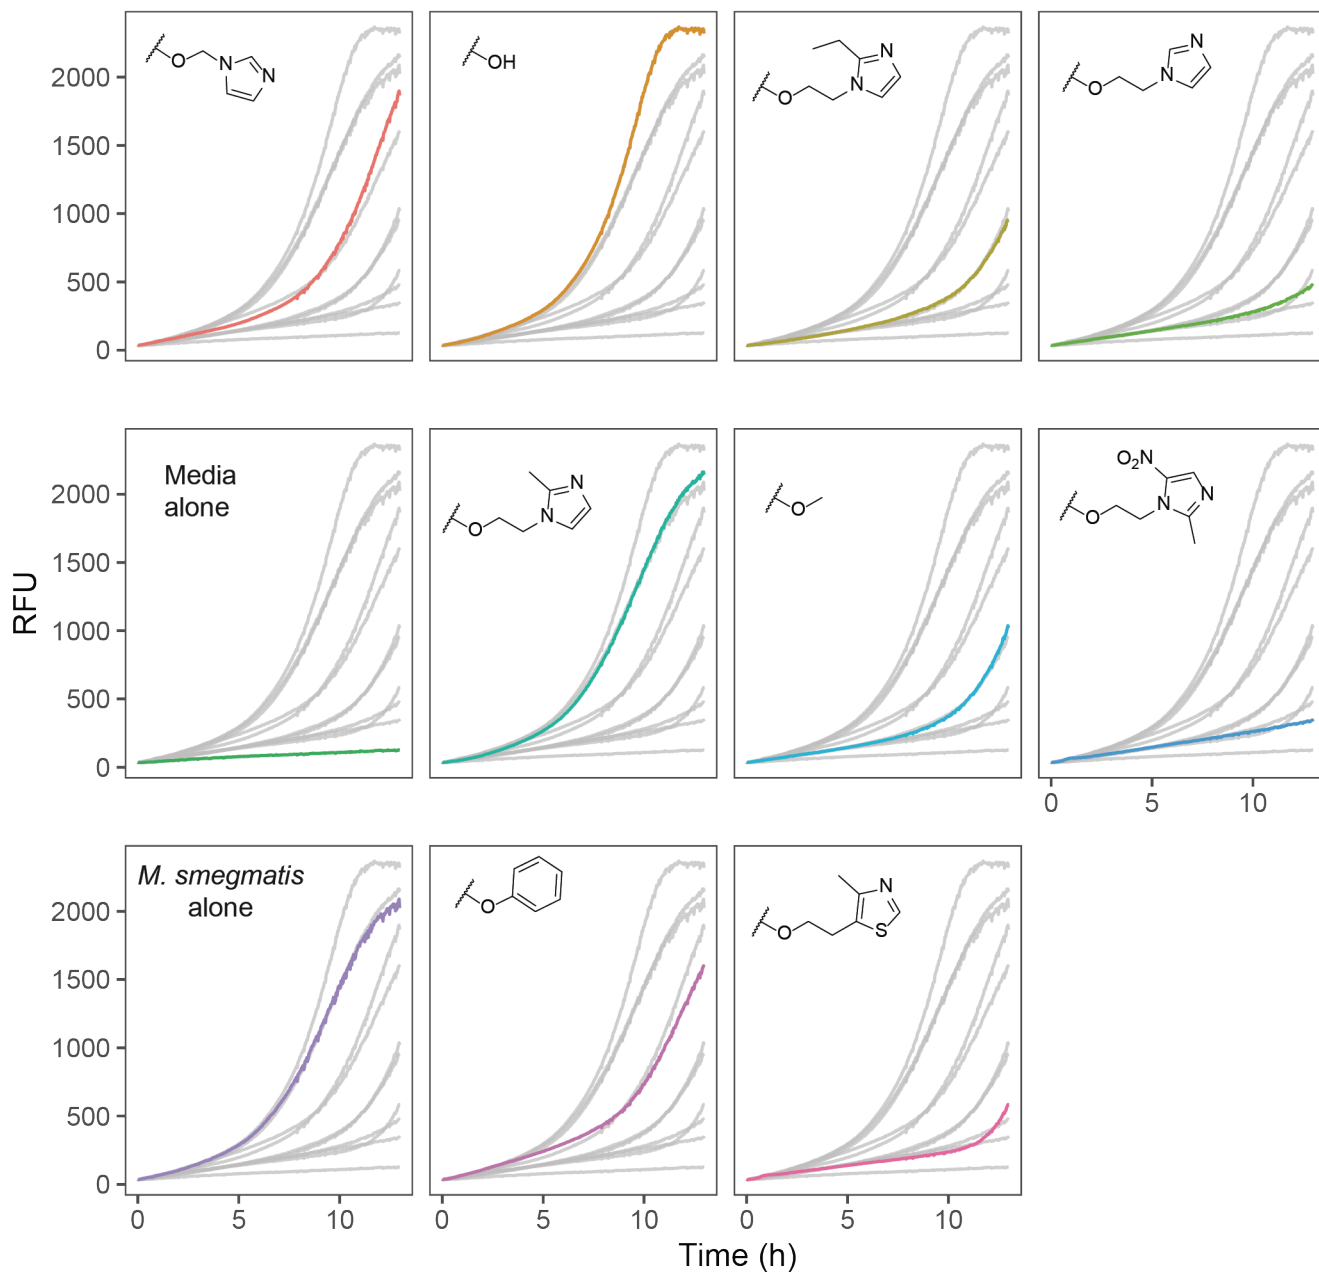

**Figure S3.** Graphs showing a screen of the antibacterial activity of esters of *trans*-3-(4-chlorobenzoyl)acrylic acid against *M. smegmatis* mc<sup>2</sup>155 cells. Compounds were at a concentration of 50  $\mu$ M. Lines represent the average of triplicate or duplicate preparations. Colored lines represent the compound drawn in the inset; gray lines represent the other compounds.

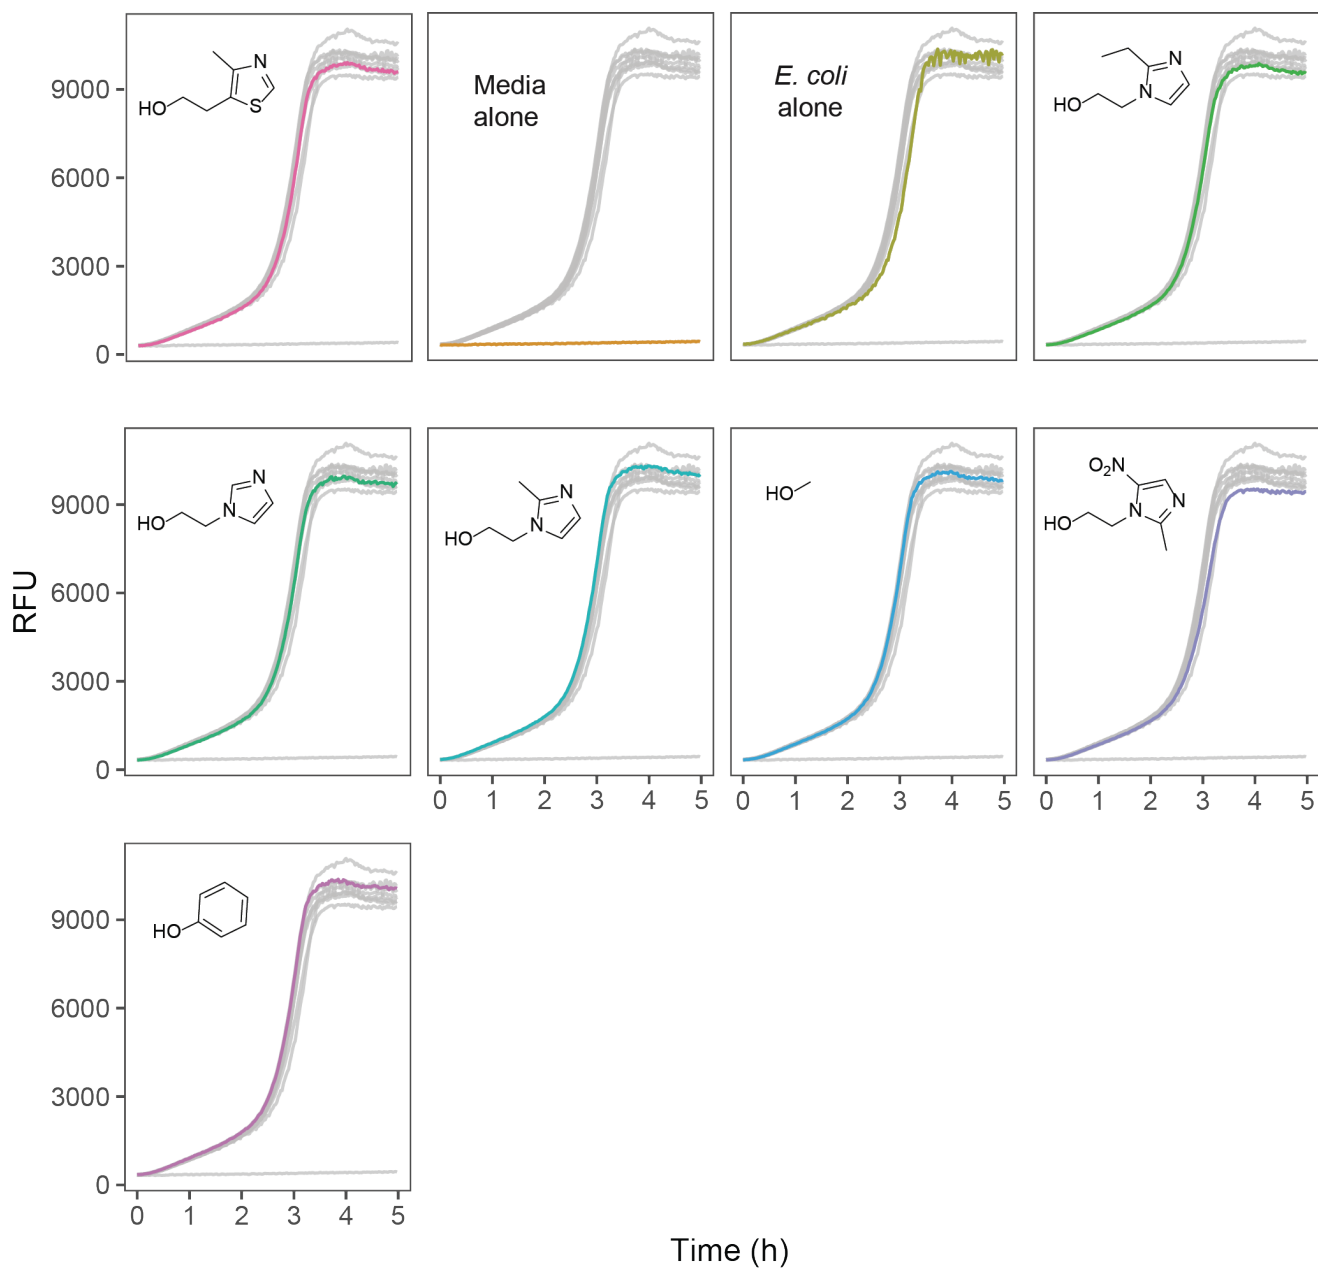

**Figure S4.** Graphs showing a screen of the antibacterial activity of alcohols against *E. coli* DH10B cells. Compounds were at a concentration of 100  $\mu$ M. Lines represent the average from triplicate preparations. Colored lines represent the compound drawn in the inset; gray lines represent the other compounds.



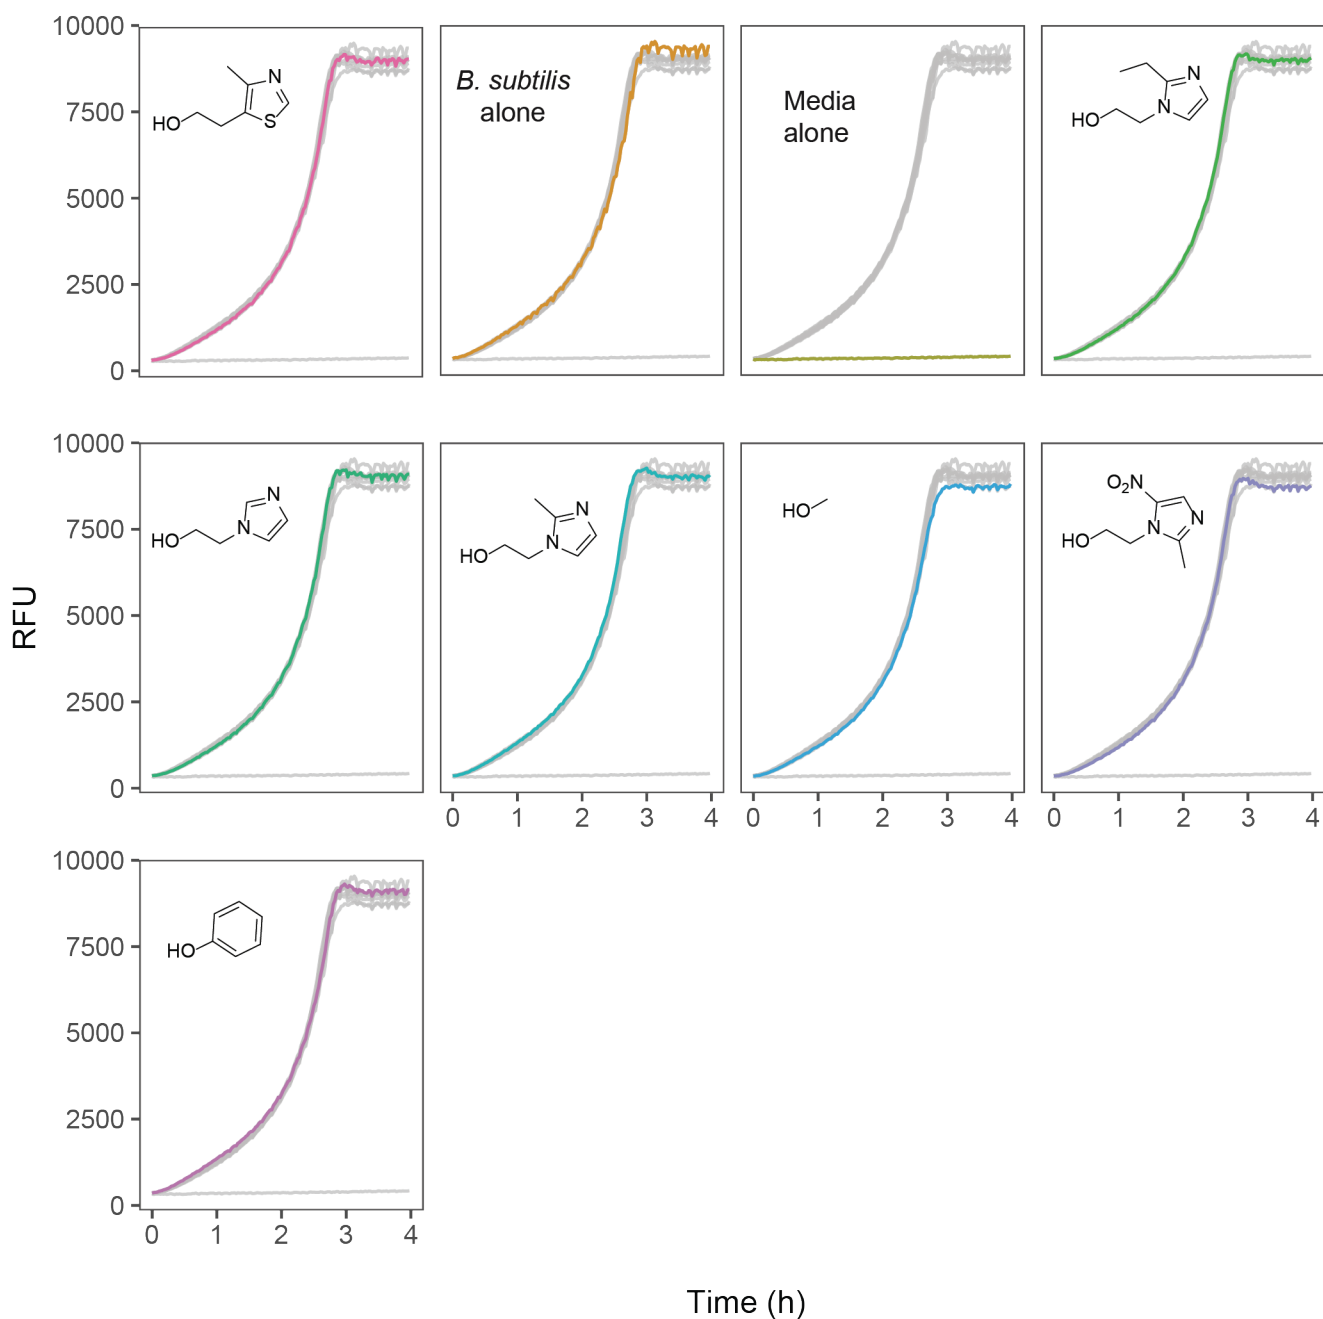

**Figure S5.** Graphs showing a screen of the antibacterial activity of alcohols against *B. subtilis* OI1085 cells. Compounds were at a concentration of 100  $\mu\text{M}$ . Lines represent average of triplicate preparations, with the exception of those for phenol and 2-(2-methyl-1H-imidazol-1-yl)ethan-1-ol, which were tested in duplicate. Colored lines represent the compound drawn in the inset; gray lines represent the other compounds.

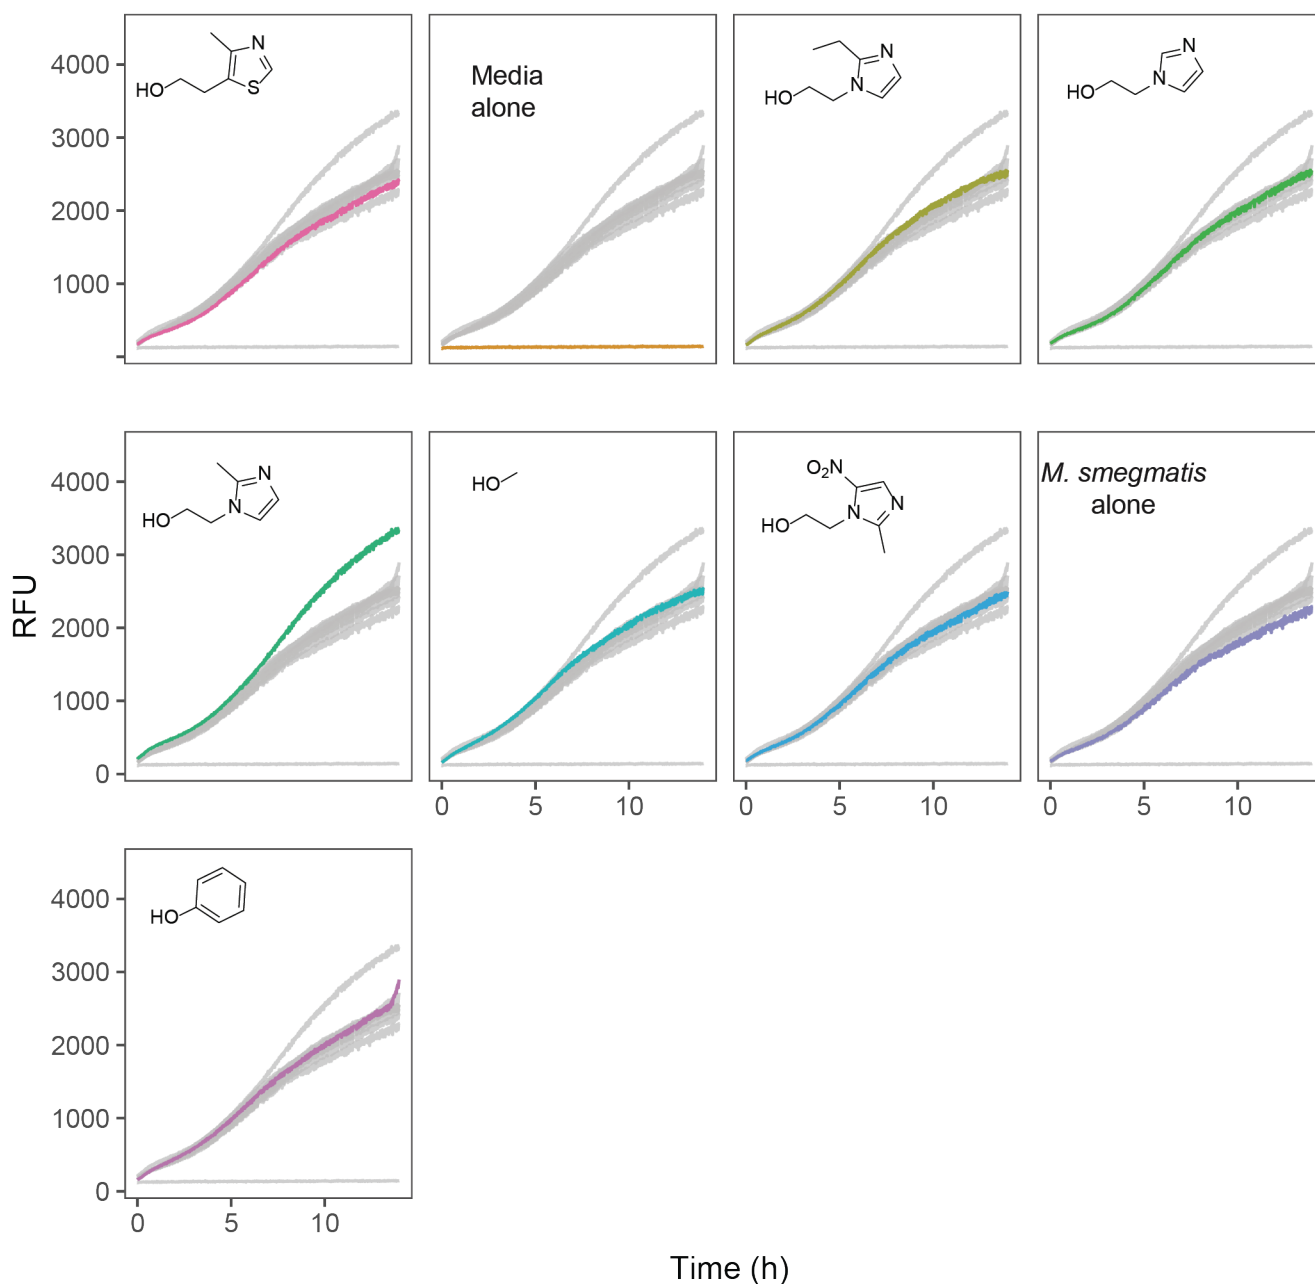

**Figure S6.** Graphs showing a screen of the antibacterial activity of alcohols against *M. smegmatis* mc<sup>2</sup>155 cells. Compounds were at a concentration of 100  $\mu$ M. Lines represent average of triplicate preparations. Colored lines represent the compound drawn in the inset; gray lines represent the other compounds.

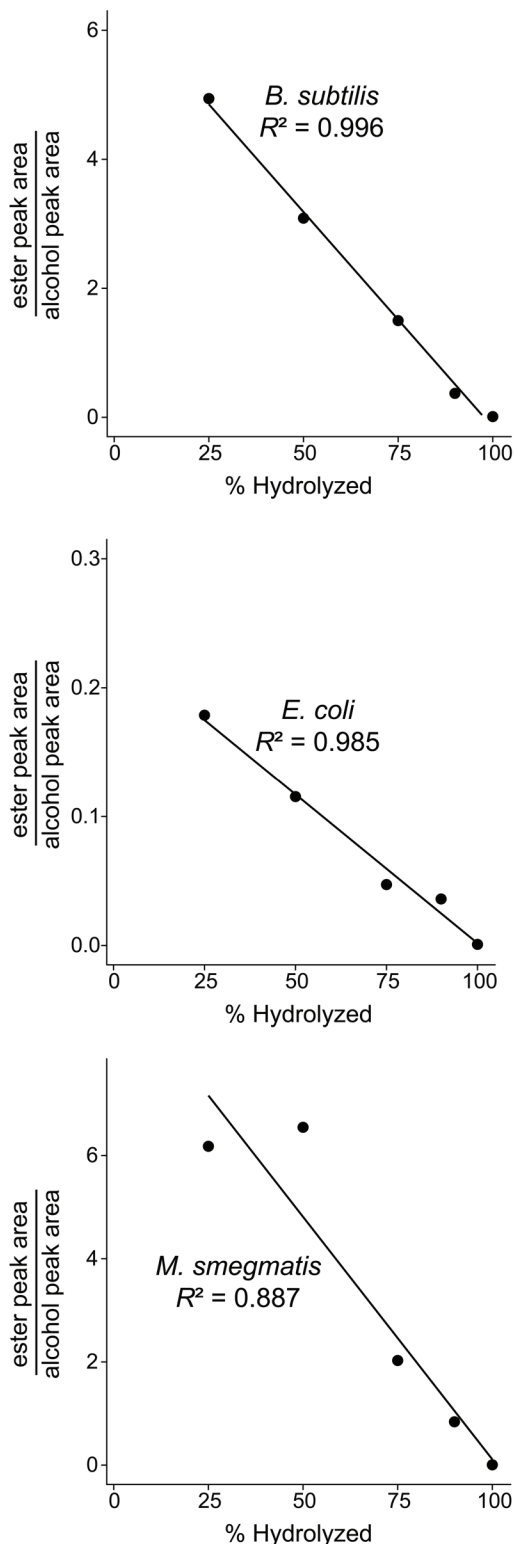

**Figure S7.** Calibration of sulfurol ester:sulfurol peak-area ratio versus % hydrolyzed. Curves were used to determine the extent of hydrolysis in incubated samples of the sulfurol ester in cell lysate of the corresponding bacteria. Note: At <25% hydrolysis, the relationship was no longer linear.

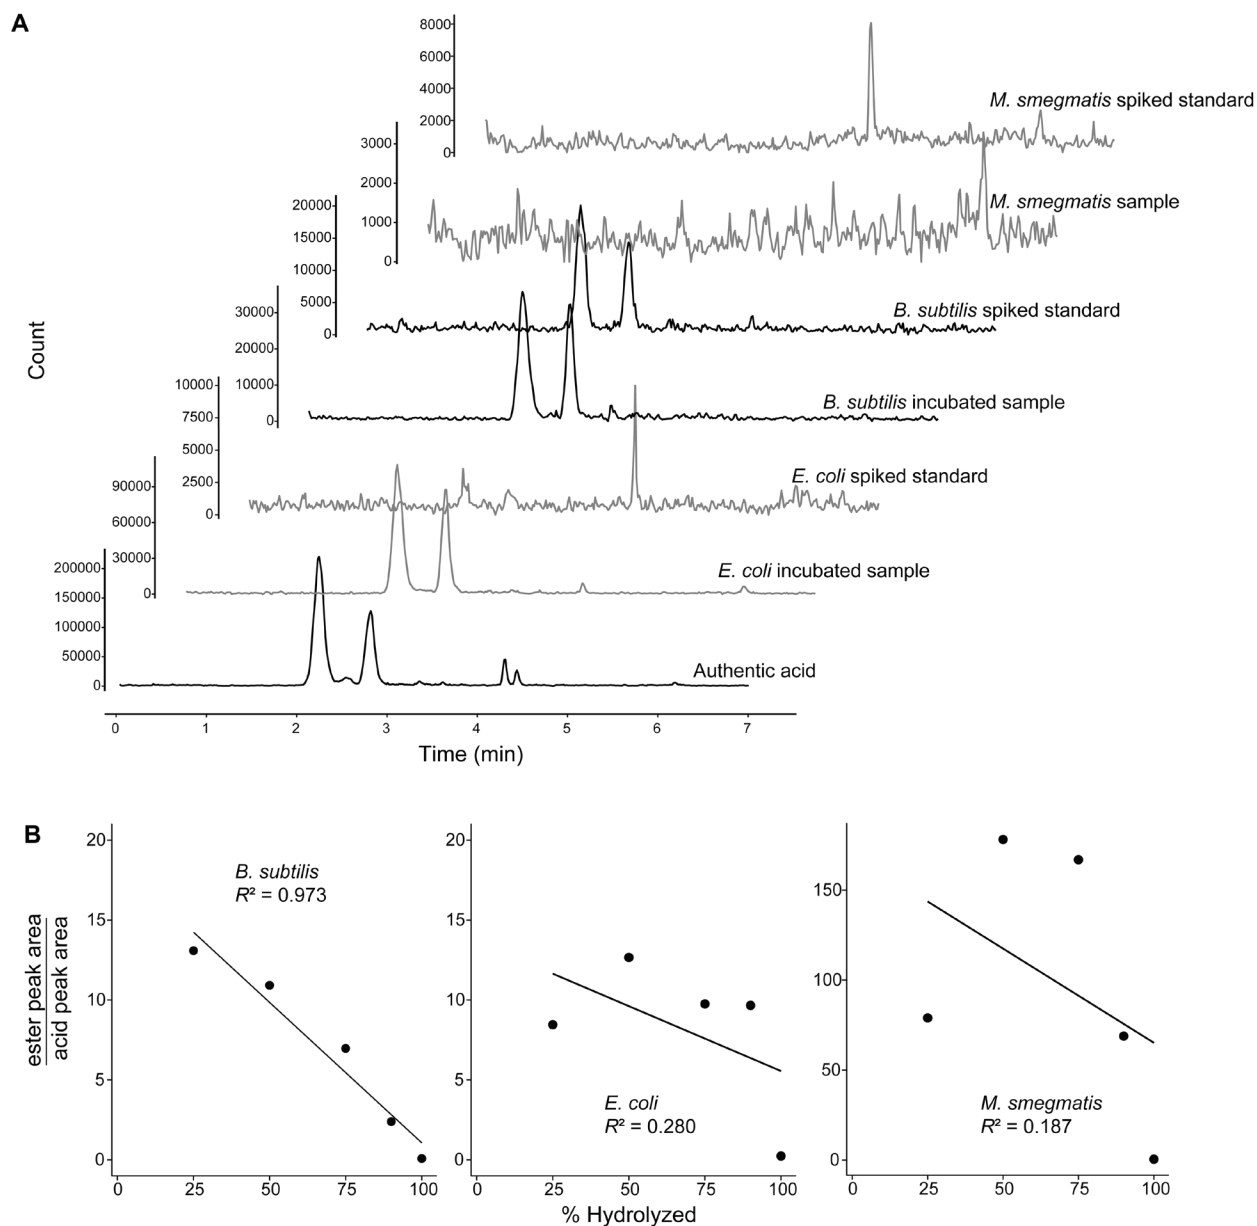

**Figure S8.** LC–MS spectra and calibration curves of *trans*-3-(4-chlorobenzoyl)acrylic acid demonstrating its unsuitability for semiquantitative determination of ester hydrolysis. (A) The traces labeled “spiked standard” were prepared at 200  $\mu$ M in the indicated bacterial lysate and immediately extracted with dichloromethane and prepared for injection as described above. The traces labeled “incubated sample” were samples that were incubated with 200  $\mu$ M of the sulfurol ester, held at 37° C for 2 h, and finally extracted with dichloromethane and injected as described above. (B) Calibration curves showing the correlation or lack of correlation of the sulfurol ester:acid peak area ratio as a function of the % hydrolyzed. Whereas the *B. subtilis* standard and sample injections show good correspondence between the major peaks in both the sample and standard chromatograms as well as a strong correlation, *E. coli* and *M. smegmatis* show little correspondence between the major peaks in the sample and standard and weak correlation between the area ratio and % hydrolyzed.

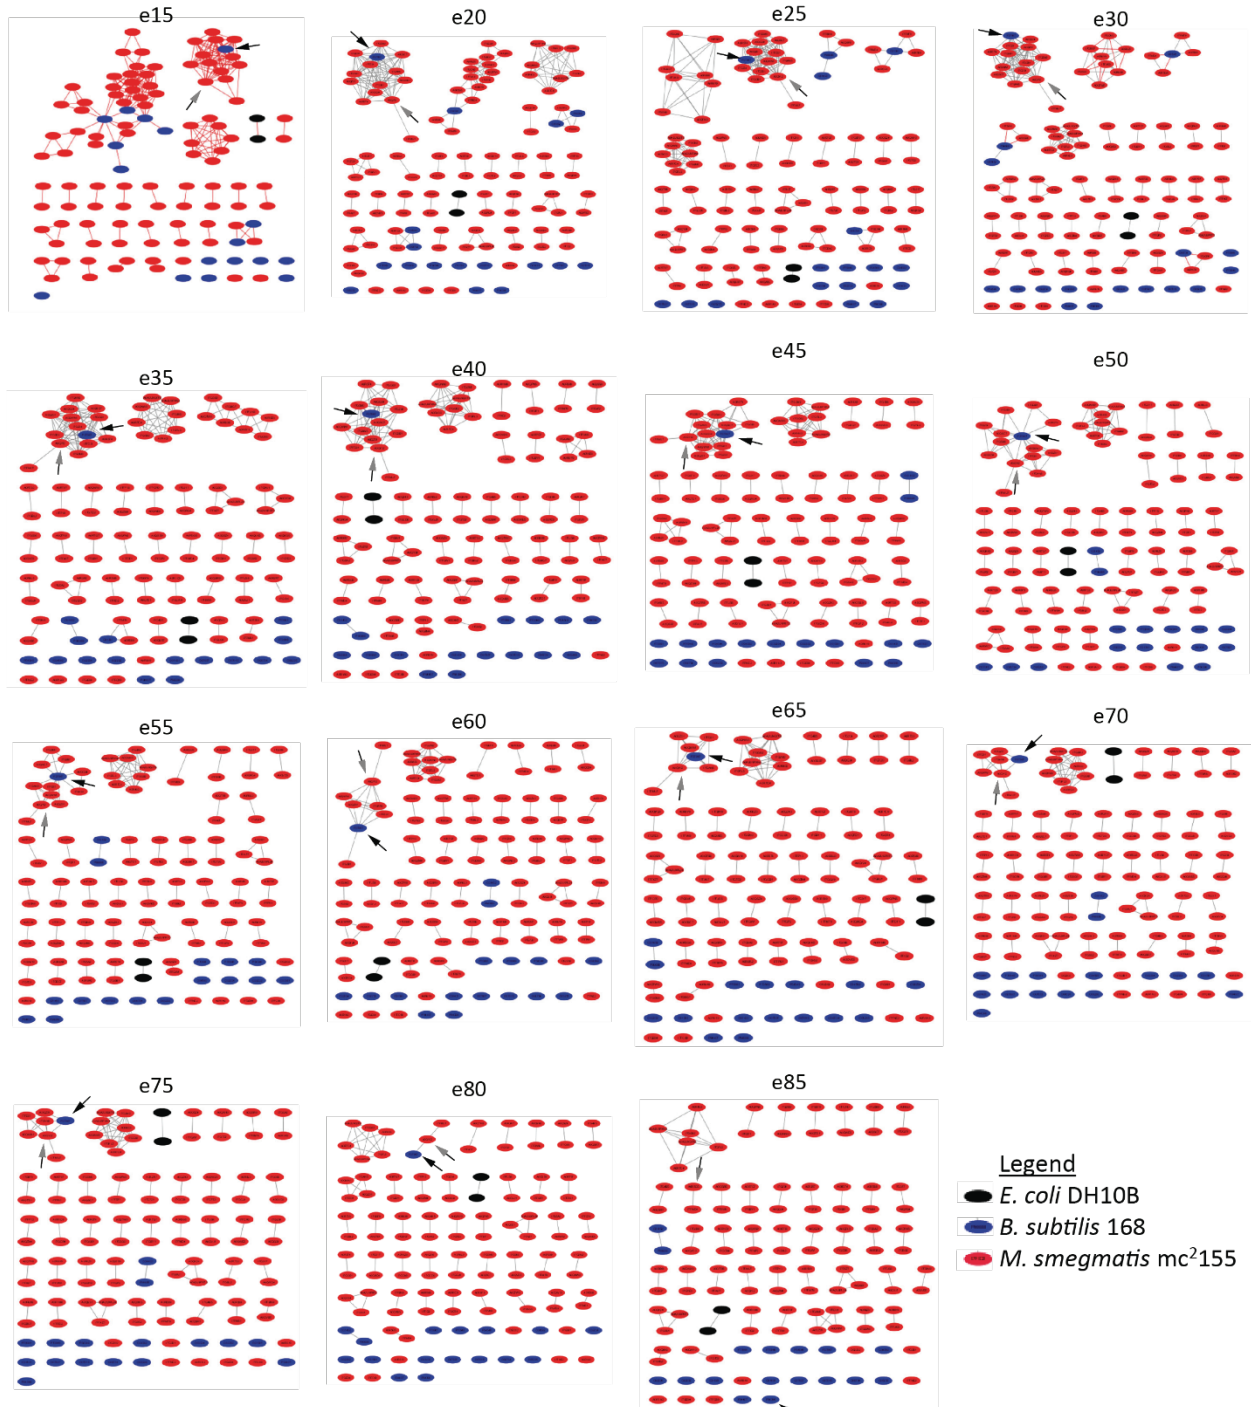

**Figure S9.** Determination of the E-value threshold for SSN. Black arrows indicate esterase pnbA from *B. subtilis*; gray arrows indicate esterase A0QIY2 from *M. smegmatis*. The cluster containing both of these esterases persists from E-values ranging from 15–80. A final threshold value of 37 was chosen because this value was just above the value at which multiple clusters containing esterases from both *M. smegmatis* and *B. subtilis* were found.

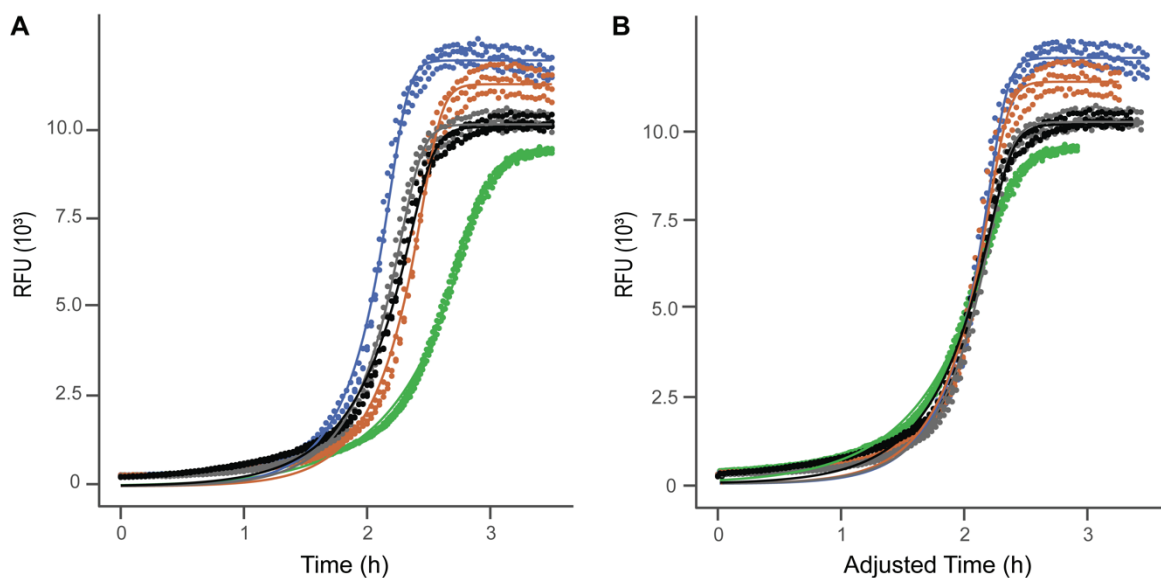

**Figure S10.** Viability curves of *E. coli* DH10B cells with empty pet-22b(+) and pSC6 (blue and gray) *E. coli* DH10B with pET22b-pnbA and pSC6 (sienna), *E. coli* DH10B cells with pET22b-MSmegEsterase and pSC6 (black), and *E. coli* DH10B (green). (A) Viability curves versus unadjusted time. Fits to Richards curve are also illustrated. (B) Viability curves and fits plotted after adjusting the time to have an identical inflection point.

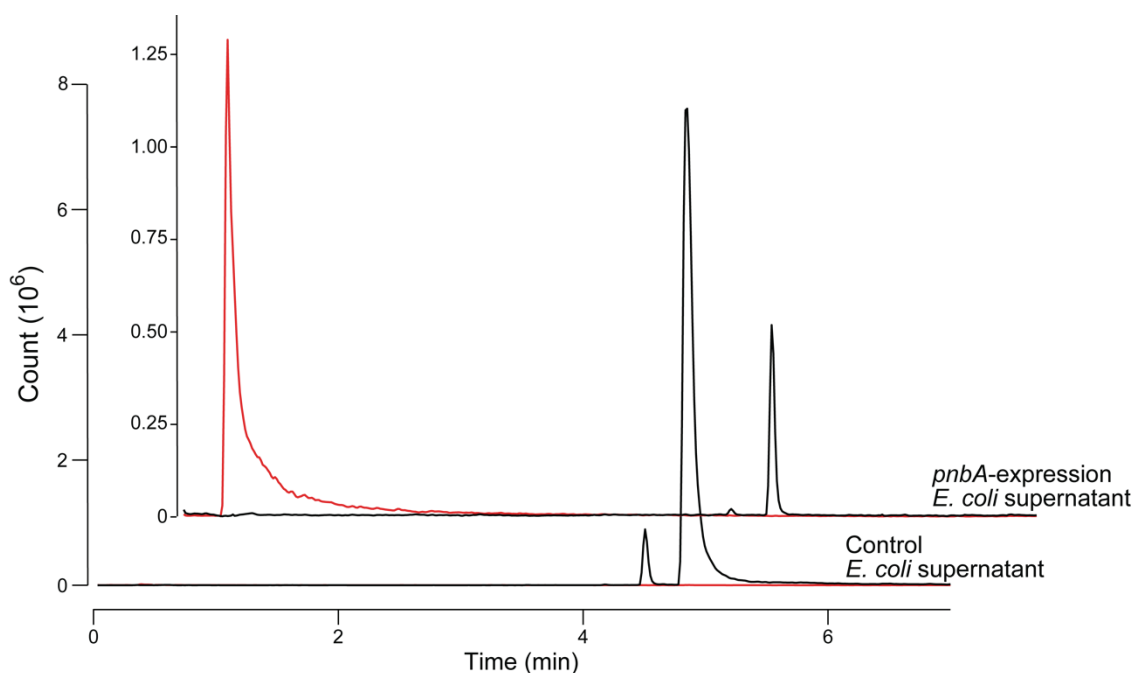

**Figure S11.** Extracted ion chromatograms of sulfurol ester **3** mixed with various spent culture supernatants. EICs of  $m/z = 144$  (corresponding to sulfurol) are in red; EICs of  $m/z = 336$  (corresponding to sulfurol ester **3**) are in black. Sulfurol is observed only in the supernatant of *pnbA*-expressing *E. coli*, suggesting that *pnbA* carboxylesterase is present in the cell culture supernatant.

Methyl (*E*)-4-(4-Chlorophenyl)-4-oxobut-2-enoate (**2**)

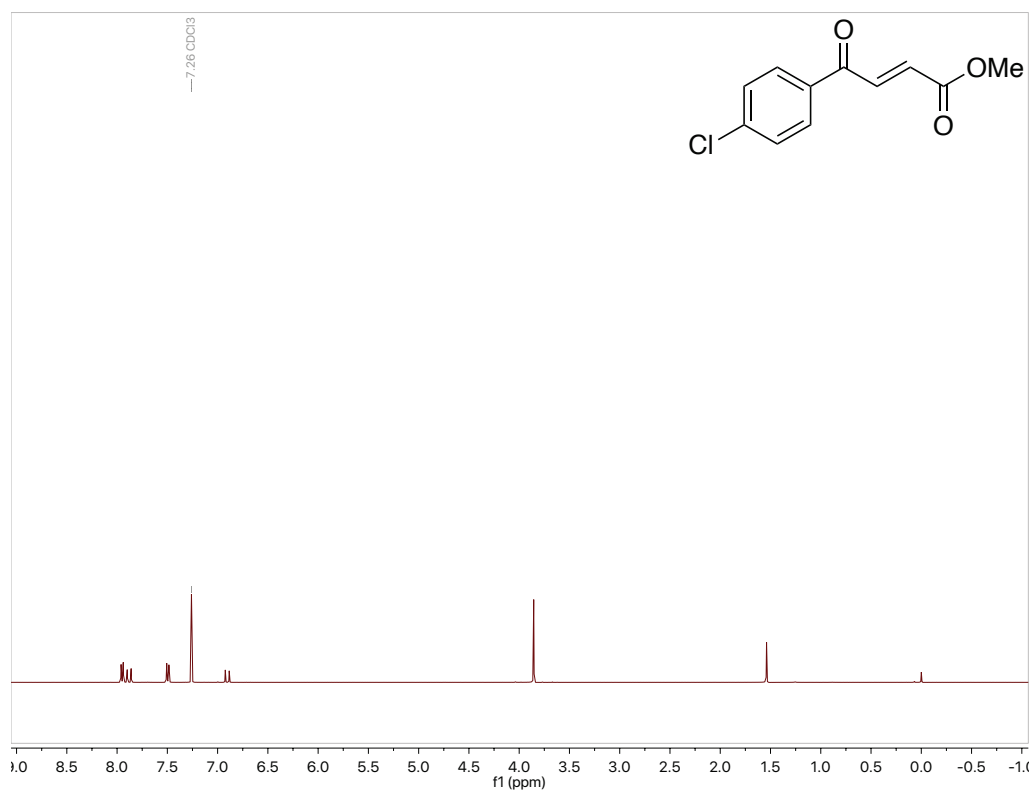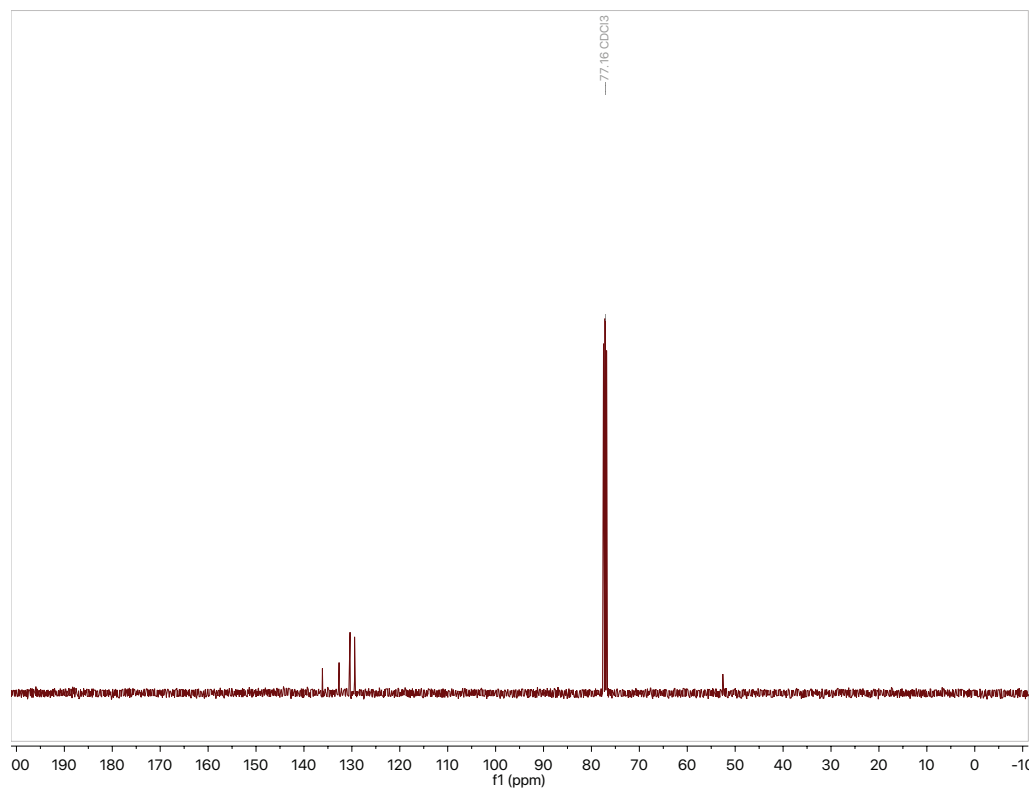

Methyl 4-(4-Chlorophenyl)-2-methoxy-4-oxobutanoate (S1)

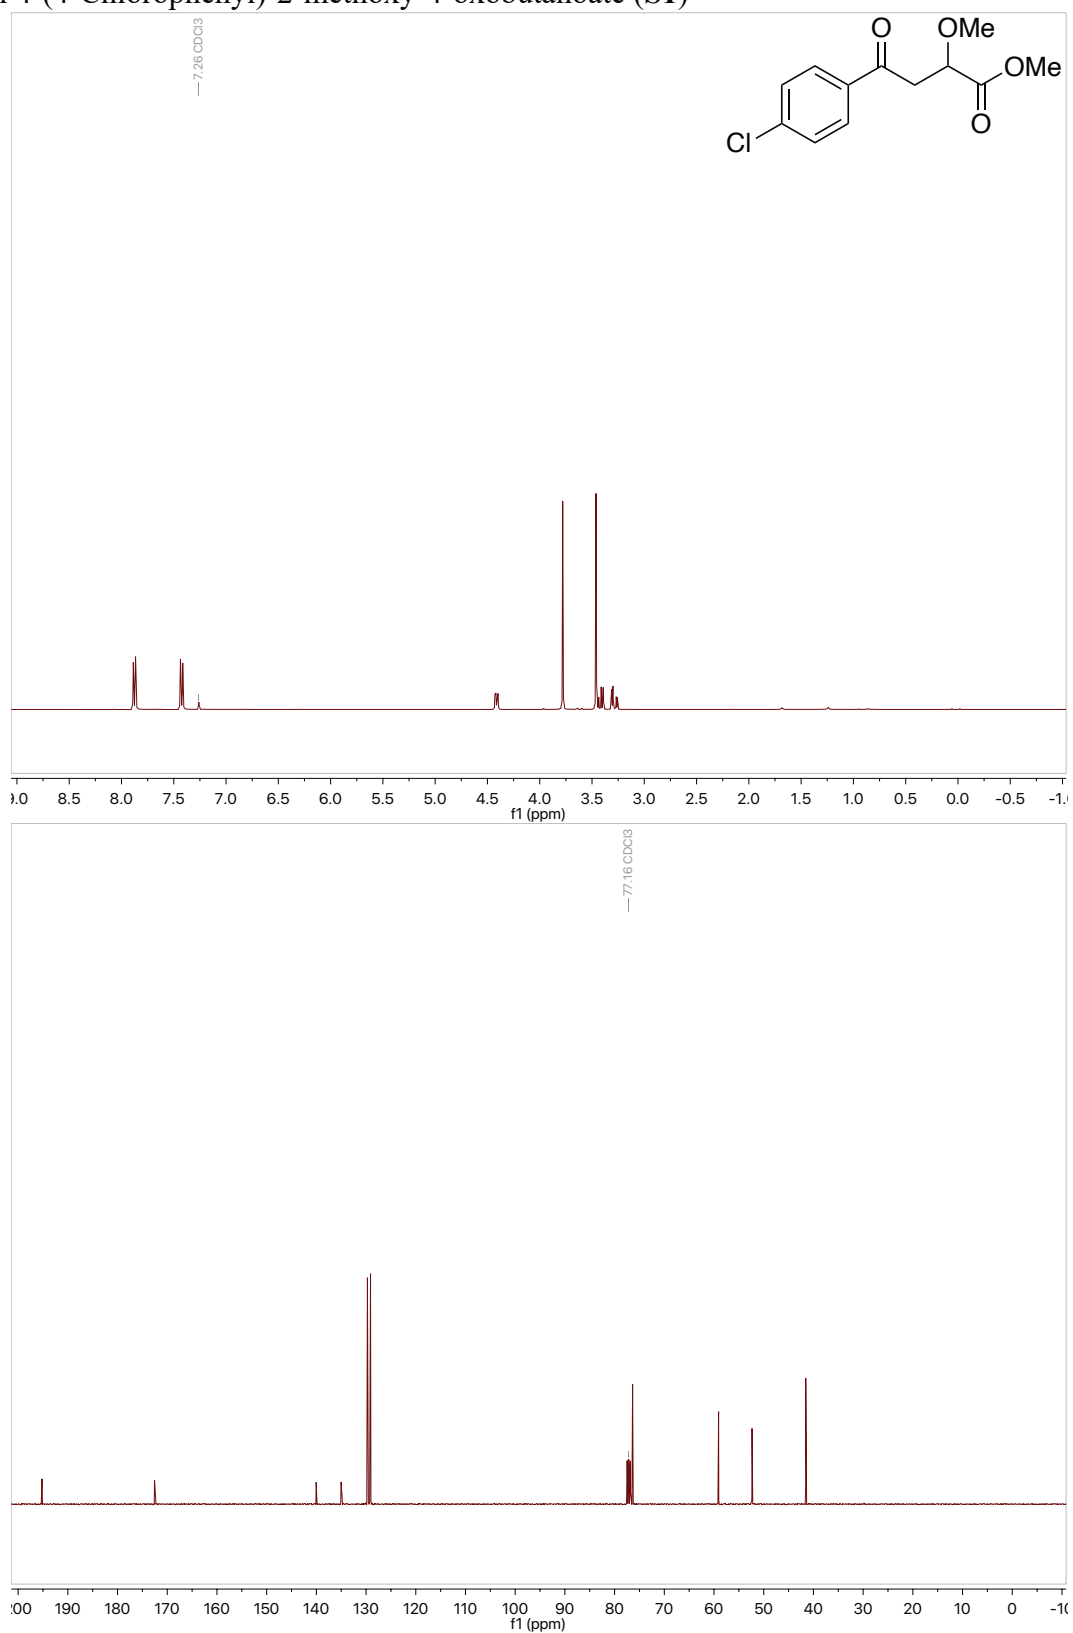



2-(4-Methylthiazol-5-yl)ethyl (*E*)-4-(4-Chlorophenyl)-4-oxobut-2-enoate (**3**)

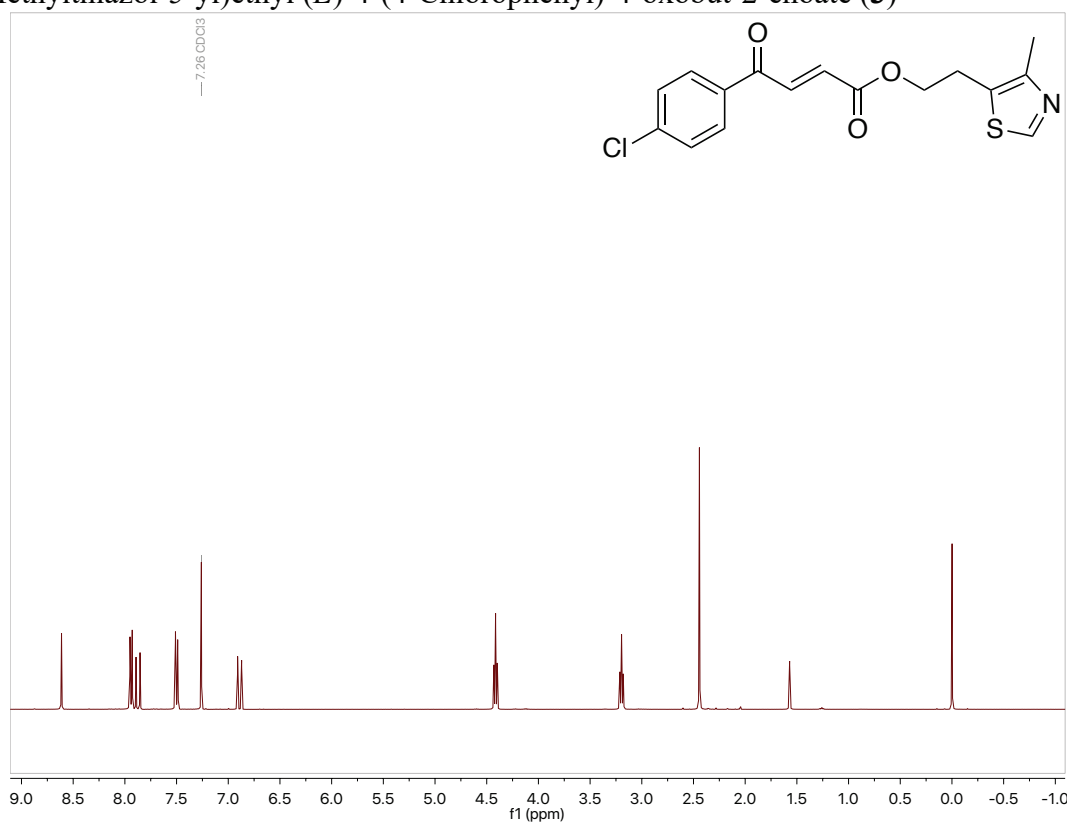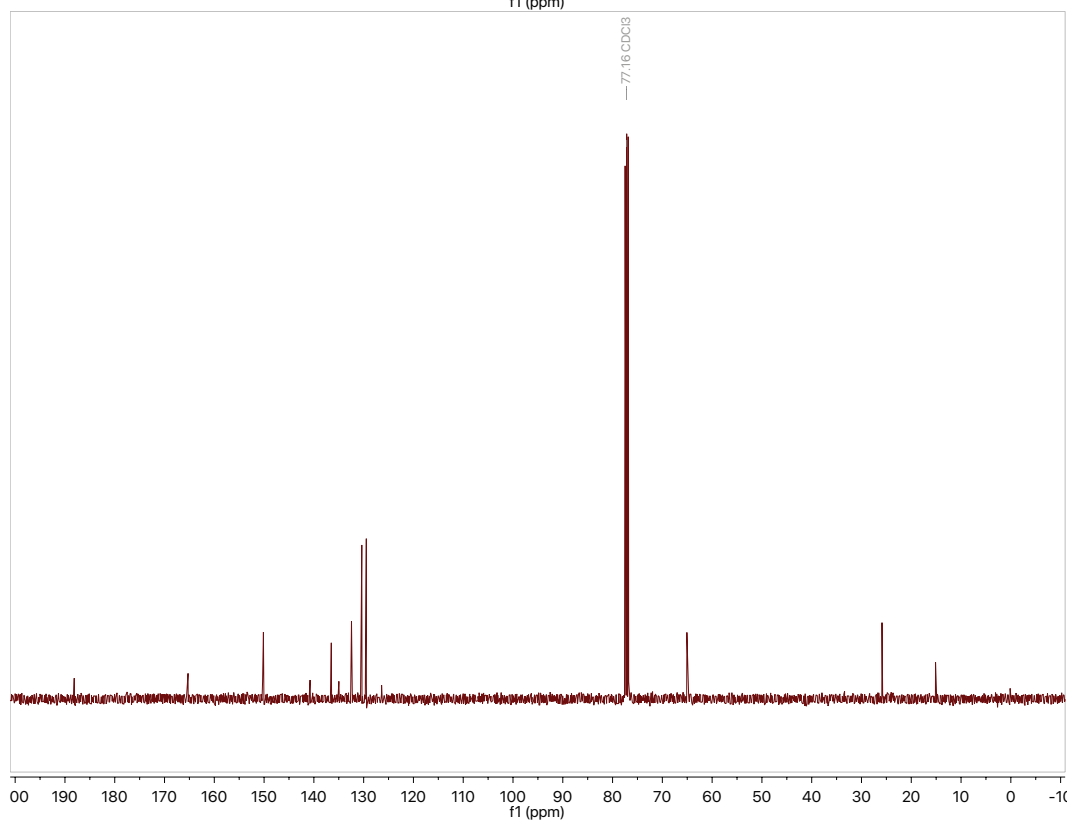

2-(2-Methyl-5-nitro-1*H*-imidazol-1-yl)ethyl (*E*)-4-(4-Chlorophenyl)-4-oxobut-2-enoate (**4**)

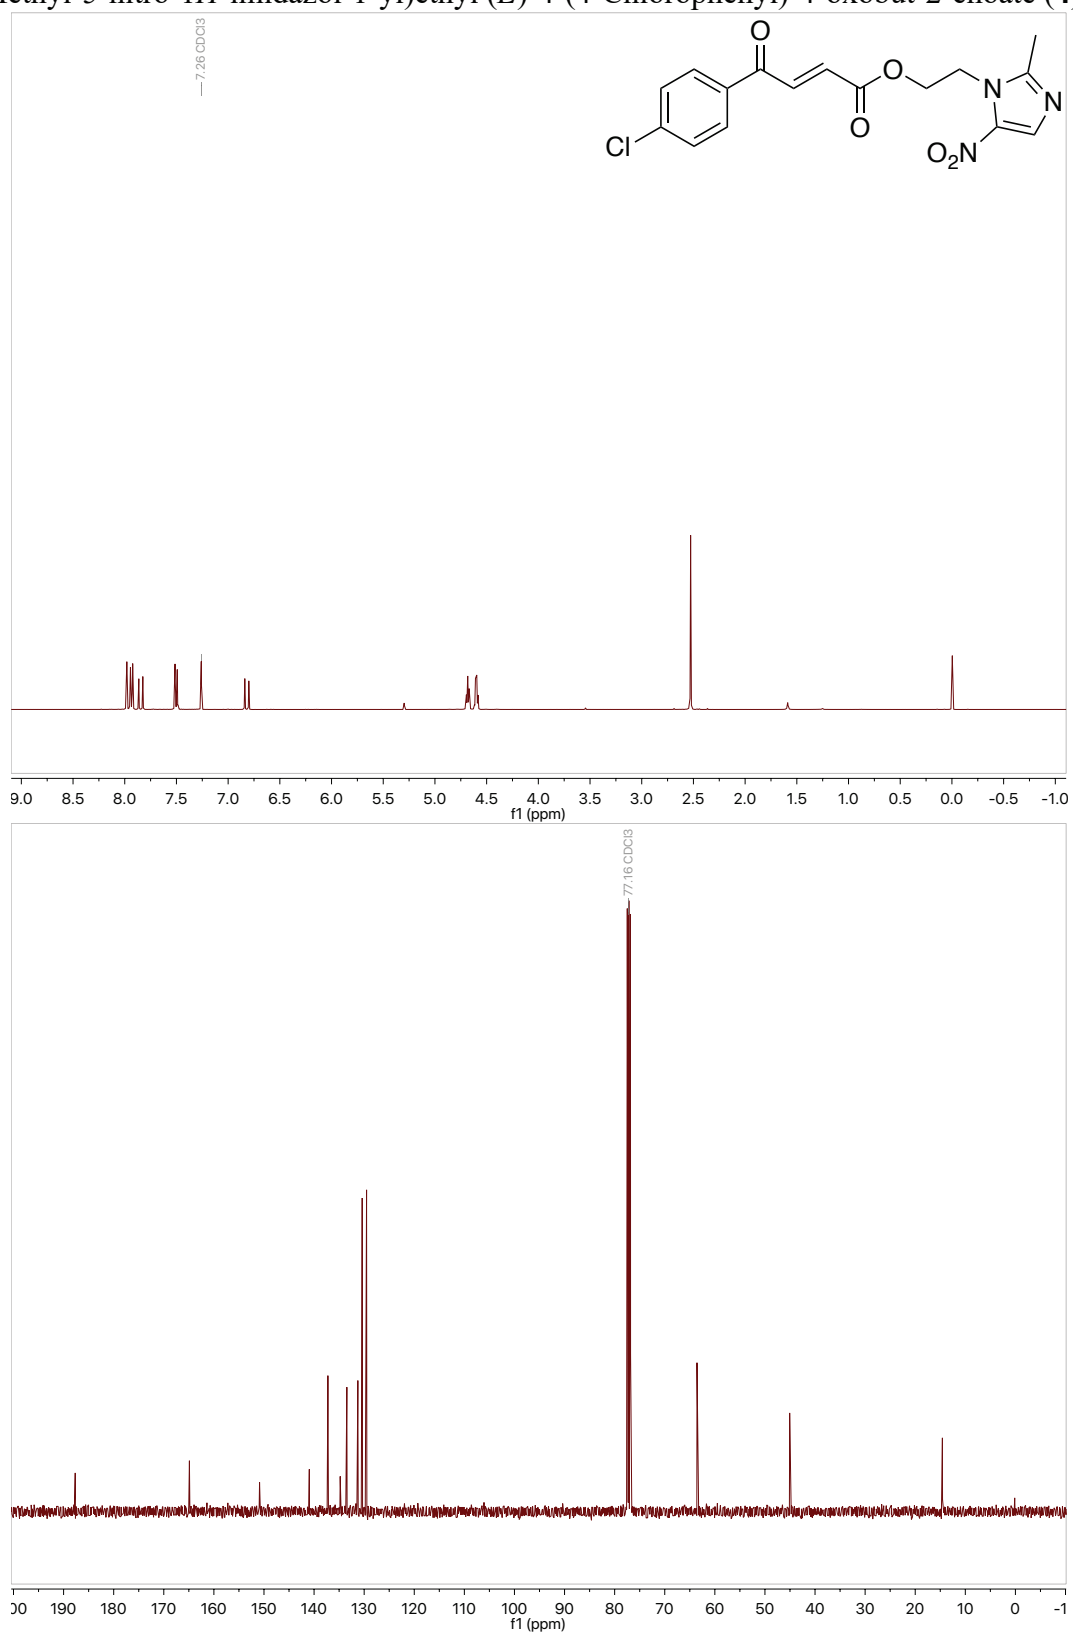

Phenyl (*E*)-4-(4-Chlorophenyl)-4-oxobut-2-enoate (**5**)

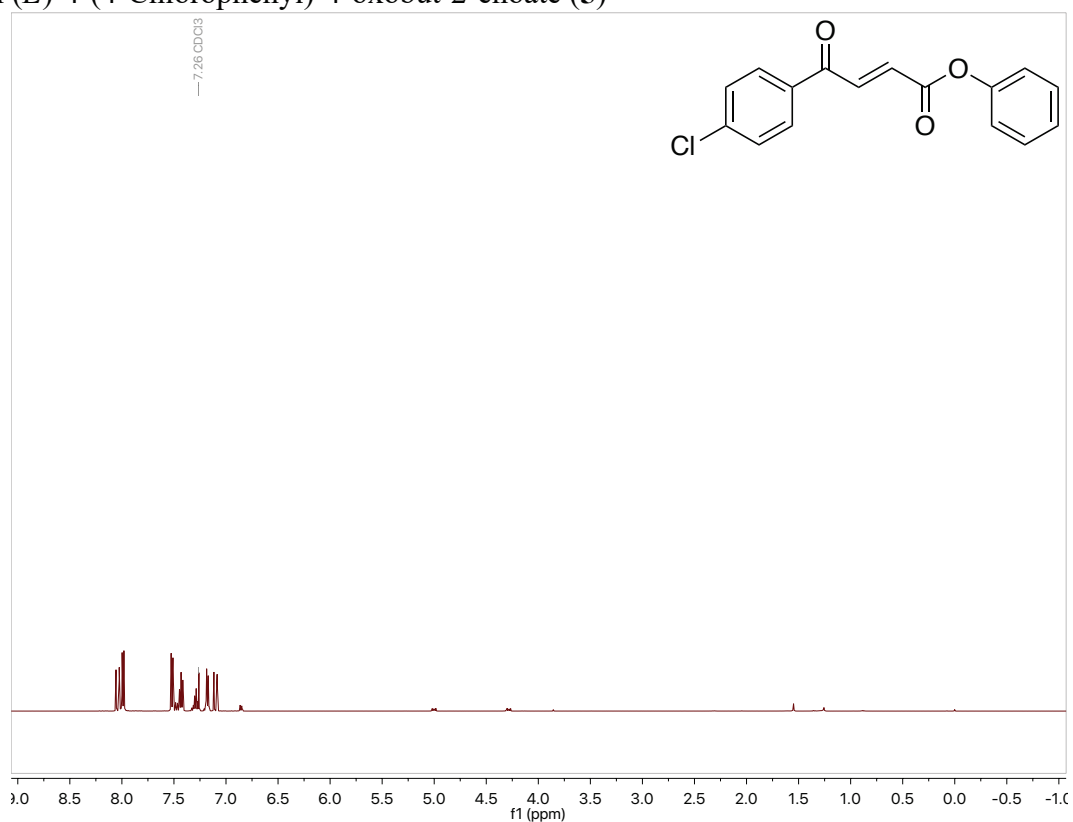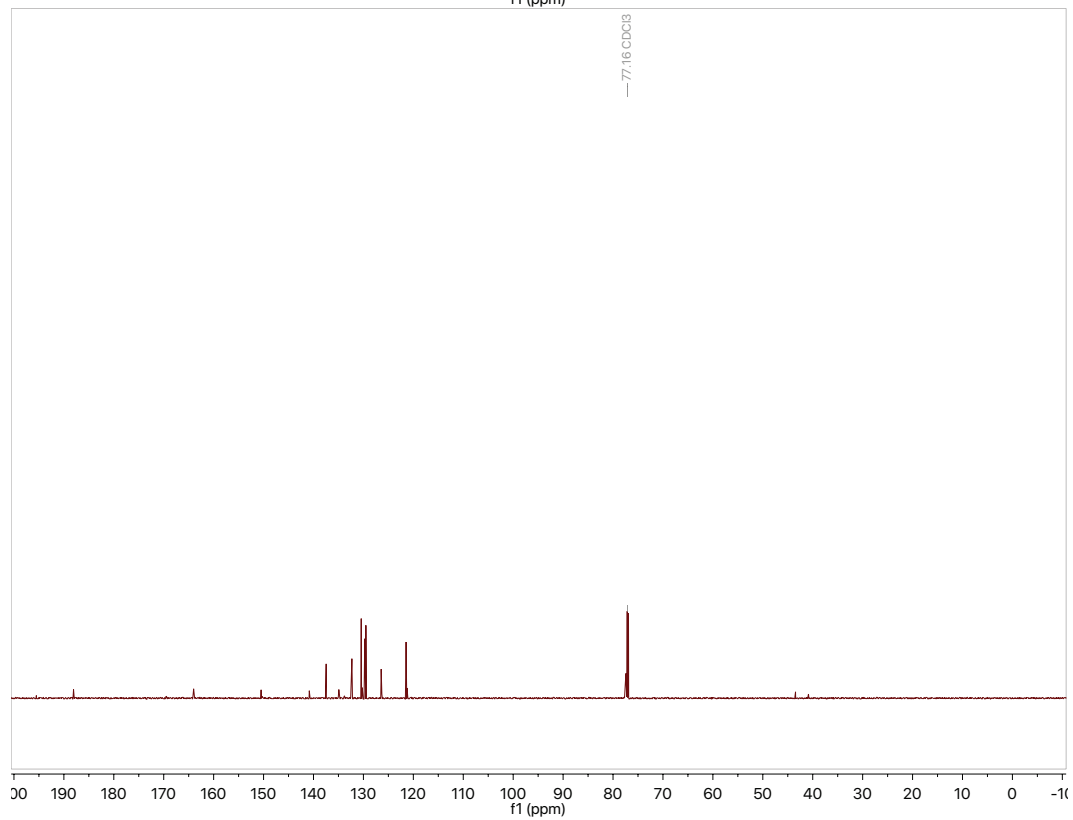

(1*H*-Imidazol-1-yl)methyl (*E*)-4-(4-Chlorophenyl)-4-oxobut-2-enoate (**6**)

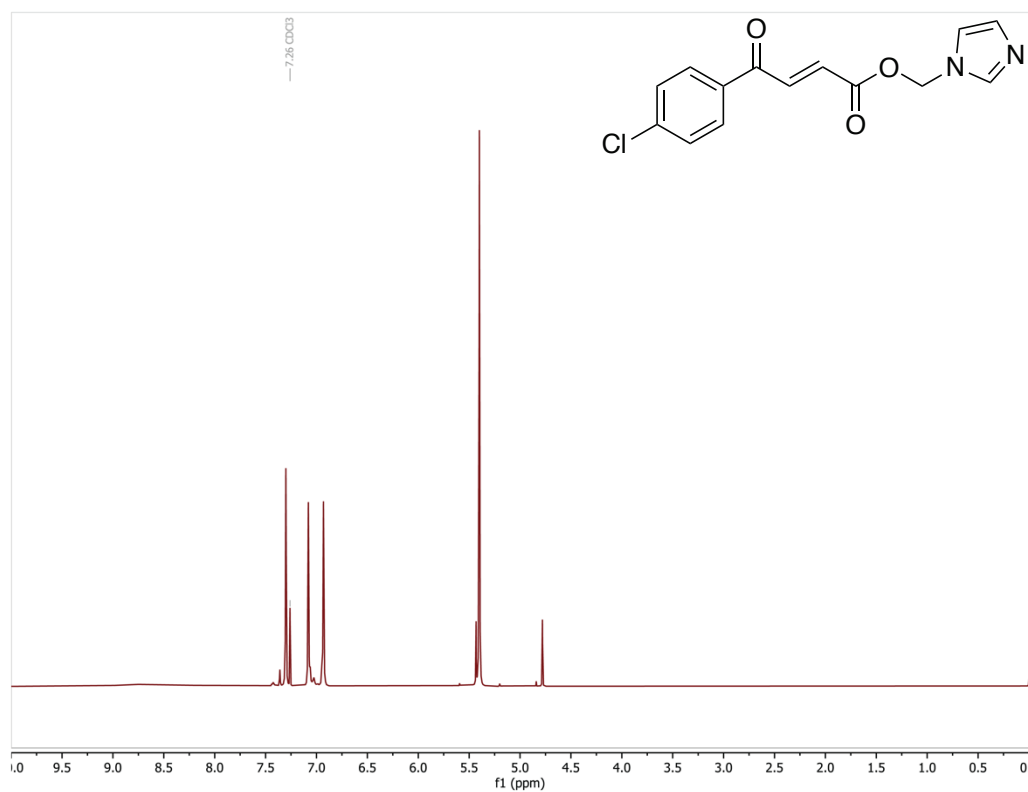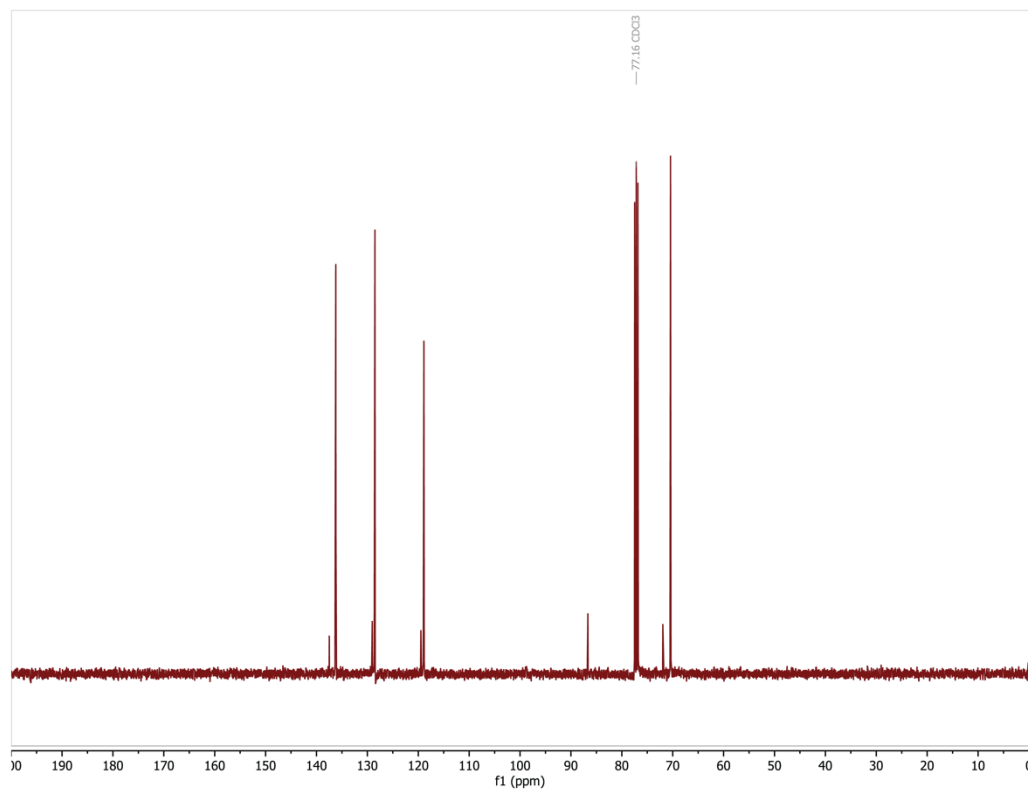

2-(1*H*-Imidazol-1-yl)ethyl (*E*)-4-(4-Chlorophenyl)-4-oxobut-2-enoate (7)

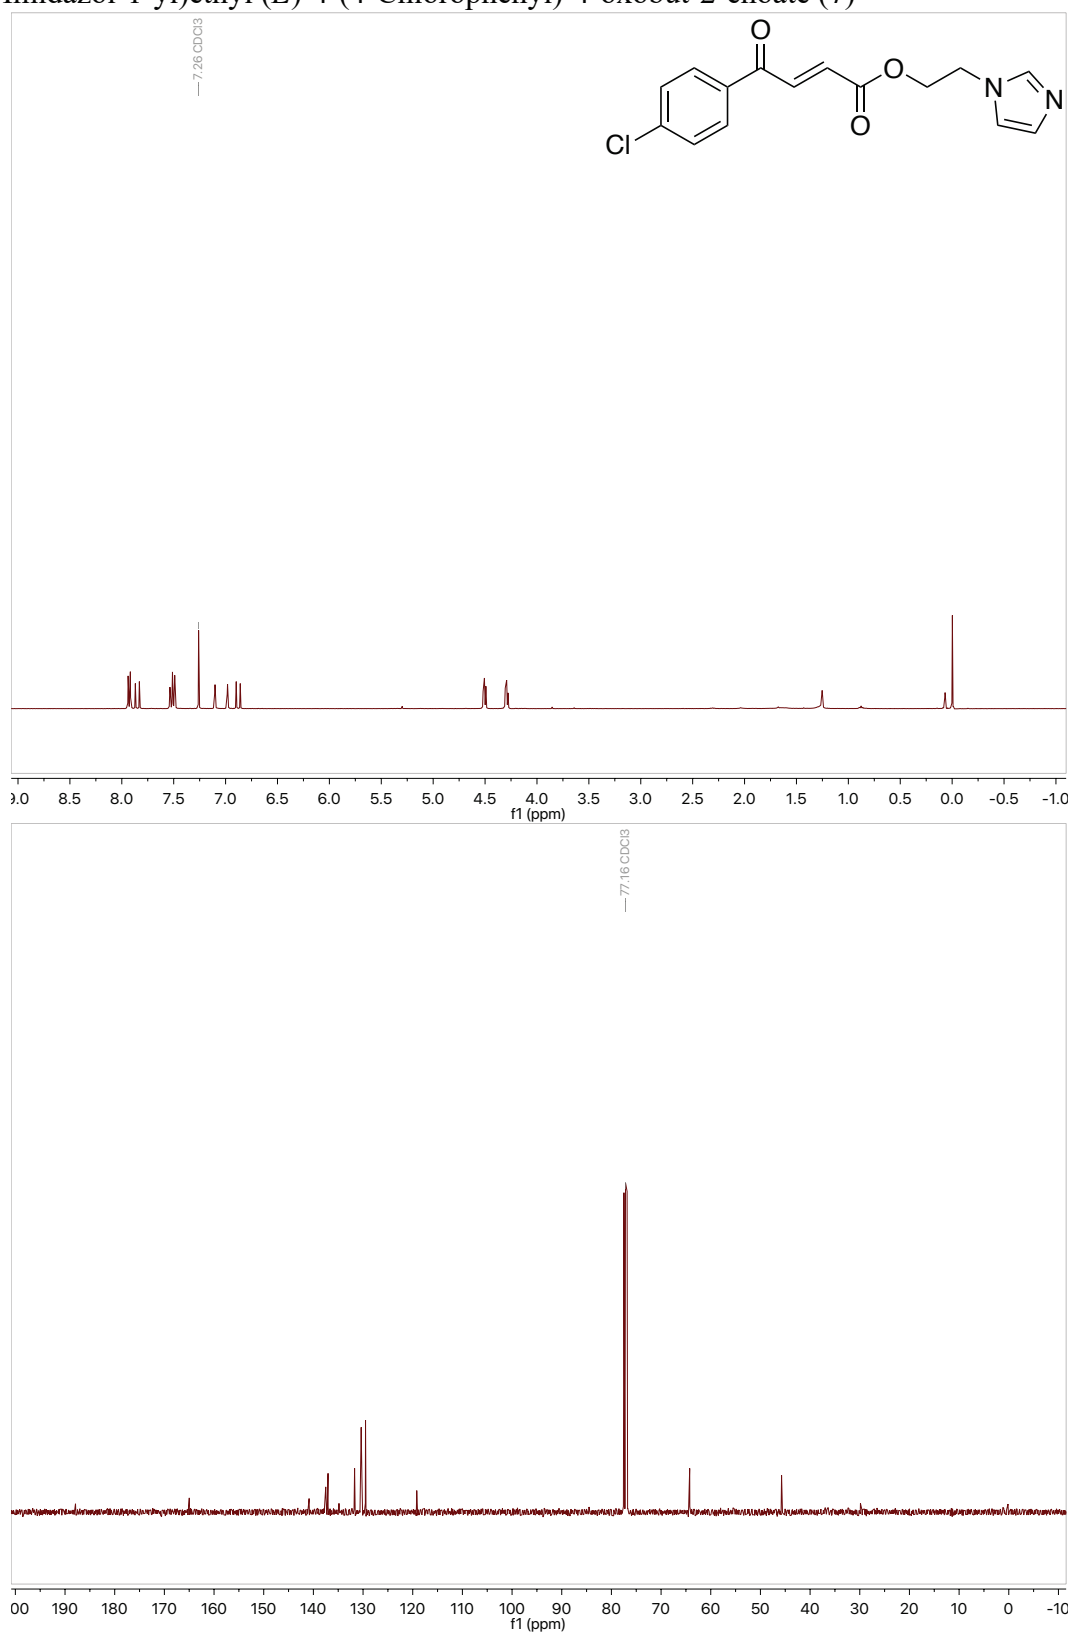

3-(1*H*-Imidazol-1-yl)propyl (*E*)-4-(4-Chlorophenyl)-4-oxobut-2-enoate (**8**)

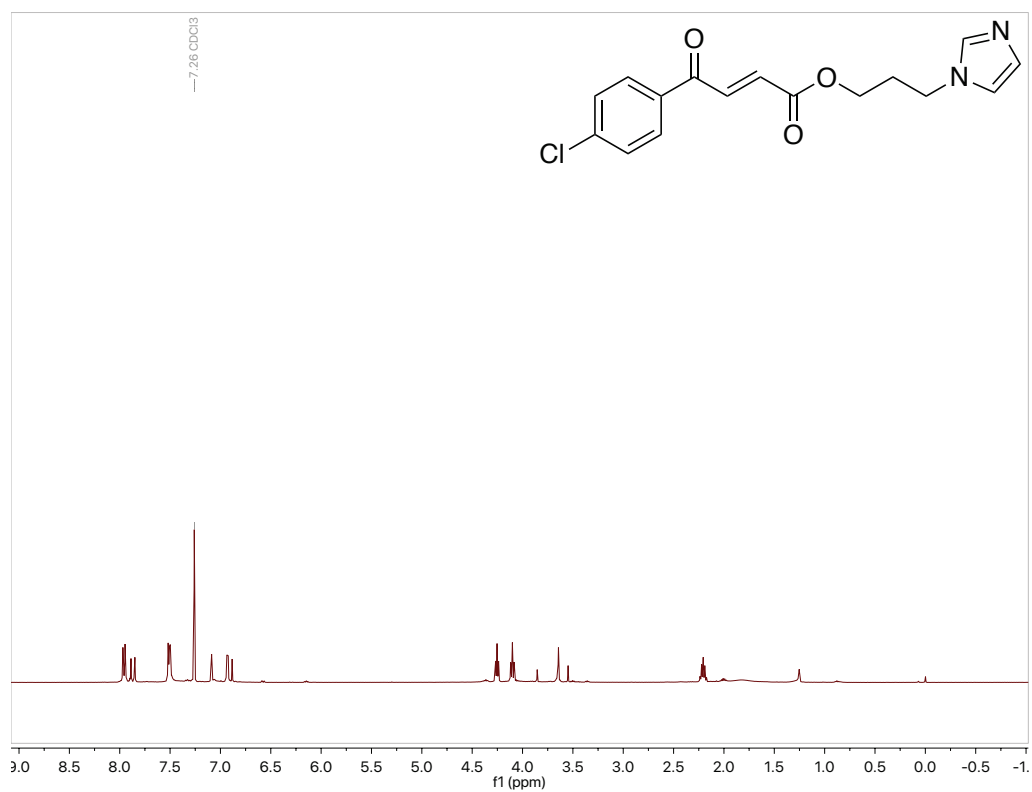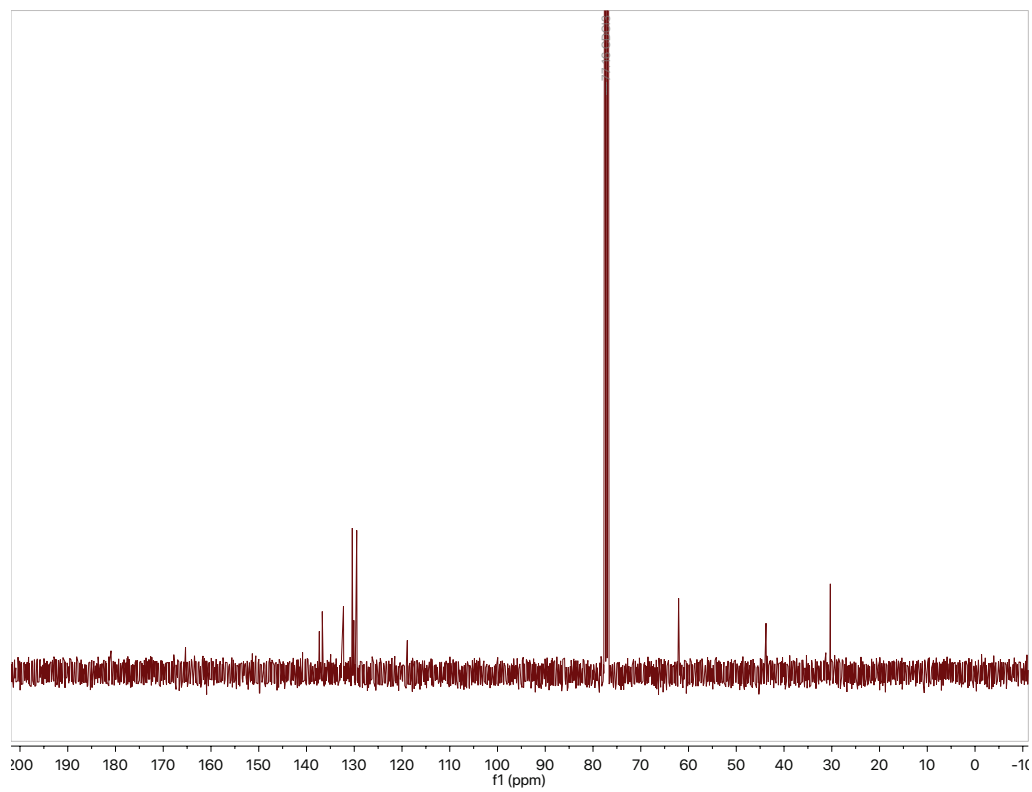

2-(2-Methyl-1*H*-imidazol-1-yl)ethyl (*E*)-4-(4-Chlorophenyl)-4-oxobut-2-enoate (**9**)

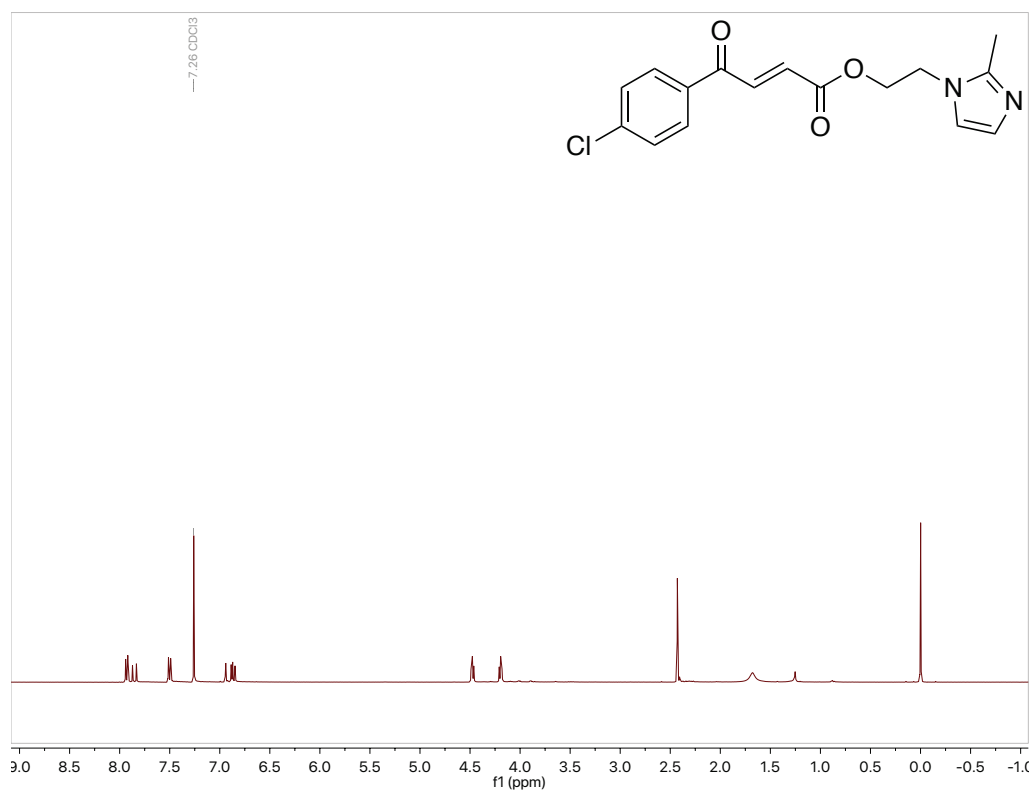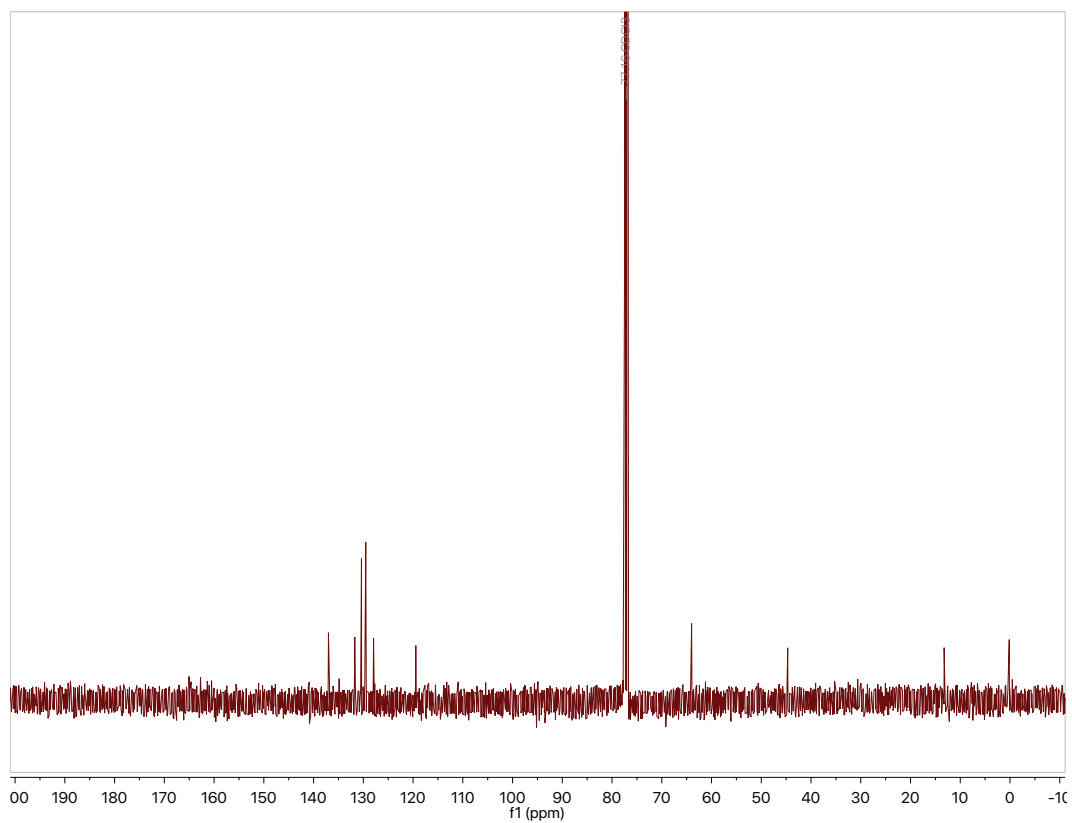





Phenyl 2-(Thiophen-2-yl)acetate (**S2**)

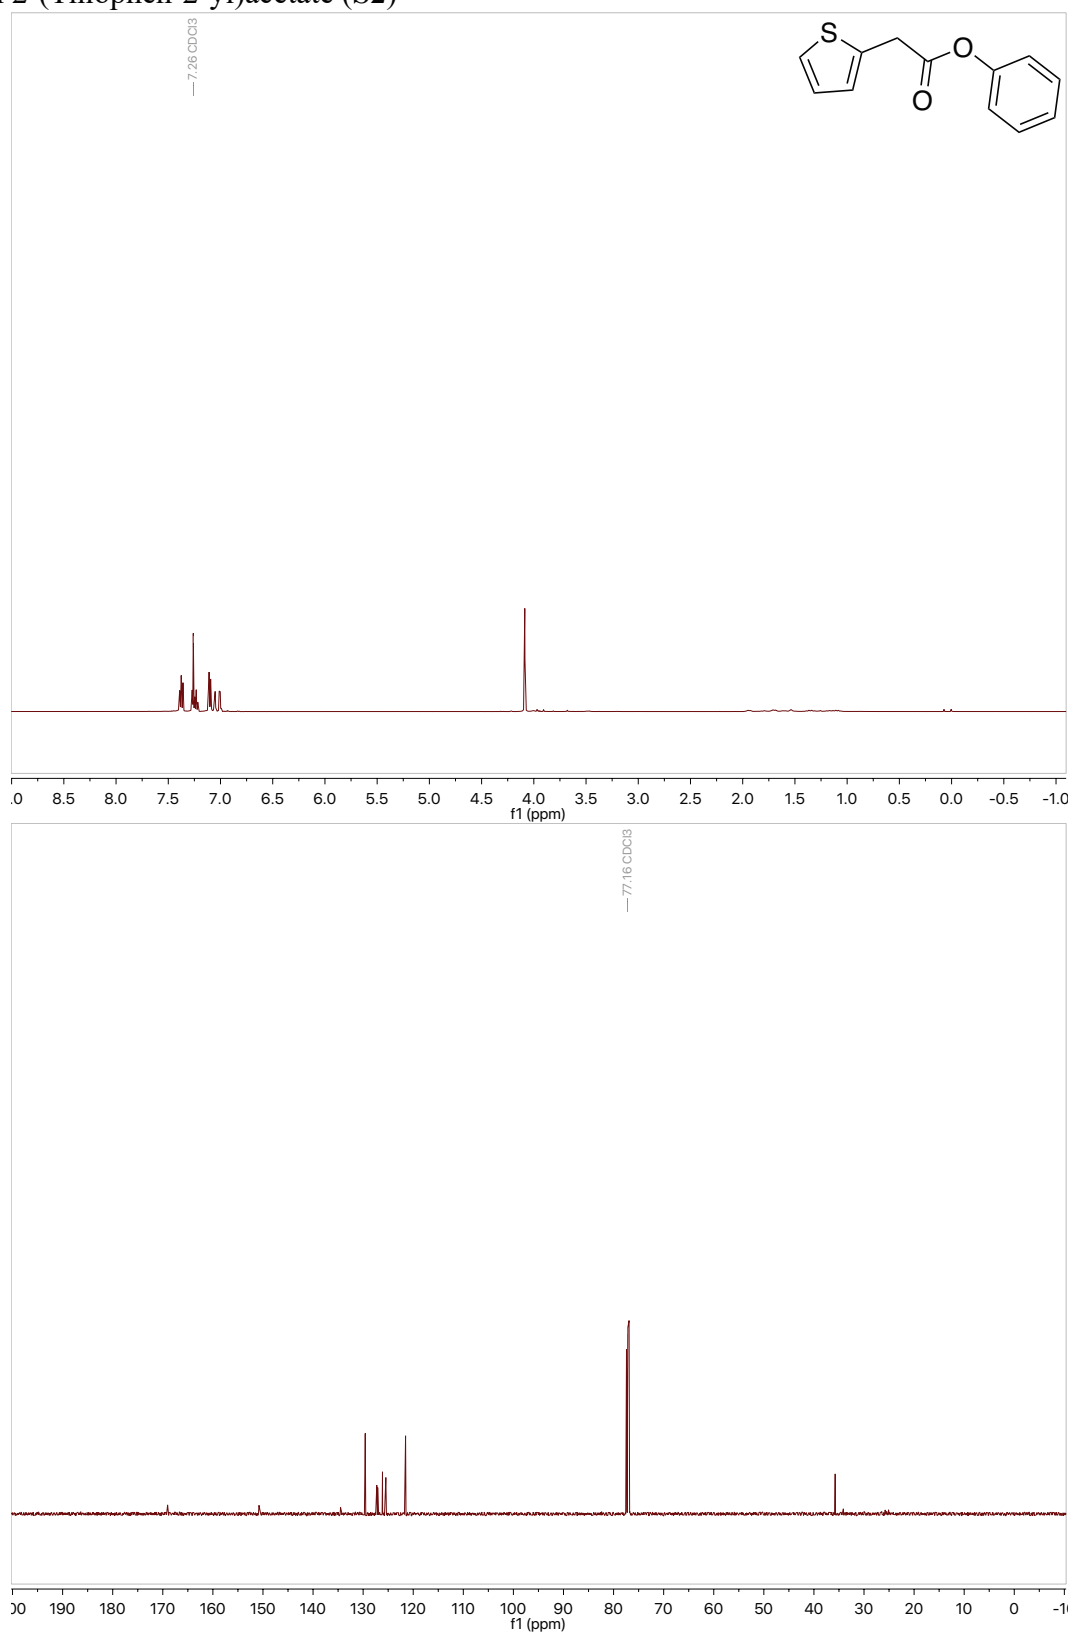

2-(1*H*-Pyrazol-1-yl)ethyl 2-(Thiophen-2-yl)acetate (**S3**)

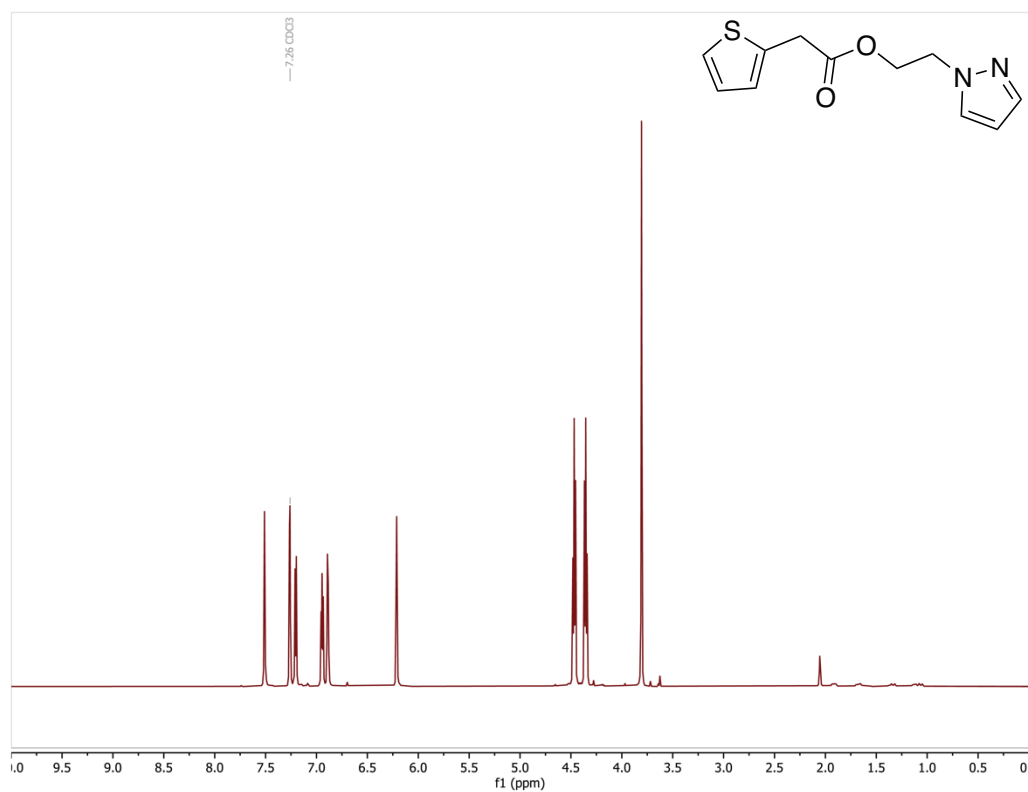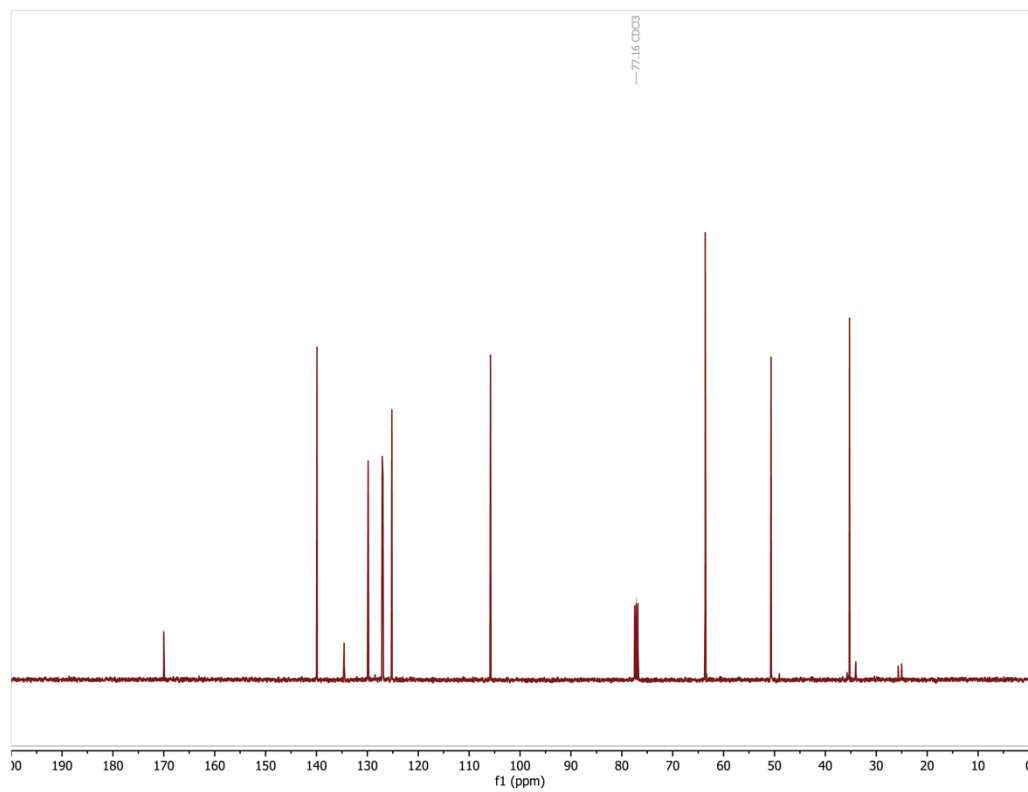

2-(1*H*-Imidazol-1-yl)ethyl 2-(Thiophen-2-yl)acetate (**S4**)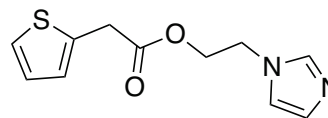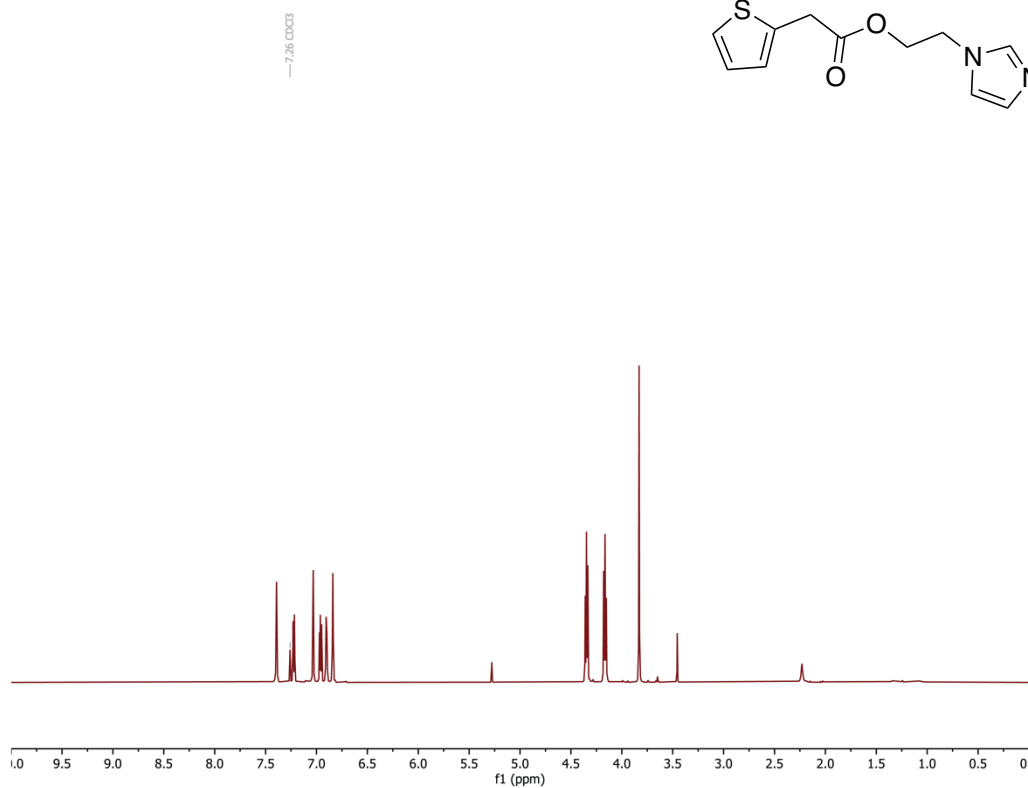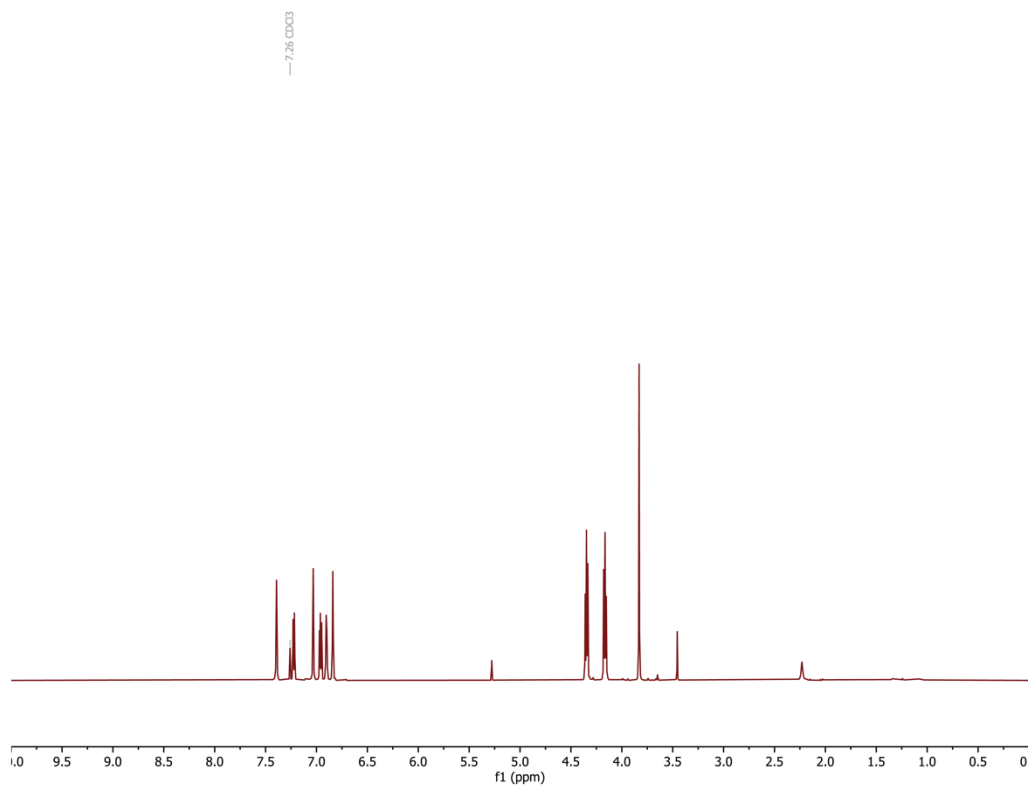

2-(2-Methyl-5-nitro-1*H*-imidazol-1-yl)ethyl 2-(Thiophen-2-yl)acetate (**S5**)

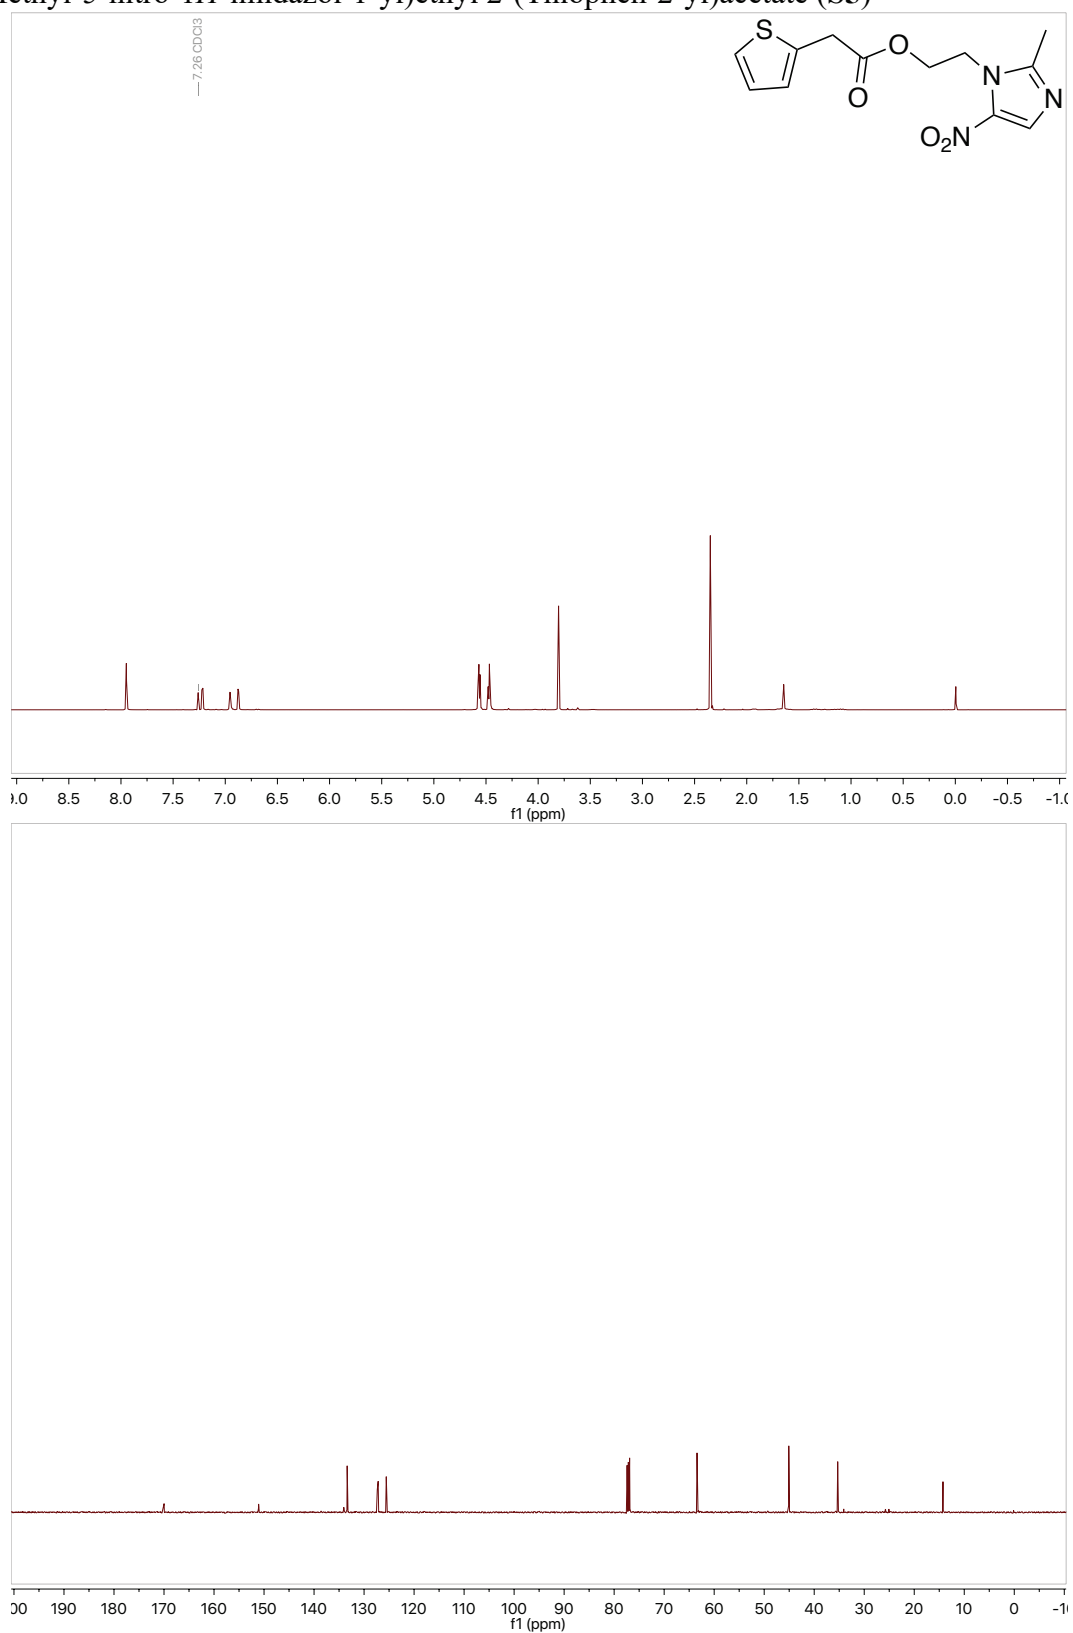

2-(2-Methyl-1*H*-imidazol-1-yl)ethyl 2-(Thiophen-2-yl)acetate (**S6**)

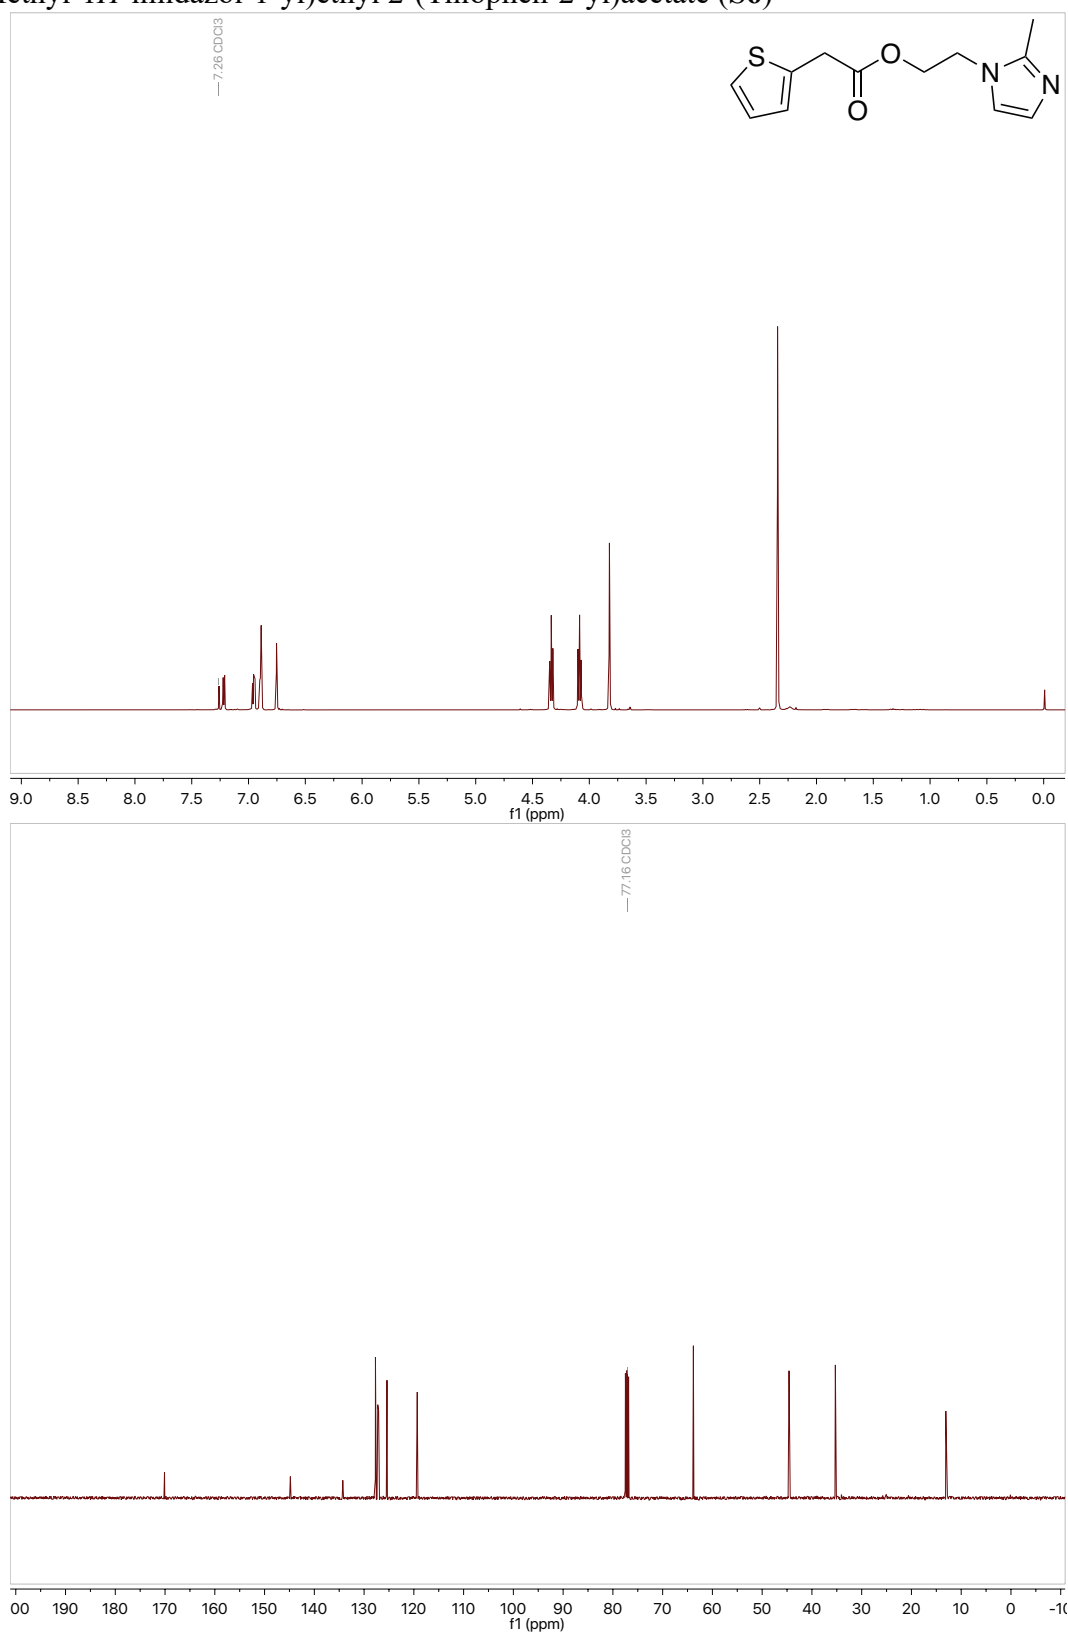

2-(2-Ethyl-1*H*-imidazol-1-yl)ethyl 2-(Thiophen-2-yl)acetate (**S7**)

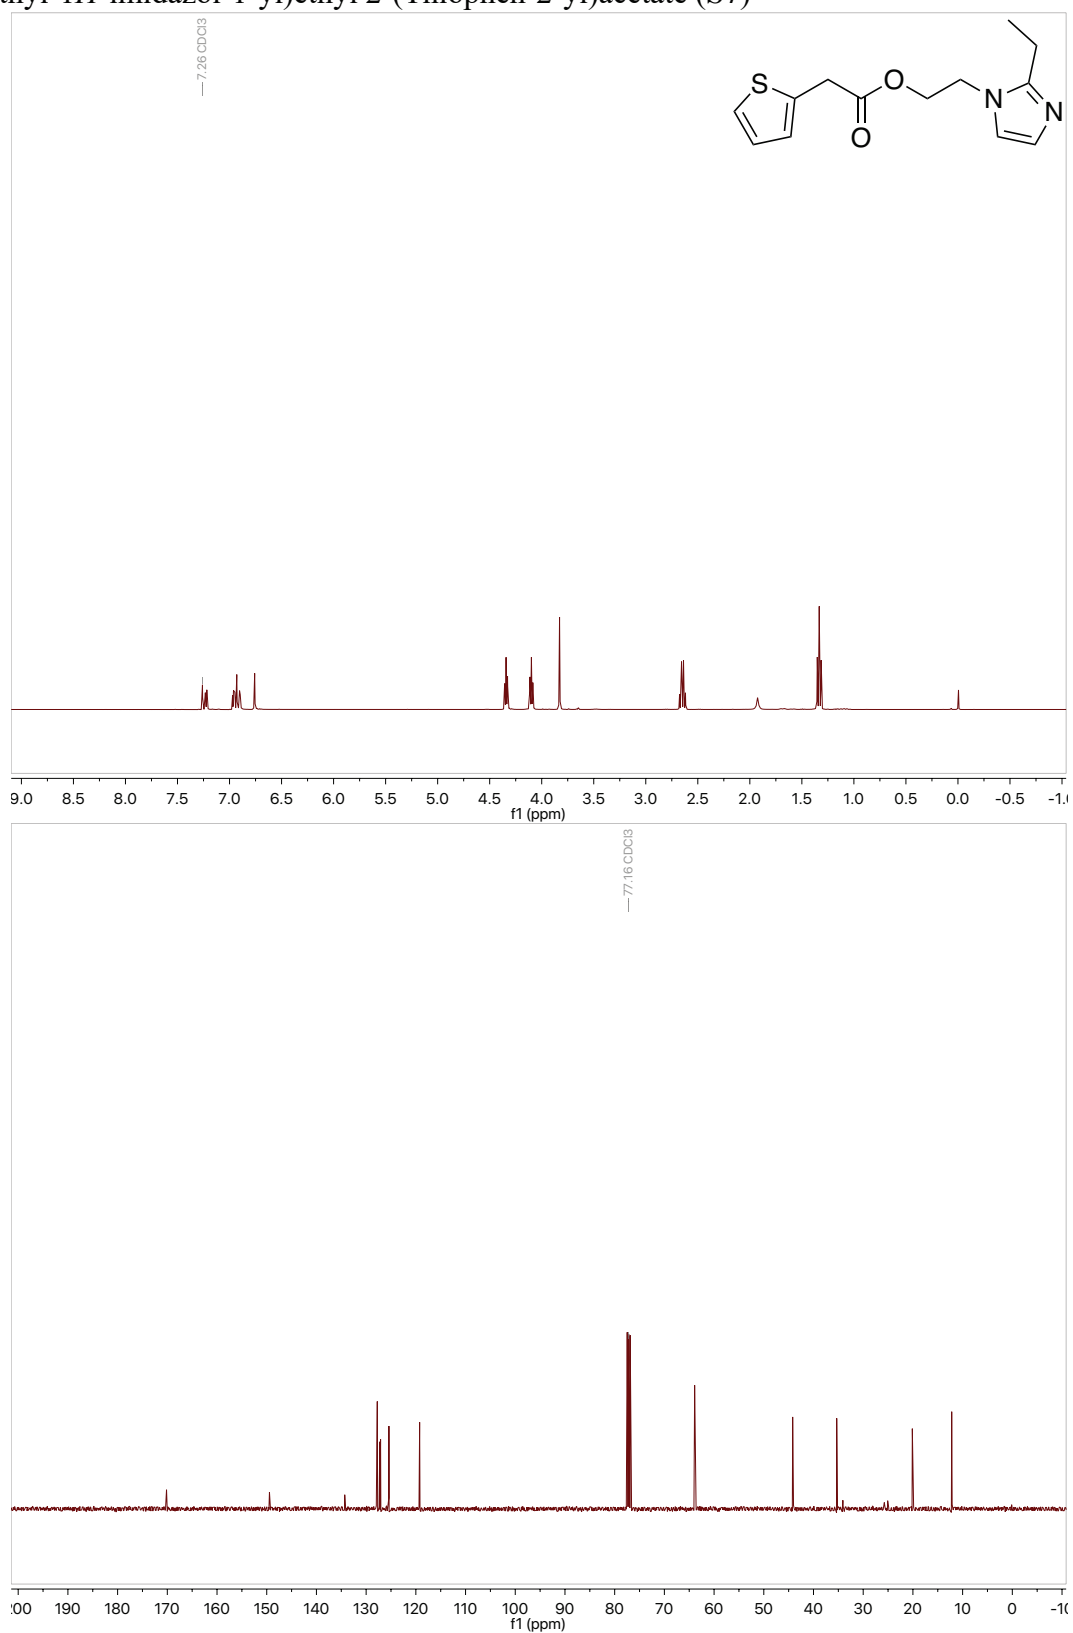

*tert*-Butyl 2-(Thiophen-2-yl)acetate (**S8**)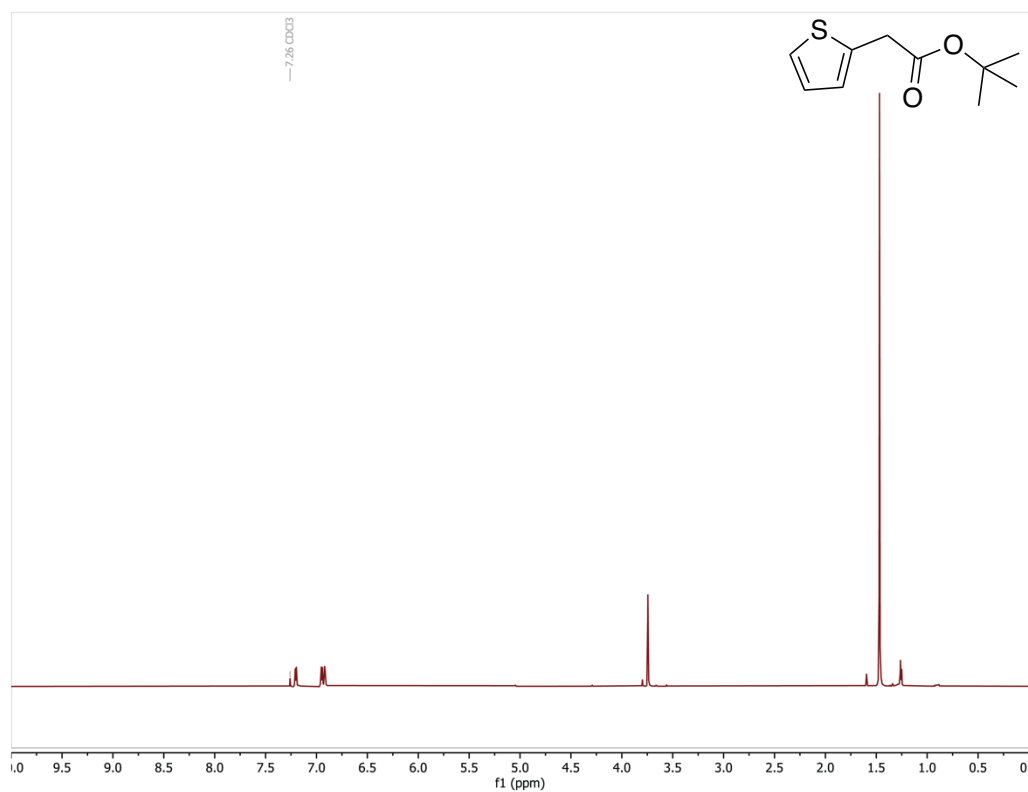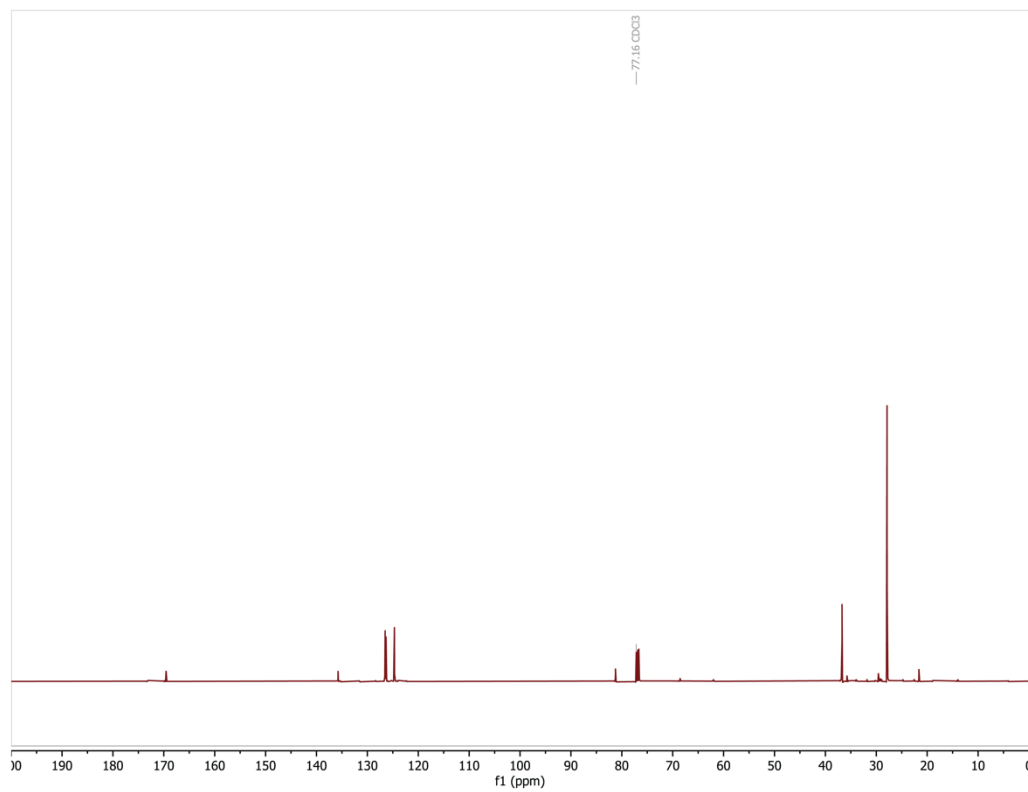

Methyl 2-(2-Methyl-1*H*-imidazol-1-yl)acetate (**S9**)

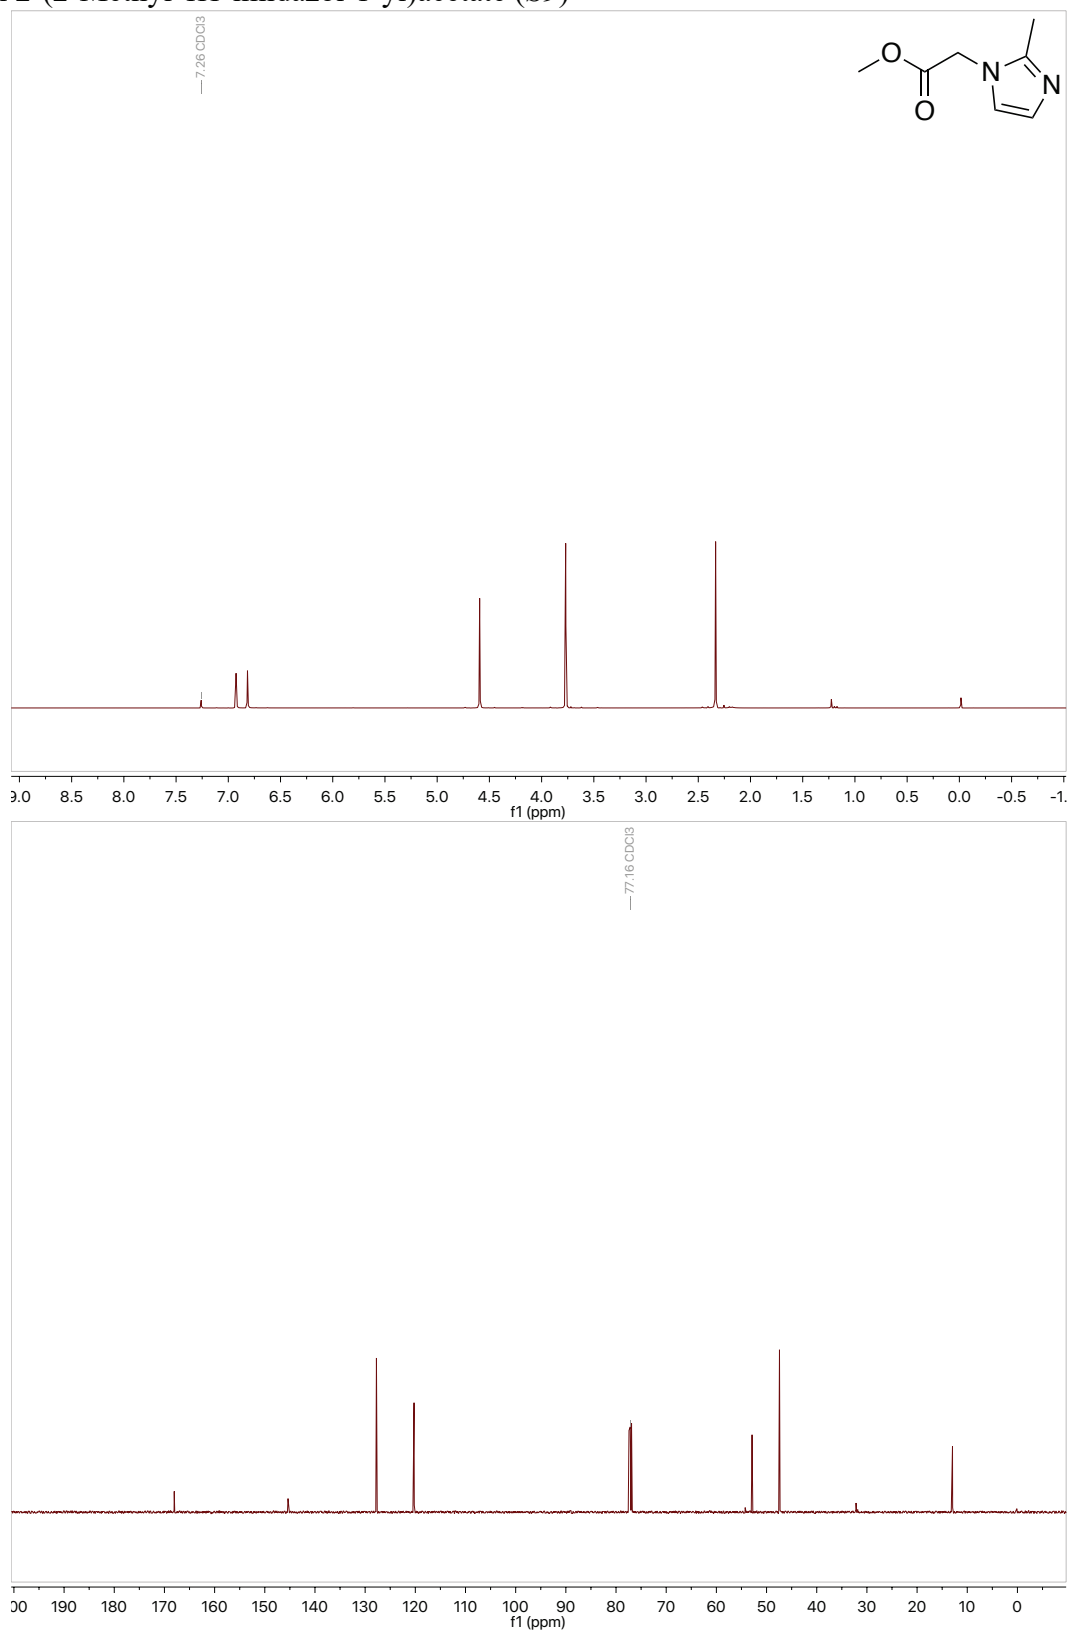



Methyl 2-(2-Ethyl-1*H*-imidazol-1-yl)acetate (**S10**)

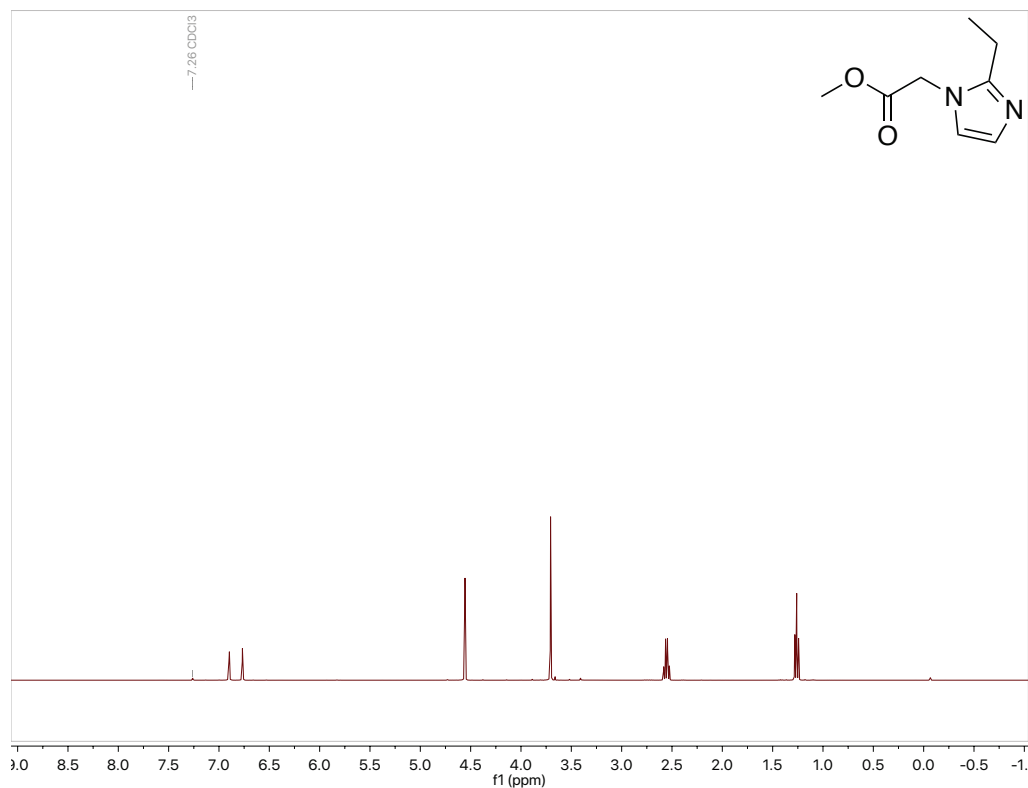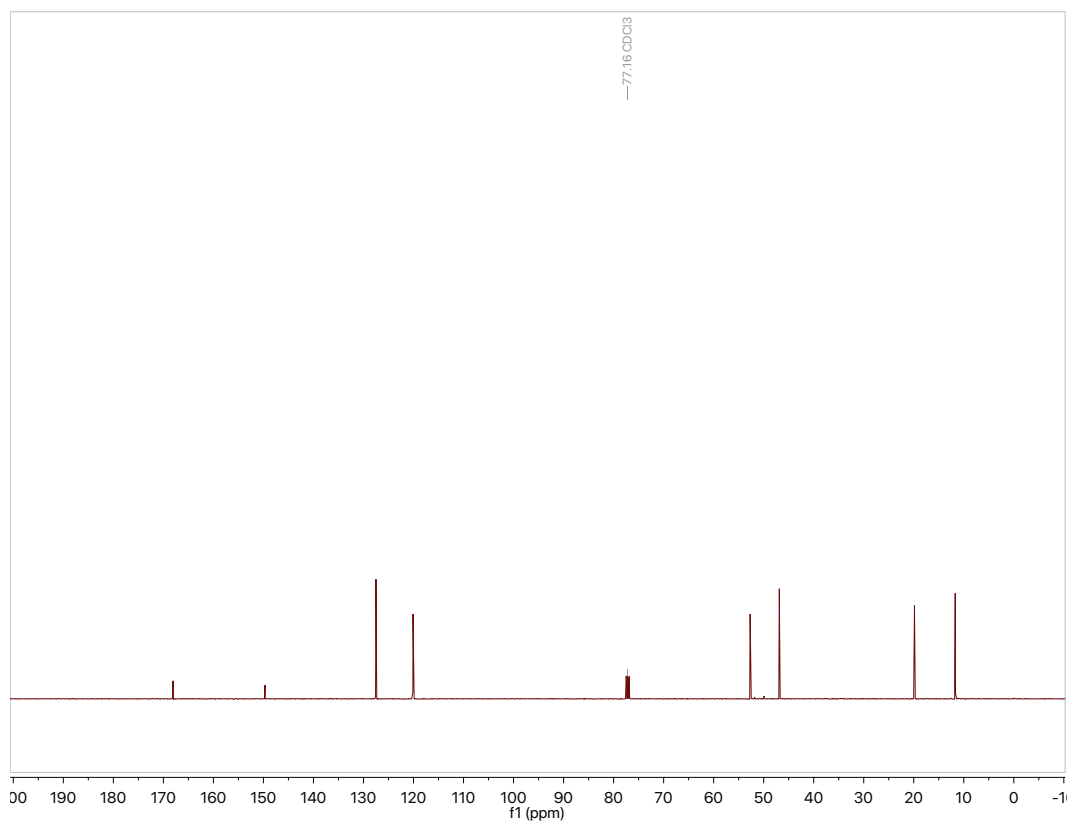

2-(2-Methyl-1*H*-imidazol-1-yl)ethan-1-ol (**S11**)

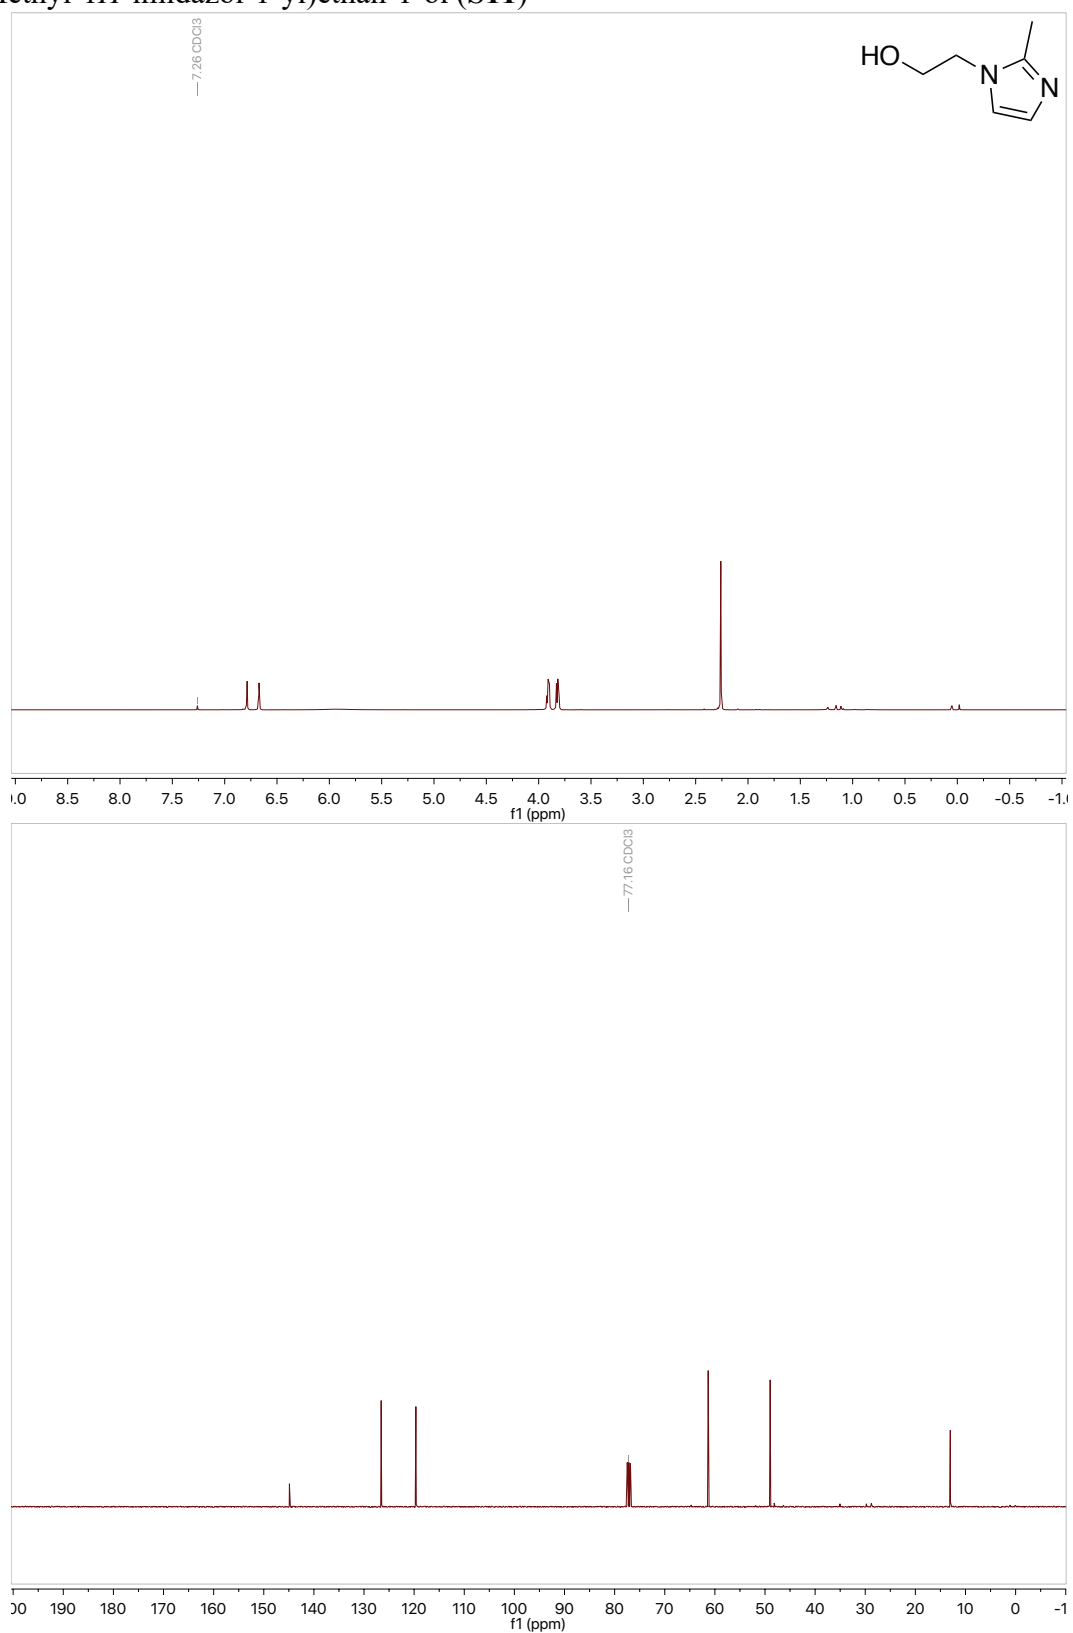

2-(2-Ethyl-1*H*-imidazol-1-yl)ethan-1-ol (**S12**)

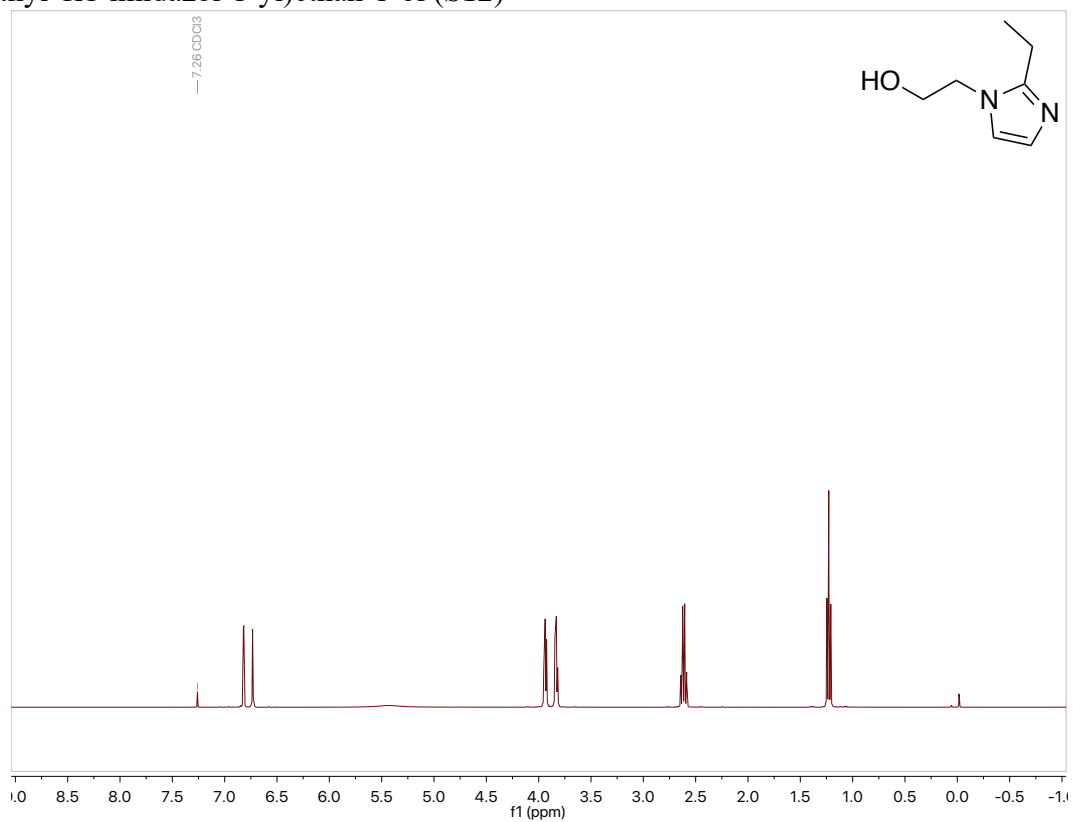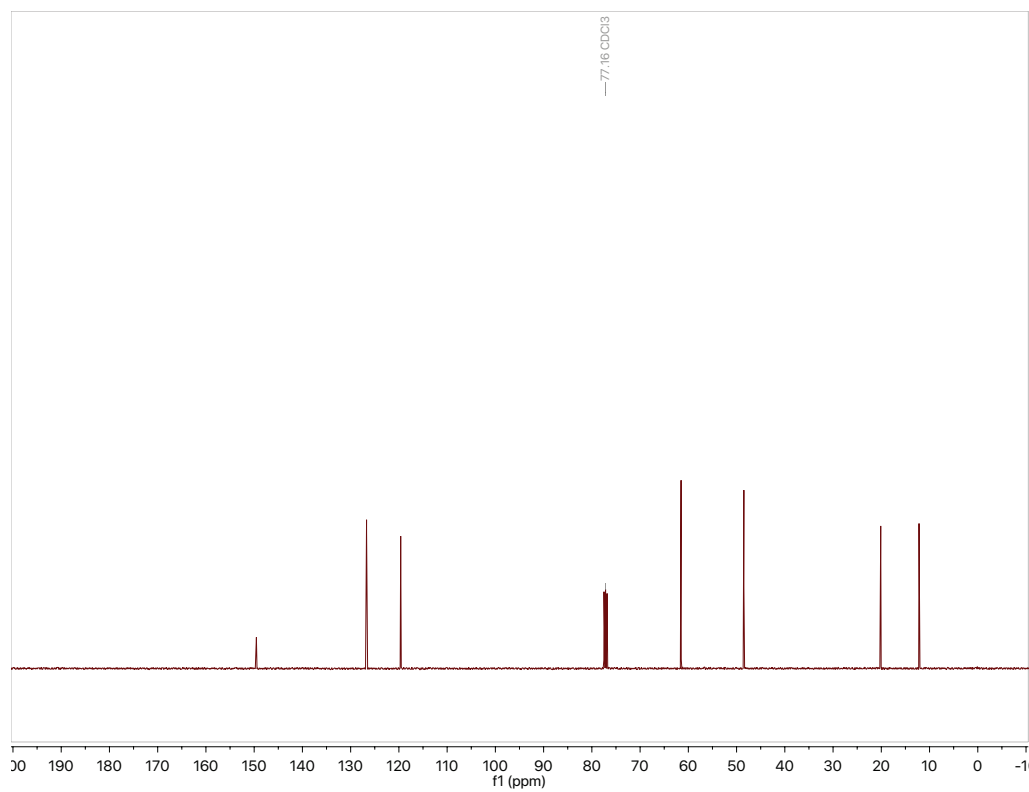

3-(1*H*-Imidazol-1-yl)propan-1-ol (S13)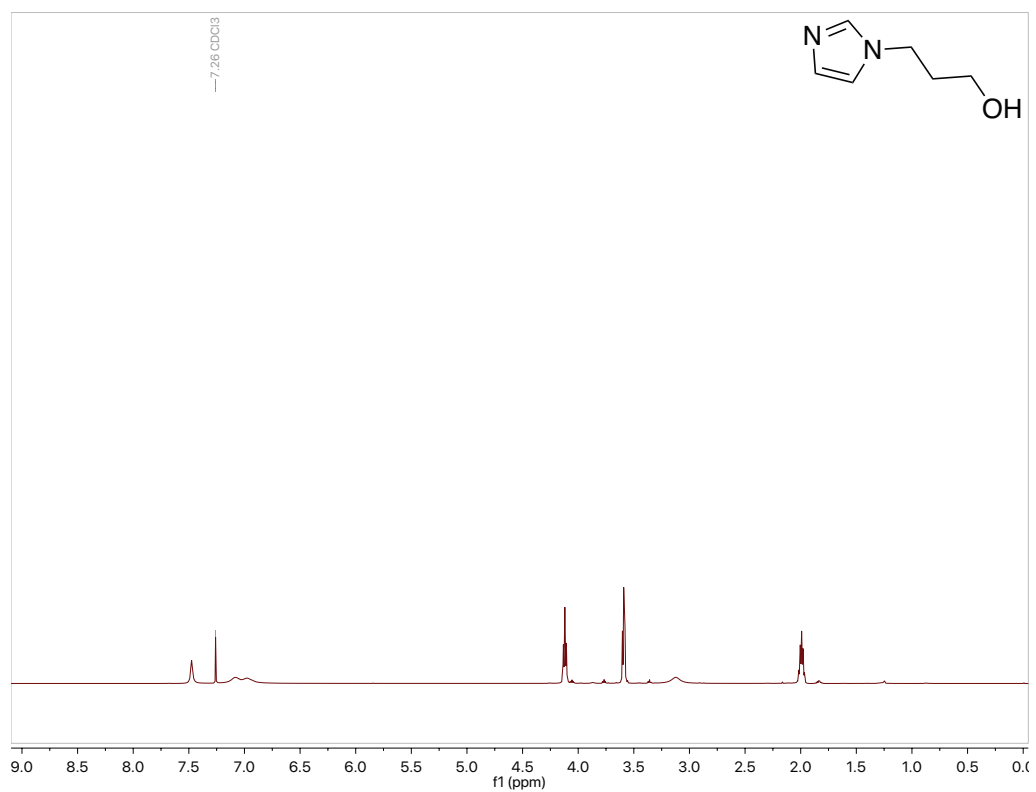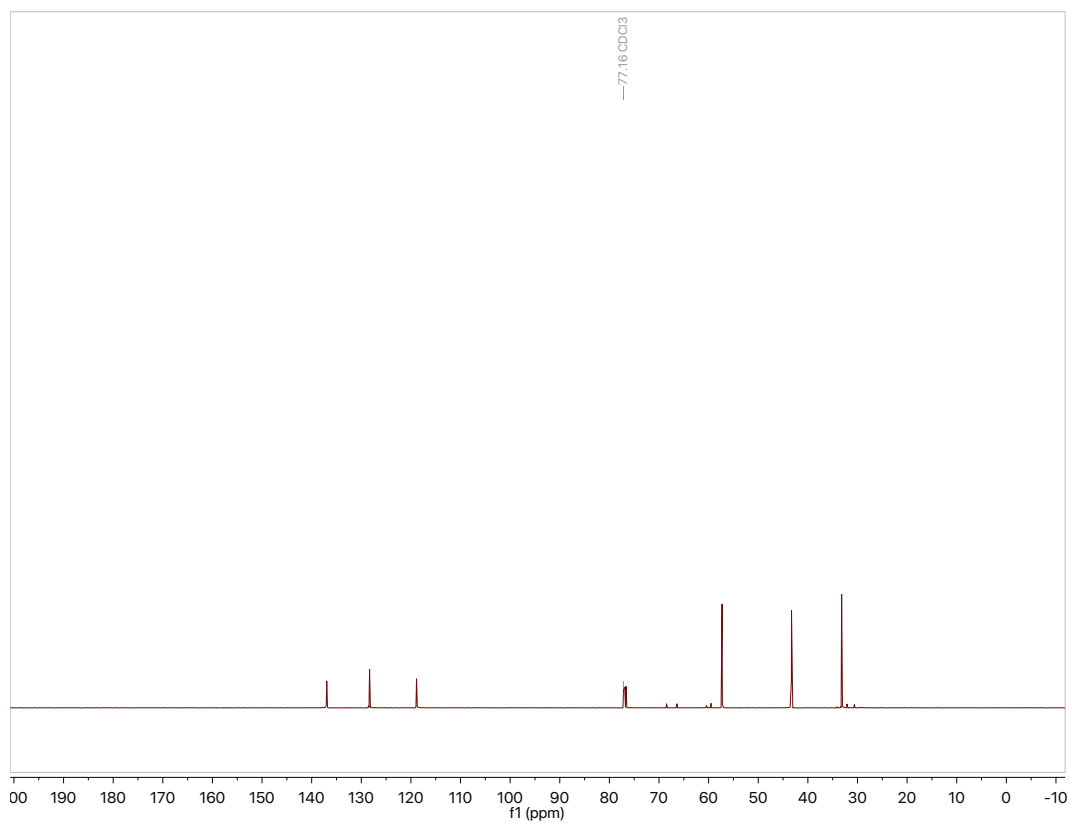

## References

- (1) Hetrick, K. J.; Aguilar Ramos, M. A.; Raines, R. T., Terbium(III) luminescence-based assay for esterase activity. *Anal. Chem.* **2019**, *91*, 8615–8621.
- (2) Gerlt, J. A.; Bouvier, J. T.; Davidson, D. B.; Imker, H. J.; Sadkhin, B.; Slater, D. R.; Whalen, K. L., Enzyme function initiative–enzyme similarity tool (EFI–EST): A web tool for generating protein sequence similarity networks. *Biochim. Biophys. Acta Proteins Proteom.* **2015**, *1854*, 1019–1037.
- (3) Shannon, P.; Markiel, A.; Ozier, O.; Baliga, N. S.; Wang, J. T.; Ramage, D.; Amin, N.; Schwikowski, B.; Ideker, T., Cytoscape: A software environment for integrated models of biomolecular interaction networks. *Genome Res.* **2003**, *13*, 2498–2504.
- (4) Schmidt, C. M.; Shis, D. L.; Nguyen-Huu, T. D.; Bennett, M. R., Stable maintenance of multiple plasmids in *E. coli* using a single selective marker. *ACS Synth. Biol.* **2012**, *1*, 445–450.
